# Artificial selection of microbial communities can become effective after using evolution-informed strategies

Li Xie\* , Alex Yuan, and Wenyng Shou\*

\*Basic Sciences Division, Fred Hutchinson Cancer Research Center, Seattle, WA, 98102

## Abstract

Multi-species microbial communities often display “community functions” stemming from interactions of member species. Interactions are often difficult to decipher, making it challenging to design communities with desired functions. Alternatively, similar to artificial selection for individuals in agriculture and industry, one could repeatedly choose communities with the highest functions to reproduce by randomly partitioning each into multiple “Newborn” communities for the next cycle. However, community selection is challenging since rapid changes in species and genotype compositions can limit the heritability of community function. To understand how to enact community selection, we used an individual-based model to simulate this process to improve a community function that requires two species and is costly to one species. Improvement was stalled by non-heritable variations in community function, such as the stochastic populating of Newborn communities or measurement errors of community function. Community function improved when these non-heritable variations were suppressed in experimentally feasible manners.

## Introduction

Multi-species microbial communities often display important *functions*, defined as biochemical activities not achievable by member species in isolation. For example, a six-species microbial community, but not any member species alone, cleared relapsing *Clostridium difficile* infections in mice [1]. Community functions arise from *interactions* where an individual alters the physiology of another individual. Thus, to improve community function, one could identify and modify interactions [2, 3]. In reality, this is no trivial task: each species can release tens or more compounds, many of which may influence the partner species in diverse fashions [4, 5, 6, 7]. From this myriad of interactions, one would then need to identify those critical for community function, and modify them by altering species genotypes or the abiotic environment. One could also artificially assemble different combinations of species or genotypes at various ratios to screen for high community function. However, the number of combinations becomes very large even for a moderate number of species and genotypes.

---

\* Author of correspondence

30 In an alternative approach, artificial selection of whole communities could be carried out over cycles  
31 to improve community function [8, 9, 10, 11, 12] (reviewed in [13, 14, 15]). A selection cycle starts with  
32 a collection of low-density communities with artificially-imposed boundaries (e.g. inside culture tubes).  
33 These low-density communities are incubated for a period of time during which community members  
34 multiply and interact with each other and possibly mutate, and the community function of interest (e.g.  
35 pollutant degradation) develops. At the end of incubation, desired communities (e.g. those degrading the  
36 most pollutant) are chosen to “reproduce” where each is randomly partitioned into multiple low-density  
37 communities to start the next cycle. Superficially, this process may seem straightforward since “one  
38 gets what one selects for”. After all, artificial selection on individuals has been successfully implemented  
39 to obtain, for example, proteins of enhanced activities (Figure S1). However, compared to artificial  
40 selection of individuals or mono-species groups, artificial selection of multi-species communities is more  
41 challenging due to the limited heritability of community function. This is because community function,  
42 determined by species and genotype compositions, can change rapidly from one selection cycle to the  
43 next due to ecology and evolution (see detailed explanation in Figure S1). For example, member species  
44 critical for community function may get lost during growth and selection cycles. Consequently, artificial  
45 selection on whole communities has rarely been attempted.

46 The few attempts of community selection have generated interesting results. One theoretical study  
47 simulated artificial selection on multi-species communities based on their ability to modify their abiotic  
48 environment [10]. Communities responded to selection, but the response quickly leveled off, and could  
49 be generated without mutations. Thus, in this case, selection acted on species types instead of new  
50 genotypes [10]. In experiments, complex microbial communities were selected to improve their abilities  
51 to degrade a pollutant or to alter plant physiology [8, 9, 12, 11]. For example, microbial communities  
52 selected to promote early or late flowering in plants were dominated by distinct species types [11].  
53 Interestingly in other cases, a community trait may fail to improve despite selection, and may improve  
54 even without selection [8, 9].

55 Intriguing as these selection attempts might be, much remains unknown. First, was the trait under  
56 selection a community function or an attribute of a single species? If the latter, then community selection  
57 may not even be needed. Second, did selection act solely on species types or also on newly-arising  
58 genotypes? If the former ([10, 11]), then without immigration of new species, community function may  
59 quickly level off [10]. If the latter, then community function could continue to improve as new genotypes  
60 evolve. Finally, why might a community trait sometimes fail to improve despite selection [8, 9]?

61 We are particularly interested in using artificial community selection to improve “costly” community  
62 functions. A community function is costly if any community member’s fitness is reduced by contributing to  
63 that community function. Costly community functions are common in engineered microbial communities  
64 [16]. To improve a costly community function, artificial community selection must overcome natural  
65 selection which favors low community function.

66 To understand how to effectively enact community selection to improve a costly community function,  
67 here we simulate artificial selection of communities consisting of two defined species. Since a two-  
68 species community is simpler than most natural communities, we can mechanistically investigate how  
69 community members evolve under community selection. We also designed our simulations to mimic real  
70 lab experiments so that our conclusions can guide future experiments. For example, model parameters,  
71 including species phenotypes, mutation rate, and distribution of mutation effects, are based on a wide  
72 variety of published experiments. Thus, our model differs from previous models which focused on  
73 binary phenotypes (e.g. contributing or not contributing to community function) [17]. In addition,  
74 our model incorporates chemical mechanisms of species interactions, as advocated by [18, 19]. Our  
75 simulations show that artificial community selection can work with as few as 100 communities. However,  
76 this requires suppression of non-heritable variations in community function, including those caused by

77 routine experimental procedures such as pipetting and those caused by measurement errors of community  
78 function.

## 79 Results

80 We will first introduce the target of our community selection simulation: a two-species community that  
81 converts substrates to a valued product. We will then demonstrate conditions for species coexistence,  
82 define community function, and describe how we simulate community dynamics and artificial community  
83 selection. Finally, from simulation results, we will discuss how to make artificial community selection  
84 effective. To avoid confusion, we will use “community selection” or “selection” to describe the entire  
85 process of artificial community selection (community formation, growth, selection, and reproduction),  
86 and use “choose” to refer to the selection step.

### 87 **A Helper-Manufacturer community that converts substrates into** 88 **a product**

89 Motivated by previous successes in engineering two-species microbial communities that convert substrates  
90 into useful products [20, 21, 22], we numerically simulated selection of such communities. In our  
91 community (Figure 1), Manufacturer M can manufacture Product P of value to us (e.g. a bio-fuel  
92 or a drug), but only if helped by Helper H. Specifically, Helper but not Manufacturer can digest an  
93 agricultural waste (e.g. cellulose), and as Helper grows, it releases Byproduct B at no fitness cost to  
94 itself. Manufacturer requires H's Byproduct (e.g. carbon source) to grow. In addition, Manufacturer  
95 invests  $f_P$  ( $0 \leq f_P \leq 1$ ) fraction of its potential growth to make Product P while using the rest ( $1-f_P$ )  
96 for its biomass growth. Both species also require a shared Resource R (e.g. nitrogen). Thus, the two  
97 species together, but not any species alone, could convert substrates (Waste and Resource) into Product.

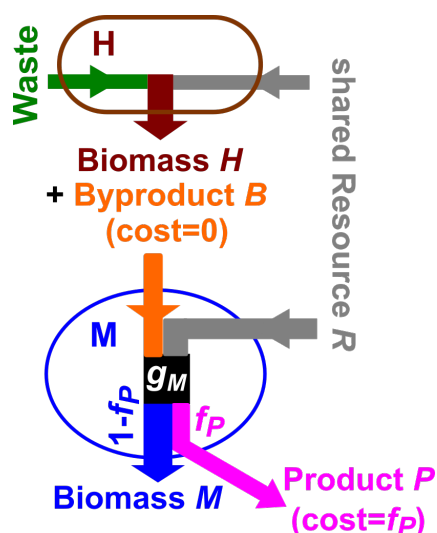

Figure 1: **A Helper-Manufacturer community that converts substrates into a product.** Helper H consumes Waste (present in excess) and Resource to grow biomass, and concomitantly releases Byproduct B at no fitness cost to itself. H's Byproduct B is required by Manufacturer M. M consumes Resource and H's Byproduct, and invests a fraction  $f_P$  of its potential growth  $g_M$  to make Product P while channeling the remaining to biomass growth. When biomass growth ceases, Byproduct and Product will no longer be made. The five state variables (italicized)  $H$ ,  $M$ ,  $R$ ,  $B$ , and  $P$  correspond to the amount of H biomass, M biomass, Resource, Byproduct, and Product in a community, respectively.

98

## 99 **Helpers and Manufacturers can coexist only under certain con-** 100 **ditions**

101 During each community selection cycle, we assemble low-density "Newborn" H-M communities and  
102 supply each with a fixed amount of Resource. We will then allow these Newborn communities to  
103 grow ("mature") over a fixed time  $T$  into high-density "Adult" communities during which community  
104 function develops. To achieve high community function, we want H and M species to coexist throughout  
105 community maturation. Furthermore, species ratio should not be extreme, because otherwise the low-  
106 abundance species could be lost by chance during community formation.

107 To achieve these goals, we note that upon Newborn formation, H can immediately start to grow on  
108 Waste and Resource. In contrast, M cannot grow until H's Byproduct has accumulated. Thus, if M  
109 always grows slower than H, the community would devolve to a single species H. Consequently, sustained  
110 coexistence requires that M's growth rate exceeds H's growth rate at some point during community  
111 maturation. We thus assigned the maximal birth rate achievable by M in excess nutrients to exceed that  
112 achievable by H (Table 1, Methods Section 2). A related requirement for coexistence is that the fraction  
113 growth M diverts for making Product ( $f_P$ ) must not be too large, or else M would always grow slower  
114 than H and thus go extinct (Figure 2 top).

115 In the H-M community, the steady state species ratio is a function of  $f_P$  as well as  $c_{BM}$  - the  
116 amount of Byproduct consumed per M biomass grown divided by the amount of Byproduct released  
117 per H biomass grown (Eq. 14 in Methods; Table 1). To achieve moderate specie ratio,  $1 - f_P$  and  
118  $c_{BM}$  need to be of comparable magnitude. We chose parameters so that different initial species ratios  
119 would converge to a moderate steady state value (Figure 2, bottom). All our parameters were based on

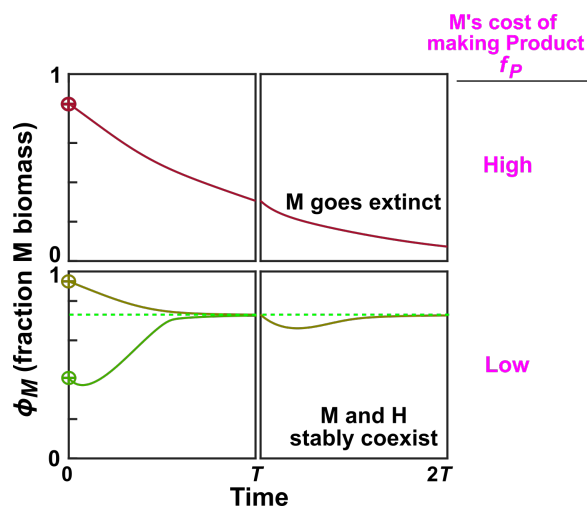

Figure 2: **H and M can stably coexist at low  $f_P$ .** Here, we plotted the fraction of M biomass of a community over two maturation cycles. **Top:** When  $f_P$ , the fraction of potential growth Manufacturer diverts for making Product, is high (e.g.  $f_P = 0.8$ ), M goes extinct. **Bottom:** At low  $f_P$  (e.g.  $f_P = 0.1$ ), H and M can stably coexist. That is, species ratio will converge to a steady state value. Calculations were based on equations 6-10 with parameters in the last column of Table 1. At the end of the first cycle (time  $T$ ), Byproduct and Resource were re-set to the initial conditions at time zero, and total biomass was reduced to  $BM_{target}$  while  $\phi_M$  remained the same as that of the parent community.

120 published yeast and *E. coli* measurements (Table 1, Methods Section 2). Note that species coexistence  
 121 at a moderate ratio has been experimentally realized in engineered communities [20, 21, 23, 24].

## 122 Simulating community dynamics and selection

123 We define community function as the total amount of Product accumulated as a low-density Newborn  
 124 community grows into an Adult community over maturation time  $T$ , i.e.  $P(T)$  (Figure 3, top two rows).  
 125 In Methods Section 7, we explain problems associated with alternative definitions of community function  
 126 (e.g. per capita production). Community function is not costly to Helpers, but reduces M's growth rate  
 127 by fraction  $f_P$  (Figure 1).

128 We simulate four stages of community selection (Figure 3): formation of Newborn communities;  
 129 Newborn communities maturing into Adult communities; choosing highest-functioning Adult communi-  
 130 ties, and reproducing the chosen Adult communities by splitting each into multiple Newborn communi-  
 131 ties of the next cycle. Our simulation is individual-based, tracking phenotypes and biomass of individual H  
 132 and M cells in each community as cells grew, divided, mutated, or died. Our simulations also tracked  
 133 dynamics of chemicals (including Product) in each community, and described the actual experimental  
 134 steps such as pipetting cultures during community reproduction. Below, we describe model structure,  
 135 and parameters that we can vary for different community selection regimens.

## 136 Model structure

137 Our simulation started with  $n_{tot}$  number of Newborn communities (Methods Section 6). Each Newborn  
 138 community always started with a fixed amount of Resource and a total biomass close to a target value  
 139  $BM_{target}$  (see Methods Section 7 for problems associated with not having a biomass target). Waste was

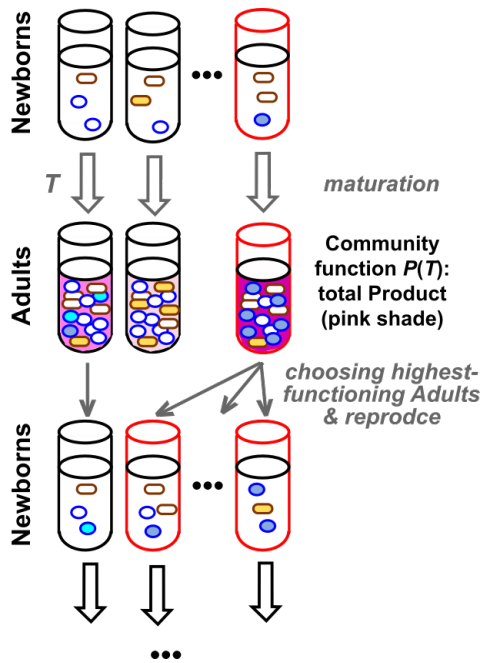

Figure 3: **Community selection scheme.** In our simulations, cycles of selection were performed on a total of  $n_{tot} = 100$  communities. At the beginning of the first cycle, each Newborn had a total biomass of  $BM_{target}=100$  (60 M and 40 H each of biomass 1). In subsequent cycles, species ratio would converge to the steady state value (Figure 2 bottom). Waste (not drawn) was in excess. The amount of Resource in each Newborn (not drawn) was fixed at a value that could support a total biomass of  $10^4$ . The maturation time  $T$  was chosen so that for an average community, Resource was not depleted (in experimental terms, this would avoid complications of the stationary phase). During maturation, Resource  $R$ , Byproduct  $B$ , Product  $P$ , and each cell's biomass were calculated from differential equations (Methods, Section 6). Death occurred stochastically to individual cells. A cell divided into two identical daughter cells once its biomass had reached a threshold of 2. After division, mutations (different shades of oval and rod) occurred stochastically to change a cell's phenotypes (maximal growth rate, affinity for metabolites, and M's  $f_P$ ). At the end of a cycle (time  $T$ ), the top-functioning Adult with the highest Product  $P(T)$  was chosen and diluted into as many Newborns as possible so that on average, each Newborn had a total biomass of approximately  $BM_{target}$ . We then proceeded to the next top-functioning Adult until  $n_{tot} = 100$  Newborns were generated for the next selection cycle. Communities with red outlines exemplify one lineage.

140 always supplied in excess and thus did not enter our equations. Note that except for the first cycle, the  
141 relative abundance of species in a Newborn community inherited that of the parent Adult community  
142 and remained at around the steady state value (Figure 2 bottom).

143 During community maturation, biomass of individual cells grew. The biomass growth rate of an H cell  
144 depended on Resource concentration (Monod Equation; Figure S4A; Eq. 23). As H grew, it consumed  
145 Resource and released Byproduct (Eqs. 21 and 22). The potential growth rate of an M cell depended  
146 on the concentrations of Resource and H's Byproduct ([25]; Figure S4B; see experimental support in  
147 Figure S5). M cell's actual biomass growth rate was  $(1 - f_P)$  fraction of M's potential growth rate (Eq.  
148 24). As M grew, it consumed Resource and Byproduct (Eqs. 21 and 22), and released Product at a  
149 rate proportional to  $f_P$  and M's potential growth rate (Eqs. 8). Meanwhile, cells died stochastically at  
150 a constant death rate. Once a cell's biomass grew from 1 to 2, it divided into two cells of equal biomass  
151 with identical phenotypes, thus capturing continuous biomass increase (Figure S3) as well as discrete  
152 cell division events observed experimentally [26]. Although mutations can occur during any stage of the  
153 cell cycle, we assigned mutations immediately after cell division, and each phenotype of each new cell  
154 mutated independently.

155 Mutable phenotypes included H and M's maximal growth rates and affinities for nutrients, and M's  $f_P$   
156 (fraction potential growth diverted for making Product), since these phenotypes have been observed to  
157 rapidly change during evolution ([27, 28, 29, 30]). Mutated phenotypes could range between 0 and their  
158 respective upper bounds. On average, half of the mutations abolished the function (e.g. zero growth  
159 rate, zero affinity, or  $f_P = 0$ ) based on experiments on GFP, viruses, and yeast [31, 32, 33]. Effects of  
160 the other 50% mutations were bilateral-exponentially distributed, enhancing or diminishing a phenotype  
161 by a few percent, based on our re-analysis of published yeast data sets [34] (Figure S8). We held release  
162 and consumption coefficients constant. This is because, for example, the amount of Byproduct released  
163 per H biomass generated is constrained by biochemical stoichiometry.

164 At the end of community maturation (time  $T$ ), we obtained the community function  $P(T)$  - the  
165 total amount of Product in the Adult community. After comparing community function of all Adults,  
166 we chose the highest-functioning Adult and split it randomly into Newborns of the target total biomass  
167  $BM_{target}$ . For example, if the chosen Adult had a total biomass of  $60BM_{target}$ , then each cell would be  
168 assigned a random integer from 1 to 60, and those cells with the same random integer would be allocated  
169 to the same Newborn. Experimentally, this is equivalent to dilution by volume using a pipette. Thus, for  
170 each Newborn, the total biomass and species ratio fluctuated around their expected values in a fashion  
171 associated with pipetting. When the highest-functioning Adult was used up, the next highest-functioning  
172 Adult was chosen and reproduced until  $n_{tot}$  Newborns were generated for the next selection cycle.

173 Our model captures the alternating force of natural and artificial selection: Natural selection favors  
174 faster growers during community maturation, and artificial selection for high community function allows  
175 the highest-functioning communities to reproduce at the end of each selection cycle.

## 176 Parameters of selection regimen

177 Parameters of selection regimen include the total number of communities under selection ( $n_{tot}$ ), Newborn  
178 target total biomass ( $BM_{target}$ ), the amount of Resource added to each Newborn ( $R(0)$ ), the amount  
179 of mutagenesis which controls the rate of phenotype-altering mutations ( $\mu$ ), and maturation time ( $T$ ).  
180 To ensure successful community selection, these parameters must be carefully chosen.

181 If the total number of communities  $n_{tot}$  is very large, then the chosen community will likely display  
182 a higher community function than if  $n_{tot}$  is small, but the experimental setup is more challenging. We  
183 chose a total of 100 communities ( $n_{tot}=100$ ).

184 If the mutation rate is very low, then community function cannot rapidly improve. If the mutation

185 rate is very high, then non-producers will be generated at a high rate and community function will be  
186 reduced. Here, we chose  $\mu$ , the rate of phenotype-altering mutations, to be biologically realistic (0.002  
187 per cell per generation per phenotype, which is lower than the highest values observed experimentally;  
188 Methods Section 4).

189 If Newborn total biomass  $BM_{target}$  is very large, or if the number of generations within  $T$  is very  
190 large, then non-producers will take over in all communities during maturation. This reduces the variance  
191 among Adults and limits the potential for selection (Figure S2, compare **A-C** with **D**). On the other  
192 hand, if both  $BM_{target}$  and the number of generations within  $T$  are very small, mutations will be rare  
193 within each cycle, and many cycles will be required to improve community function. Finally, if  $BM_{target}$   
194 is very small, then a member species might get lost by chance during Newborn formation. In our  
195 simulations, we chose Newborn's target total biomass  $BM_{target}=100$  biomass (e.g. 60 M cells and 40  
196 H cells at 1 biomass/cell in the first cycle; cell biomass varying between 1 and 2 in later cycles). Unless  
197 otherwise stated, we fixed the input Resource  $R(0)$  to support a maximal total biomass of  $10^4$ , and chose  
198 maturation time  $T$  so that total biomass would undergo  $\sim 6$  doublings (increasing to  $\sim 6400$ ). Thus, by  
199 the end of  $T$ ,  $\leq 70\%$  Resource would be consumed by an average community. This meant that when  
200 implemented experimentally, we could avoid complications associated with stationary phase while not  
201 wasting too much Resource.

202 Since  $T$  was relatively short ( $\sim 6$  doublings), new mutations arising during maturation would not have  
203 a chance to increase to a high enough frequency to impact community function. Thus in our selection  
204 regimens, community function would be largely determined by phenotypes of each H and M cells in the  
205 Newborn community, a point that would become important later.

## 206 Improved growth phenotypes can increase or decrease community 207 function

208 In the absence of artificial selection for high community function, natural selection drove community  
209 function to zero as expected. Specifically, when Adult communities were randomly chosen to reproduce,  
210 community function consistently declined to zero (Figure S10C) as fast-growing non-producing M ( $f_P =$   
211 0) took over (average  $f_P$  declining to zero in Figure S10B).

212 During community selection, natural selection still operates throughout community maturation. Nat-  
213 ural selection favors improved growth parameters, which can increase or decrease community function  
214 depending on, for example, the evolutionary bounds of species phenotypes. Suppose that  $g_{Hmax}$  and  
215  $g_{Mmax}$ , H and M's maximal growth rates in excess nutrients, have evolutionary upper bounds  $g_{Hmax}^*$   
216 and  $g_{Mmax}^*$ , respectively. If  $g_{Hmax}^* > g_{Mmax}^*$ , then community function could decline despite community  
217 selection (Figure 4 A, left bar  $< 1$ ). In this case, natural selection improved H's growth more than it im-  
218 proved M's growth, and consequently, communities became overwhelmingly dominated by H (Figure S13;  
219 n) and community function was low. Consistent with this observation, if growth parameters were not  
220 allowed to mutate, community function did not decline (Figure 4 A, right bar being near 1). In contrast, if  
221  $g_{Hmax}^* < g_{Mmax}^*$ , community function could improve more if growth parameters were allowed to improve  
222 compared to if growth parameters were fixed (Figure 4 B). In this case, due to the lower evolutionary  
223 upper bound of  $g_{Hmax}$  compared to that of  $g_{Mmax}$ , H did not evolve to grow so fast to overwhelm M, and  
224 as natural selection improved H and M's growth parameters (Figure S12), faster growing H generated  
225 more Byproduct, resulting in larger M populations, higher Product level and community function. Thus,  
226 the evolutionary upper bounds of species phenotypes can affect the efficacy of community selection.

227 In all following simulations, we focused on scenarios where improving growth parameters of H and  
228 M generally improves community function (e.g. Figure 4 B). This allows us to simplify the simulations



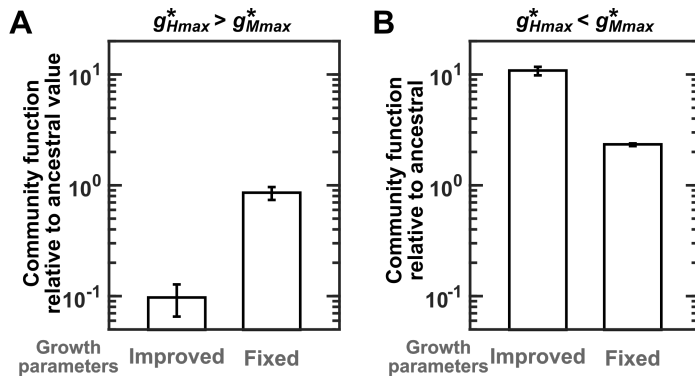

Figure 4: Improved growth parameters could (A) reduce community function or (B) improve community function depending on the evolutionary upper bounds of growth phenotypes. Each bar represents the selected community function after 1500 cycles divided by the community function of the ancestral community. Note the logarithmic scale of the y axis. (A) The evolutionary upper bound of the maximal growth rate of H exceeds that of M ( $g_{Hmax}^* = 0.8 > g_{Mmax}^* = 0.7$ ). When H and M's growth parameters were allowed to mutate, community function was lower than if growth parameters were fixed to the ancestral values (the left bar being lower than the right bar). In these simulations, since H evolved to grow very fast, we adjusted initial Resource  $R(0)$  to support  $10^5$  total biomass (higher than the standard  $10^4$  total biomass). (B) The evolutionary upper bound of the maximal growth rate of M exceeds that of H ( $g_{Hmax}^* = 0.3 < g_{Mmax}^* = 0.7$ , Table 1). When H and M's growth parameters were allowed to mutate, community function increased to a higher level compared to when growth parameters were fixed to the ancestral values (the left bar higher than the right bar). In these simulations,  $R(0)$  supported standard amount ( $10^4$ ) of total biomass. In both (A) and (B), natural selection improved growth parameters when growth parameters were allowed to mutate.

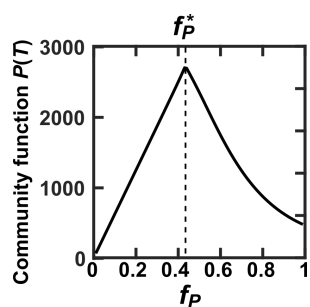

Figure 5: **An intermediate  $f_P$  is optimal for community function.** For a Newborn H-M community with a fixed total biomass  $BM(0) = BM_{target} = 100$ , supplied with a fixed Resource and excess Waste, and allowed to grow for maturation time  $T = 17$  time units, maximal  $P(T)$  is achieved at an intermediate  $f_P^* = 0.41$  (dashed line). Here the Newborn community has 54 M and 46 H cells of biomass 1, which corresponds to the species composition optimal for  $P(T)$  under these conditions. The corresponding maximal  $P^*(T)$  could not be further improved if we allowed all growth parameters and  $f_P$  to mutate (Figure S20). Thus,  $P^*(T)$  is locally maximal in the sense that small deviation will always reduce  $P(T)$ .

229 by fixing H and M's growth parameters to their upper bounds and only allowing  $f_P$  to mutate. This  
230 simplification is justified for three reasons. First, during these community selection simulations, growth  
231 parameters important to community function improved to their upper bounds (Figure S12C). Second,  
232 suppose that a mutation changes a growth parameter already at its upper bound. Since the growth  
233 parameter is already at its upper bound, the mutation can only reduce it, and thus, the mutant is disfa-  
234 vored by natural selection. And since we are studying cases where improving growth parameters improves  
235 community function, the mutant will also reduce community function and hence its host community is  
236 less likely to reproduce. Overall, the mutant will not persist which means that the growth parameter will  
237 remain at its upper bound. Third, our conclusions hold regardless of whether we fix growth parameters  
238 or not (Figure S15).

239 After fixing growth parameters, we can now focus on how  $f_P$  values of M cells evolve during commu-  
240 nity selection.  $f_P$  is of particular importance because engineered microbes pay a fitness cost to synthesize  
241 a product. An M cell with a higher  $f_P$  will grow slower than a low-producer, and thus be selected against  
242 by natural selection during community maturation. However, an M cell with higher  $f_P$  will result in higher  
243 community function, and thus its host community has a higher chance of being chosen to reproduce. As  
244 we will demonstrate, proper design of community selection regimen is critical to counter natural selection  
245 and successfully improve costly community function. Our conclusions hold even for the more difficult  
246 case of Figure 4 A where improving growth parameters reduces community function (Figure S14).

## 247 **Maximal community function is achieved at intermediate $f_P$**

248 Once we had fixed all growth parameters to their respective upper bounds ("growth-adapted" H and  
249 M), we could calculate the  $f_P$  that would yield maximal community function. An intermediate  $f_P$  value  
250 ( $f_P^* = 0.41$ ; Figure 5A) maximized community function. This is not surprising: at zero  $f_P$ , no Product  
251 would be made; at high  $f_P$ , M would go extinct (Figure 2 top panel).

## Ineffective community selection is due to non-heritable variations in community function

We simulated community selection after fixing all growth parameters to evolutionary upper bounds and allowing only  $f_P$  to be modified by mutations. As described in “Model structure,” we simulated community maturation by tracking the biomass growth of each H and M cells, cell division and death, mutation in  $f_P$  of each M cell, and metabolite release and consumption. We simulated community reproduction by incorporating stochastic fluctuations associated with volumetric dilution of the Adult community into Newborn communities using a pipette. Both  $f_P$  and community function  $P(T)$  barely improved over thousands of selection cycles, even though both were far from their theoretical maxima (Figure 6A and B). Note that community function was above the ancestral value ((Figure 6B, brown star) because growth parameters were fixed to evolutionary upper bounds.

To understand why community selection failed to improve community function, we examine the heredity of the community function through identifying the determinants of the community function and examining whether these determinants are heritable. The community function of an H-M community is largely determined by phenotypes of each H and M cells in the Newborn community. This is because we had chosen a sufficiently short maturation time such that new genotypes arising during maturation could not rise to high frequency. The phenotypes of each H and M cells in the Newborn community can be approximated by the following three independent determinants of the community function: Newborn’s total biomass  $BM(0)$ , Newborn’s fraction of M biomass  $\phi_M(0)$ , and the average  $f_P$  over all M cells in Newborn  $\bar{f}_P(0)$  (Eq 6-10). Note that because the composition of a community varies as it goes from its Newborn stage to its Adult stage, these determinants are all defined at a community’s Newborn stage. A determinant is considered heritable if the determinant of a parent community (e.g. the red tube from the top row of Figure 3) and the determinants of its offspring communities (red tubes from the bottom row of Figure 3) are correlated. Among the three determinants,  $\bar{f}_P(0)$  can be considered “heritable” as shown in Figure S29: if a parent community has a high  $\bar{f}_P(0)$ , i.e. a high average  $f_P$  at its Newborn stage, it will have a high average  $f_P$  at its Adult stage. Since its offspring communities inherit its M cells, they will have high  $\bar{f}_P(0)$ . On the other hand, Newborn total biomass  $BM(0)$  is not heritable since it is not correlated between a parent community and its offspring communities, as shown in Figure S29. This is because when an Adult community reproduced, the dilution factor was adjusted so that the total biomass of an offspring Newborn community was on average the constant target biomass  $BM_{target}$ . The fraction of M biomass of a Newborn  $\phi_M(0)$  is not heritable either, as shown in Figure S29. This is because although the fractions of M biomass of offspring Newborn communities are correlated with the fractions of M biomass of their parent community at Adult stage, the fractions of M biomass of a community at its Adult stage is not correlated with its fractions of M biomass at Newborn stage. As shown in the lower panel of Figure 2 between time 0 and  $T$ , different fractions of M biomass in the Newborn communities  $\phi_M(0)$  approach a common steady-state value as they reach their Adult stages due to ecological interactions.

In successful community selection, higher community function should correlate with higher average Newborn  $f_P$  ( $\bar{f}_P(0)$ ), because the latter is the heritable determinant of the former. However, we observed little correlation between community function  $P(T)$  and  $\bar{f}_P(0)$ , but strong correlation between community function and its non-heritable determinants (Figure 7). For example, the Newborn that would achieve the highest function (left magenta dot) had a below-median  $\bar{f}_P(0)$ , but had high total biomass  $BM(0)$  and low fraction of M biomass  $\phi_M(0)$ . The reason for strong correlations between  $P(T)$  and the two non-heritable determinants became clear by examining community dynamics. We had chosen maturation time so that Resource was in excess to avoid stationary phase. Thus, when a Newborn started with a higher-than-average total biomass (dotted lines in top panels of Figure S24),

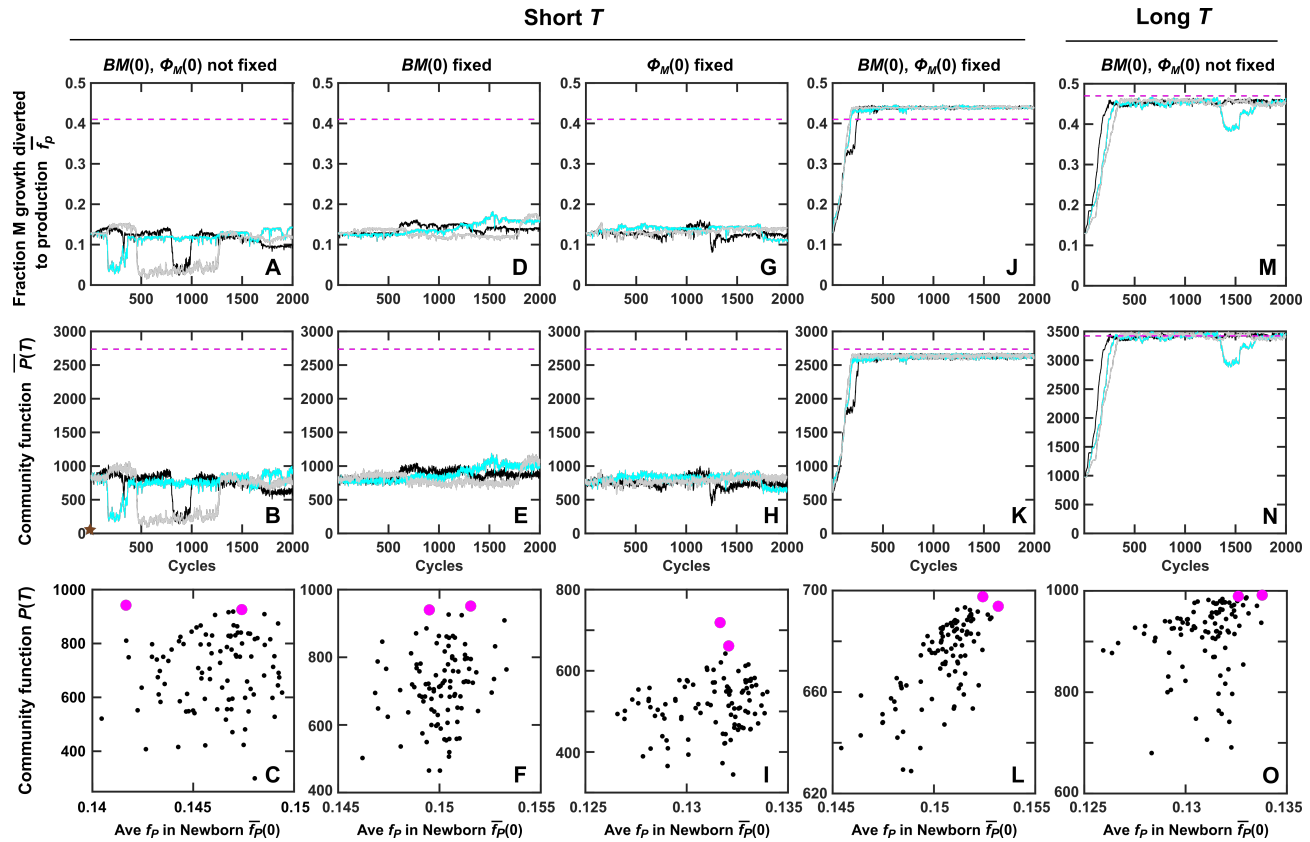

Figure 6: **Community selection succeeds when controlling the right experimental variables.** (A-H) Dynamics of selected communities at short maturation time  $T$  ( $T = 17$ , where on average 60% Resource is consumed by the end of  $T$  to avoid stationary phase). The growth parameters of H and M are fixed at upper bounds, and  $f_P$  starts at  $f_{P, Mono}^* = 0.13$  (Figure S21B). (A-C)  $BM(0)$  and  $\phi_M(0)$  are allowed to fluctuate around  $BM_{target} = 100$  and  $\phi_M(T)$  of the previous cycle (e.g. pipetting and diluting a portion of the selected Adult into Newborns). (J-L)  $BM(0)$  and  $\phi_M(0)$  are fixed to  $BM_{target} = 100$  and  $\phi_M(T)$  of the previous cycle (e.g. sorting a fixed H biomass and M biomass into Newborns). This allows community function to improve. (D-I) Fixing either  $BM(0)$  or  $\phi_M(0)$  does not significantly improve community selection. (M-O) Selection dynamics at longer  $T = 20$ . Community function improves under selection even without fixing  $BM(0)$  or  $\phi_M(0)$ . Magenta dashed lines:  $f_P^*$  optimal for  $P(T)$  and maximal  $P^*(T)$  when all five growth parameters are fixed at their upper bounds and  $\phi_M(0)$  is optimal for community function. Black, cyan and gray curves are three independent simulation trials.  $\bar{P}(T)$  is averaged across the two selected Adults and has the unit of  $\bar{r}_P$ , and  $\bar{f}_P$  is obtained by averaging within each selected Adult and then averaging across the two selected Adults.

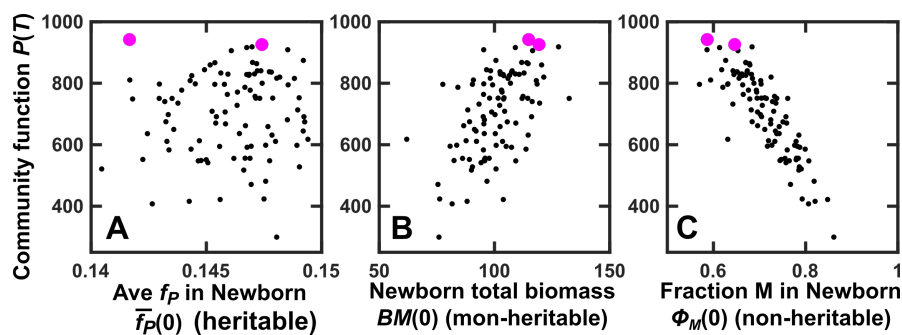

Figure 7: **When community selection is ineffective, community function correlates weakly with its heritable determinant and strongly with non-heritable determinants.** From community selection simulation, we randomly chose a selection cycle where 100 Newborns matured into 100 Adults. We plotted community function  $P(T)$  of each Adult against characteristics of its corresponding Newborn community that determine community function. Each dot represents one community, and the two magenta dots indicate the two “successful” Newborns that achieved the highest community function at adulthood. (A)  $P(T)$  only weakly correlates with  $\bar{f}_P(0)$  ( $f_P$  averaged over all M individuals in a Newborn). (B-C)  $P(T)$  strongly correlates with Newborn total biomass  $BM(0)$  and Newborn fraction of M biomass  $\phi_M(0)$ .

298 higher-than-average M biomass would more thoroughly convert Resource (and Byproduct) to Product.  
299 Similarly, if a Newborn started with higher-than-average fraction of H biomass (dotted lines in bottom  
300 panels of Figure S24), then H would produce higher-than-average Byproduct which meant that M would  
301 endure a shorter growth lag, and make more Product.

302 In summary, variation in community function was dominated by variations in non-heritable determi-  
303 nants including Newborn total biomass  $BM(0)$  and fraction of M biomass  $\phi_M(0)$ . This interfered with  
304 selection on  $\bar{f}_P(0)$ , the heritable determinant of community function. Consequently, selection failed to  
305 improve  $P(T)$  (Figure 6B).

## 306 Reducing non-heritable variations promotes artificial community 307 selection

308 Reducing non-heritable variations in community function should enable community selection to work.  
309 One possibility is to reduce the stochastic fluctuations in non-heritable determinants  $BM(0)$  and  $\phi_M(0)$ .  
310 Indeed, when each Newborn received a fixed biomass of H and M (Methods, Section 6),  $P(T)$  became  
311 strongly correlated with  $\bar{f}_P(0)$  (Figure 6L). In this case, both  $\bar{f}_P$  and community function  $P(T)$  improved  
312 under selection (Figure 6, J and K) to near the optimal. Note that allocating a fixed biomass of fluorescent  
313 cells to Newborn communities could be experimentally realized by using a cell sorter since biomass scales  
314 with fluorescence intensity [35].  $P(T)$  improvement was not seen if either Newborn total biomass or  
315 species fraction was allowed to fluctuate stochastically (Figure 6, D-I).  $P(T)$  also improved (Figure S25)  
316 if fixed numbers of H and M cells (instead of biomass) were allocated into each Newborn (Methods,  
317 Section 6).

318 Non-heritable variations in  $P(T)$  could also be curtailed by reducing the dependence of  $P(T)$  on  
319 non-heritable determinants. For example, we could extend the maturation time  $T$  to nearly deplete  
320 Resource. In this selection regimen, Newborns would still experience stochastic fluctuations in Newborn  
321 total biomass  $BM(0)$  and fraction of M biomass  $\phi_M(0)$ . However all communities would end up with

322 similar  $P(T)$  since “unlucky” communities would have time to “catch up” as “lucky” communities wait in  
323 stationary phase. Indeed, with extended  $T$ , community function improved without having to fix  $BM(0)$   
324 or  $\phi_M(0)$  (Figure 6, M and N). However, stochastic fluctuations in  $BM(0)$  and  $\phi_M(0)$  could still cause  
325 non-heritable variations in community function by causing stochastic fluctuations in, for example, the  
326 duration of stationary phase (and thus cell survival or the length of recovery time).

327 As expected, the effectiveness of community selection depends on the uncertainty of community  
328 function measurements - another source of non-heritable variations. To test how measurement uncer-  
329 tainty affects community selection, we added to each  $P(T)$  a random number drawn from a normal  
330 distribution with mean of zero and standard deviation of 5% of the ancestral  $P(T)$ . In this case, when  
331 we fixed  $BM(0)$  and  $\phi_M(0)$ , community function improved, although at a slower rate than no measure-  
332 ment uncertainty (compare Figure S31 left panel with Figure 6 J & K). When measurement uncertainty  
333 doubled to 10%, community selection failed (Figure S31 right panel). Thus, multiple measurements of  
334 community function to reduce measurement uncertainty can make community selection more effective.

335 In summary, non-heritable variations in community function must be sufficiently suppressed for com-  
336 munity selection to work. During community selection, seemingly innocuous experimental procedures  
337 such as pipetting could be problematic, and a more precise procedure such as cell sorting might be  
338 required. Our conclusions held when we used a different mutation rate ( $2 \times 10^{-5}$  instead of  $2 \times 10^{-3}$   
339 mutation per cell per generation per phenotype, Figure S26), a different distribution of mutation effects  
340 (a non-null mutation increased or decreased  $f_P$  by on average 2%, Figure S27), or incorporating epistasis  
341 (a non-null mutation would likely reduce  $f_P$  if the current  $f_P$  was high, and enhance  $f_P$  if the current  $f_P$   
342 was low; Figure S28; Figure S9; Methods Section 5). Our conclusions also hold when improved growth  
343 parameters can reduce community function (Figure S14). We have also modeled a mutualistic H-M  
344 community where Byproduct was inhibitory to H. Thus, H benefited M by providing Byproduct, and M  
345 benefited H by removing Byproduct, similar to the syntrophic community of *Desulfovibrio vulgaris* and  
346 *Methanococcus maripaludis* [36]. We obtained similar conclusions in this mutualistic H-M community  
347 (Figure S30). Thus, our conclusions seem general.

## 348 Discussions

349 How might we improve functions of multi-species microbial communities via artificial selection? A  
350 common approach is to identify the appropriate combination of species types [8, 9, 12, 11, 15]. However,  
351 if we solely rely on species types, then without a constant influx of new species, community function will  
352 likely level off quickly [10]. Here, we consider artificial selection of communities with defined member  
353 species so that community function improves by new genotypes, particularly new genotypes that reduce  
354 individual growth rate and are thus disfavored by natural selection.

355 Pre-optimizing member species in monocultures may not lead to maximal community function due  
356 to difficulties in recapitulating community dynamics in monocultures. For example, we could start with  
357 H and M with all growth parameters at respective upper bounds, since within our parameter ranges,  
358 improving H and M growth generally improves community function (Figures S12 and S16). We could  
359 then improve M's  $f_P$  by group selection (Figure S1B). Specifically, we could start with  $n_{tot}$  of 100  
360 Newborn M groups, each inoculated with one M cell (to facilitate group selection, Figure S1B bottom  
361 panel) [37]. We would supply each Newborn M group with the same amount of Resource as we would  
362 for H-M communities. Since it is difficult to reproduce community Byproduct dynamics in M groups,  
363 for simplicity we would supply excess Byproduct to Newborn M groups <sup>1</sup>.  $f_P$  optimal for monoculture

<sup>1</sup>Since Newborn groups start with a single M individual, artificial group selection here can also be viewed as artificial

364  $P(T)$  occurred at an intermediate value ( $f_{P, Mono}^* = 0.13$ ; Figure S21). Consistent with this calculation,  
365 in simulations of M-group selection,  $f_P$  gradually increased to  $f_{P, Mono}^* = 0.13$  (Figure S22). However,  
366  $f_P$  optimal for monoculture  $P(T)$  is much lower than  $f_P$  optimal for community  $P(T)$  (Figure 5; see  
367 Methods Section 8 for an explanation).

368 Artificial selection of whole communities to improve a costly community function requires careful  
369 considerations on species choice (Figure 4), mutation rate, the total number of communities under  
370 selection, Newborn target total biomass, the amount of Resource added to each Newborn, and maturation  
371 time, as we have described in “Parameters of selection regimen”. In addition, how we pre-grow M cells in  
372 preparation for inoculating Newborn communities for the first cycle can also affect community selection.  
373 Suppose that we grow up one master culture from a single cell over 23 generations (to a population size  
374 of  $\sim 10^7$  which generates enough turbidity in 1-mL cultures) where mutations in  $f_P$  can occur during  
375 any time, and distribute  $\sim 60$  cells into each of 100 Newborns. Then, there is a  $\sim 17\%$  chance that all  
376 Newborns would contain at least 1 non-producing M cell. In contrast, if we grow up 100 cultures, and  
377 use one culture to inoculate one Newborn, then this chance reduces below 0.01%. However, these two  
378 arrangements resulted in almost identical evolutionary dynamics of average  $f_P$  and  $P(T)$  (Figure S32).

379 In certain regards, community selection is similar to selection of mono-species groups. Group selection,  
380 and in a related sense, kin selection [38, 39, 40, 41, 42, 43, 44, 45, 46, 47, 48, 49, 50, 51, 52], have been  
381 extensively examined to explain, for example, the evolution of traits that lower individual fitness (e.g.  
382 sterile ants) but increase the success of a group<sup>2</sup>. In both group selection and community selection,  
383 Newborn size must not be too large [37, 58] and maturation time must not be too long. Otherwise,  
384 all entities (groups or communities) will accumulate non-producers in a similar fashion, and this low  
385 inter-entity variation impedes selection (Price equation [59]; Figure S1).

386 Community selection and group selection differ in two aspects. First, species interactions in a com-  
387 munity could drive species composition to a value sub-optimal for community function ([60]). This  
388 problem does not exist for group selection especially when a group does not differentiate into interacting  
389 subgroups. Second, in group selection, when a Newborn group starts with a small number of individuals,  
390 a fraction of Newborn groups of the next cycle will show high heredity to the original Newborn group  
391 (Figure S1B, bottom panel). This facilitates group selection. In contrast, when a Newborn community  
392 starts with a small number of total individuals, large stochastic fluctuations in Newborn composition can  
393 interfere with community selection (Figure 6). In the extreme case, a member species may even be lost  
394 by chance. Even if a fixed biomass of each species is sorted into Newborns, heredity is much reduced in  
395 community selection due to random sampling of genotypes from member species<sup>3</sup>.

396 Although suppressing non-heritable variations in a trait will always increase selection efficacy, here  
397 we show that for community selection, large non-heritable variations in community function can readily  
398 arise during routine experimental procedures such as pipetting. For example, at a target total biomass  
399 of 100 ( $\sim 70$  cells of average biomass 1.5) and excess Resource, pipetting a volume of an Adult to

---

individual selection where the trait under selection is an individual M’s ability to make Product over time  $T$  as the individual grows into a population.

<sup>2</sup>Group selection is often applied in a broader sense to spatially-structured populations to explain the evolution of cooperative traits [53, 54]. In these cases, individuals form groups. Within each cycle, individuals grow based on their genotype (e.g. cooperators or cheaters) and group environment (cooperator-dominated or cheater-dominated). At the end of each cycle, individuals migrate among groups. However, if there are no births or deaths of groups, then selection acts on individuals instead of on groups [55, 56, 57].

<sup>3</sup>For example, if Newborn groups are initiated with a single cooperator and if the highest-functioning Adult group has accumulated 50% cheaters, then 50% Newborns of the next cycle will be initiated with a single cooperator. In contrast, if a Newborn community starts with a single cooperator from each of the two species and if the highest-functioning Adult has accumulated 50% cheaters in each species, then only  $50\% \times 50\% = 25\%$  Newborns of the next cycle will be initiated with pure cooperators.

seed a Newborn could already introduce non-heritable variations in community function (Figure 7B-C) sufficiently large to impede selection (Figure 6A-B). In contrast, if each Newborn received a fixed biomass of each species (via cell sorting for example), then community function rapidly improved (Figure 6J and K). If maturation time  $T$  was extended so that Resource would on average be nearly depleted by the end of  $T$ , then community function also improved (Figure 6M and N), provided that variations in stationary phase duration would not generate large, non-heritable variations in community function. Similar conclusions hold when we varied model assumptions by using a lower mutation rate (Figure S26), employing a different distribution of mutation effects (Figure S27), considering epistasis (Figure S28), and modeling mutualistic H-M communities (Figure S30).

In the work of [8], authors tested two selection regimens with Newborn sizes differing by 100-fold. The authors hypothesized that smaller Newborns would have a high level of variation which should facilitate selection. However, the hypothesis was not corroborated by experiments, and as a possible explanation, the authors invoked the “butterfly effect” (the sensitivity of chaotic systems to initial conditions). Our results suggest that even for non-chaotic systems like the H-M community, selection could fail due to interference from non-heritable variations. This is because in Newborns with small sizes, fluctuations in community composition can be large, which compromises heritability of community trait.

A general ramification of our theory is that before launching a selection experiment, one should experimentally evaluate non-heritable variations in community function. One could initiate replicate Newborns using the most precise method (e.g. via cell sorting). Even at identical initial conditions, some levels of non-heritable variations in community function are inevitable. These can be caused by, for example, non-genetic phenotypic variations among cells [61], stochasticity in cell birth and death, and noise in community function measurements. If “noises” (variations among replicate communities) are small compared to “signals” (variations among communities with different levels of community function), then one can test less precise procedures (e.g. cell culture pipetting during community reproduction).

Microbes can co-evolve with each other and with their host in nature [62, 63, 64]. Some have proposed that complex microbial communities such as the gut microbiota could serve as a unit of selection [14]. Our work suggests that if selection for a costly microbial community function should occur in nature, then mechanisms for suppressing non-heritable variations in community function should be in place.

## Methods

### 1 Equations

$H$ , the biomass of H, changes as a function of growth and death,

$$\frac{dH}{dt} = g_H(\hat{R})H - \delta_H H \quad (1)$$

Grow rate  $g_H$  depends on the level of Resource  $\hat{R}$  (hat  $\hat{\phantom{x}}$  representing pre-scaled value) as described by the Monod growth model (Figure S4)

$$g_H(\hat{R}) = g_{Hmax} \frac{\hat{R}}{\hat{R} + \hat{K}_{HR}}$$

where  $\hat{K}_{HR}$  is the  $\hat{R}$  at which  $g_{Hmax}/2$  is achieved.  $\delta_H$  is the death rate of H. Note that since Waste is in excess, Waste level does not change and thus does not enter the equation.

$M$ , the biomass of M, changes as a function of growth and death,



$$\frac{dM}{dt} = (1 - f_P) g_M(\hat{R}, \hat{B})M - \delta_M M \quad (2)$$

436 Total potential growth rate of M  $g_M$  depends on the levels of Resource and Byproduct ( $\hat{R}$  and  $\hat{B}$ )  
 437 according to the Mankad-Bungay model [25] due to its experimental support (Figure S5):

$$g_M(\hat{R}, \hat{B}) = g_{Mmax} \frac{\hat{R}_M \hat{B}_M}{\hat{R}_M + \hat{B}_M} \left( \frac{1}{\hat{R}_M + 1} + \frac{1}{\hat{B}_M + 1} \right)$$

438 where  $\hat{R}_M = \hat{R}/\hat{K}_{MR}$  and  $\hat{B}_M = \hat{B}/\hat{K}_{MB}$  (Figure S4).  $1 - f_P$  fraction of M growth is channeled to  
 439 biomass increase.  $f_P$  fraction of M growth is channeled to making Product:

$$\frac{d\hat{P}}{dt} = \tilde{r}_P f_P g_M(\hat{R}, \hat{B})M \quad (3)$$

440 where  $\tilde{r}_P$  is the amount of Product made at the cost of one M biomass (tilde  $\sim$  representing scaling  
 441 factor, see below and Table 1).

442 Resource  $\hat{R}$  is consumed proportionally to the growth of M and H; Byproduct  $\hat{B}$  is released propor-  
 443 tionally to H growth and consumed proportionally to M growth:

$$\frac{d\hat{R}}{dt} = -\hat{c}_{RM} g_M(\hat{R}, \hat{B})M - \hat{c}_{RH} g_H(\hat{R})H \quad (4)$$

$$\frac{d\hat{B}}{dt} = \tilde{r}_B g_H(\hat{R})H - \hat{c}_{BM} g_M(\hat{R}, \hat{B})M \quad (5)$$

444 Here,  $\hat{c}_{RM}$  and  $\hat{c}_{RH}$  are the amounts of  $\hat{R}$  consumed per potential M biomass and H biomass, respectively.  
 445  $\hat{c}_{BM}$  is the amount of  $\hat{B}$  consumed per potential M biomass.  $\tilde{r}_B$  is the amount of  $\hat{B}$  released per H  
 446 biomass grown. Our model assumes that Byproduct or Product is generated proportionally to H or M  
 447 biomass grown, which is reasonable given the stoichiometry of metabolic reactions and experimental  
 448 support [65]. The volume of community is set to be 1, and thus cell or metabolite quantities (which are  
 449 considered here) are numerically identical to cell or metabolite concentrations.

450 In equations above, scaling factors are marked by “ $\sim$ ”, and will become 1 after scaling. Variables and  
 451 parameters with hats will be scaled and lose their hats afterwards. Variables and parameters without  
 452 hats will not be scaled. We scale Resource-related variable ( $\hat{R}$ ) and parameters ( $\hat{K}_{MR}$ ,  $\hat{K}_{HR}$ ,  $\hat{c}_{RM}$ ,  
 453 and  $\hat{c}_{RH}$ ) against  $\tilde{R}(0)$  (Resource supplied to Newborn), Byproduct-related variable ( $\hat{B}$ ) and parameters  
 454 ( $\hat{K}_{MB}$  and  $\hat{c}_{BM}$ ) against  $\tilde{r}_B$  (amount of Byproduct released per H biomass grown), and Product-related  
 455 variable ( $\hat{P}$ ) against  $\tilde{r}_P$  (amount of Product made at the cost of one M biomass). For biologists who  
 456 usually think of quantities with units, the purpose of scaling (and getting rid of units) is to reduce the  
 457 number of parameters. For example, H biomass growth rate can be re-written as:

$$\begin{aligned} g_H(\hat{R}) &= g_{Hmax} \frac{\hat{R}}{\hat{R} + \hat{K}_{HR}} \\ &= g_{Hmax} \left( \frac{\hat{R}}{\tilde{R}(0)} \right) \bigg/ \left( \frac{\hat{R}}{\tilde{R}(0)} + \frac{\hat{K}_{HR}}{\tilde{R}(0)} \right) \\ &= \frac{g_{Hmax}}{R} \frac{R}{(R + K_{HR})} \\ &= g_H(R) \end{aligned}$$

458 where  $R = \hat{R}/\tilde{R}(0)$  and  $K_{HR} = \hat{K}_{HR}/\tilde{R}(0)$ . Thus, the unscaled  $g_H(\hat{R})$  and the scaled  $g_H(R)$  share  
 459 identical forms. After scaling, the value of  $\tilde{R}(0)$  becomes irrelevant (1 with no unit). Similarly, since  
 460  $\hat{R}_M = \frac{\hat{R}}{\tilde{R}(0)} / \frac{\hat{K}_{MB}}{\tilde{R}(0)} = \frac{R}{K_{MR}} = R_M$  and  $\hat{B}_M = \frac{\hat{B}}{\tilde{r}_B} / \frac{\hat{K}_{MB}}{\tilde{r}_B} = \frac{B}{K_{MB}} = B_M$ ,  $g_M(\hat{R}, \hat{B}) = g_M(R, B)$ .

461 Thus, scaled equations are

$$\frac{dH}{dt} = g_H(R)H - \delta_H H \quad (6)$$

$$\frac{dM}{dt} = (1 - f_P) g_M(R, B)M - \delta_M M \quad (7)$$

$$\begin{aligned} \frac{dP}{dt} &= \frac{d\hat{P}}{\tilde{r}_P dt} \\ &= f_P g_M(\hat{R}, \hat{B})M \\ &= f_P g_M(R, B)M \end{aligned} \quad (8)$$

$$\begin{aligned} \frac{dR}{dt} &= \frac{d\hat{R}/\tilde{R}(0)}{dt} \\ &= -\frac{\hat{c}_{RM}}{\tilde{R}(0)} g_M(\hat{R}, \hat{B})M - \frac{\hat{c}_{RH}}{\tilde{R}(0)} g_H(\hat{R})H \\ &= -c_{RM} g_M(R, B)M - c_{RH} g_H(R)H \end{aligned} \quad (9)$$

$$\begin{aligned} \frac{dB}{dt} &= \frac{d\hat{B}/\tilde{r}_B}{dt} \\ &= g_H(\hat{R})H - \frac{\hat{c}_{BM}}{\tilde{r}_B} g_M(\hat{R}, \hat{B})M \\ &= g_H(R)H - c_{BM} g_M(R, B)M \end{aligned} \quad (10)$$

462 We have not scaled time here, although time can also be scaled by, for example, the community  
 463 maturation time. Here, time has the unit of unit time (e.g. hr), and to avoid repetition, we often drop  
 464 the time unit. After scaling, values of all parameters (including scaling factors) are in Table 1, and  
 465 variables in our model and simulations are summarized in Table 2.

466 For this H-M community, the species ratio at time  $T$  at can be estimated in the following manner.

467 From Eq. 10:

$$\int_0^T \frac{dB}{dt} dt = \int_0^T g_H(R)H dt - \int_0^T c_{BM} g_M(R, B)M dt. \quad (11)$$

468 If we approximate Eq. 6-7 by ignoring the death rates so that  $\frac{dH}{dt} \approx g_H(R)H$  and  $\frac{dM}{dt} \approx (1 - f_P) g_M(R, B)M$ ,  
 469 Eq. 11 becomes

$$B(T) \approx \int_0^T \frac{dH}{dt} dt - \frac{c_{BM}}{1 - f_P} \int_0^T \frac{dM}{dt} dt. \quad (12)$$

470 If B is the limiting factor for the growth of M so that B is mostly depleted, we can approximate  
 471  $B \approx 0$ . If  $T$  is large enough so that both M and H has multiplied significantly and  $H(T) \gg H(0)$  and  
 472  $M(T) \gg M(0)$ , Eq. 12 becomes

$$H(T) - H(0) - \frac{c_{BM}}{1 - f_P} (M(T) - M(0)) \approx H(T) - \frac{c_{BM}}{1 - f_P} M(T) \approx 0,$$

473 the M:H ratio at time  $T$  is

$$\frac{M(T)}{H(T)} \approx \frac{1 - f_P}{c_{BM}}. \quad (13)$$

474 If Newborn inherits parent Adult's  $\phi_M$ , then the steady state  $\phi_{M,SS}$  is

$$\phi_{M,SS} \approx \frac{1 - f_P}{1 - f_P + c_{BM}}. \quad (14)$$

475 In our simulations, because we supplied the H-M community with abundant R to avoid stationary  
 476 phase, H grows almost at the maximal rate through  $T$  and releases B. If  $f_P$  is not too large ( $f_P < 0.4$ ),  
 477 which is satisfied in our simulations, M grows at a maximal rate allowed by B and keeps B at a low  
 478 level. Thus, Eq. 14 is applicable and predicts the steady-state  $\phi_{M,SS}$  well (see Figure S7). Note that  
 479 significant deviation occurs when  $f_P > 0.4$ . This is because when  $f_P$  is large, M's biomass does not  
 480 grow fast enough to deplete B so that we cannot approximate  $B(T) \approx 0$  anymore.

## 481 2 Parameter choices

482 Our parameter choices are based on experimental measurements from a variety of organisms. Additionally,  
 483 we choose growth parameters (maximal growth rates and affinities for metabolites) of ancestral and  
 484 evolved H and M so that 1) the two species can coexist for a range of  $f_P$  during evolution and 2)  
 485 improving all growth parameters up to their evolutionary upper bounds generally improves community  
 486 function (Methods Section 3). This way, we could start with communities of H and M whose growth  
 487 parameters are already maximized ("growth-adapted"), since mutations that reduce growth parameters  
 488 will be selected against by both natural selection and community selection. In other words, only  $f_P$  can  
 489 mutate, and higher  $f_P$  will be favored by community selection but disfavored by natural selection. With  
 490 only one mutable parameter ( $f_P$ ), we can identify the optimal  $f_{P^*}$  associated with maximal community  
 491 function (Figure 5). Evolutionary modeling is also greatly simplified.

492 For ancestral H, we set  $g_{Hmax} = 0.25$  (equivalent to 2.8-hr doubling time if we choose hr as the time  
 493 unit),  $K_{HR} = 1$  and  $c_{RH} = 10^{-4}$  (both with unit of  $\tilde{R}(0)$ ) (Table 1). This way, ancestral H can grow by  
 494 about 10-fold by the end of  $T = 17$ . These parameters are biologically realistic. For example, for a *lys-*  
 495 *S. cerevisiae* strain with lysine as Resource, un-scaled Monod constant is  $\hat{K} = 1 \mu\text{M}$ , and consumption  $\hat{c}$   
 496 is 2 fmole/cell (Ref. [24], Figure 2 Source Data 1; bioRxiv). Thus, if we choose 10  $\mu\text{L}$  as the community  
 497 volume  $\hat{V}$  and 2  $\mu\text{M}$  as the initial Resource concentration, then  $\tilde{R}(0) = 2 \times 10^4$  fmole. After scaling,  
 498  $K = \hat{K}\hat{V}/\tilde{R}(0) = 0.5$  and  $c = \hat{c}/\tilde{R}(0) = 10^{-4}$ , similar to values in Table 1.

499 To ensure the coexistence of H and M, M must grow faster than H for part of the maturation cycle.  
 500 Since we have assumed M and H to have the same affinity for R (Table 1),  $g_{Mmax}$  must exceed  $g_{Hmax}$   
 501 (Figure 1), and M's affinity for Byproduct ( $1/K_{MB}$ ) must be sufficiently large. Moreover, Byproduct  
 502 consumed per Manufacturer biomass must be neither too small nor too large so that the steady state M:H  
 503 is not extreme. Thus for ancestral M, we choose  $g_{Mmax} = 0.58$  (equivalent to a doubling time of 1.2 hrs).  
 504 We set  $c_{BM} = \frac{1}{3}$  (units of  $r_B$ ), meaning that Byproduct released during one H biomass growth is sufficient  
 505 to generate 3 M biomass, which is biologically achievable ([23, 66]). When we choose  $K_{MB} = \frac{5}{3} \times 10^2$

|                | Definition                                                                                      | Ancestral                                | Evolved                      |
|----------------|-------------------------------------------------------------------------------------------------|------------------------------------------|------------------------------|
| $\tilde{r}_B$  | amount of $\hat{B}$ released per H biomass grown                                                | scaling factor, 1                        | no change                    |
| $\tilde{r}_P$  | amount of $\hat{P}$ released at the cost of one M biomass                                       | scaling factor, 1                        | no change                    |
| $\tilde{R}(0)$ | initial amount of Resource in Newborn                                                           | scaling factor, 1                        |                              |
| $f_P$          | fraction of M growth diverted to producing P                                                    | 0.10                                     | 0.13#                        |
| $K_{MR}$       | fold of $\tilde{R}(0)$ at which $g_{Mmax}/2$ is achieved in excess B                            | 1                                        | 1/3*                         |
| $K_{MB}$       | amount of $\hat{B}$ at which $g_{Mmax}/2$ is achieved in excess R, scaled against $\tilde{r}_B$ | $\frac{5}{3} \times 10^2$                | $\frac{1}{3} \times 10^{2*}$ |
| $K_{HR}$       | fold of $\tilde{R}(0)$ at which $g_{Hmax}/2$ is achieved                                        | 1                                        | 1/5*                         |
| $g_{Mmax}$     | maximal biomass growth rate of M                                                                | 0.58/unit time                           | 0.7*                         |
| $g_{Hmax}$     | maximal biomass growth rate of H                                                                | 0.25/unit time                           | 0.3*                         |
| $\delta_M$     | death rate of M                                                                                 | $3.5 \times 10^{-3}$ /unit time          | no change                    |
| $\delta_H$     | death rate of H                                                                                 | $1.5 \times 10^{-3}$ /unit time          | no change                    |
| $c_{RM}$       | fraction of $\tilde{R}(0)$ consumed per M biomass grown                                         | $10^{-4}$                                | no change                    |
| $c_{RH}$       | fraction of $\tilde{R}(0)$ consumed per H biomass grown                                         | $10^{-4}$                                | no change                    |
| $c_{BM}$       | amount of $\hat{B}$ consumed per M biomass grown, scaled against $\tilde{r}_B$                  | $\frac{1}{3}$                            | no change                    |
| $P_{mut}$      | mutation probability per cell division for each mutable phenotype                               | $2 \times 10^{-5} \sim 2 \times 10^{-3}$ |                              |

Table 1: Parameters for ancestral and evolved (growth- and mono-adapted) H and M. Parameters in the ‘‘Ancestral’’ column are used for Figure S12, while those in the ‘‘Evolved’’ column are used for all other figures. For maximal growth rates, \* represents evolutionary upper bound. For  $K_{SpeciesMetabolite}$ , \* represents evolutionary lower bound, which corresponds to evolutionary upper bound for Species’s affinity for Metabolite ( $1/K_{SpeciesMetabolite}$ ). # is from Figure 5B. In Methods Section 2, we explain our parameter choices (including why we hold some parameters constant during evolution).

| Symbols               | Definition                                                                             |
|-----------------------|----------------------------------------------------------------------------------------|
| $M(t), H(t)$          | The biomass of M or H in a community at time $t$                                       |
| $BM(t) = M(t) + H(t)$ | The total biomass in a community at time $t$                                           |
| $\phi_M(t)$           | The fraction of M biomass at time $t$                                                  |
| $BM_{target}$         | Pre-set target total biomass of Newborns during community reproduction                 |
| $I_M(t), I_H(t)$      | The integer number of M or H cells in a community at time $t$                          |
| $\varphi_M(t)$        | The fraction of M individuals at time $t$                                              |
| $L_M(t), L_H(t)$      | The biomass (length) of an individual M or H cell at time $t$ , ranged between 1 and 2 |
| $P(t)$                | The amount of Product P in a community at time $t$ , scaled by $\tilde{r}_P$           |
| $R(t)$                | The amount of Resource R in a community at time $t$ , scaled by $\tilde{R}(0)$         |
| $B(t)$                | The amount of Byproduct B in a community at time $t$ , scaled by $\tilde{r}_B$         |
| $n_{dil}$             | The fold dilution when reproducing an Adult community                                  |
| $n_{tot}$             | Total number of communities under selection                                            |
| $T$                   | Community maturation time, corresponding to the duration of a selection cycle          |

Table 2: A summary of variables used in the simulation.

506 (units of  $\tilde{r}_B$ ), H and M can coexist for a range of  $f_P$  (Figure 1). This value is biologically realistic. For  
507 example, suppose that H releases hypoxanthine as Byproduct. A hypoxanthine-requiring *S. cerevisiae* M  
508 strain evolved under hypoxanthine limitation could achieve a Monod constant for hypoxanthine at 0.1  
509  $\mu\text{M}$  (bioRxiv). If the volume of the community is 10  $\mu\text{L}$ , then  $K_{MB} = \frac{5}{3} \times 10^2$  (units of  $\tilde{r}_B$ ) corresponds  
510 to an absolute release rate  $\tilde{r}_B = 0.1 \mu\text{M} \times 10 \mu\text{L} / (\frac{5}{3} \times 10^2) = 6$  fmole per releaser biomass born. At 8  
511 hour doubling time, this translates to 6 fmole/(1 cell  $\times$  8 hr)  $\approx$  0.75 fmole/cell/hr, within the ballpark of  
512 experimental observation ( $\sim$ 0.3 fmole/cell/hr, bioRxiv). As a comparison, a lysine-overproducing yeast  
513 strain reaches a release rate of 0.8 fmole/cell/hr (bioRxiv) and a leucine-overproducing strain reaches  
514 a release rate of 4.2 fmole/cell/hr ([66]). Death rates  $\delta_H$  and  $\delta_M$  are chosen to be 0.5% of H and  
515 M's respective upper bound of maximal growth rate, which are within the ballpark of experimental  
516 observations (e.g. the death rate of a *lys-* strain in lysine-limited chemostat is 0.4% of maximal growth  
517 rate, bioRxiv).

518 We assume that H and M consume the same amount of R per new cell ( $c_{RH} = c_{RM}$ ) since the biomass  
519 of various microbes share similar elemental (e.g. carbon or nitrogen) compositions [67]. Specifically,  
520  $c_{RH} = c_{RM} = 10^{-4}$  (units of  $\tilde{R}(0)$ ), meaning that input Resource can yield a maximum of  $10^4$  total  
521 biomass.

522 In initial simulations, growth parameters (maximal growth rates  $g_{Mmax}$  and  $g_{Hmax}$  and affinities for  
523 nutrients  $1/K_{MR}$ ,  $1/K_{MB}$ , and  $1/K_{HR}$ ) and production cost parameter ( $f_P \in [0, 1]$ ) are allowed to  
524 change during evolution, since these phenotypes have been observed to rapidly evolve within tens to  
525 hundreds of generations ([27, 28, 29, 30]). For example, several-fold improvement in nutrient affinity  
526 [28] and  $\sim$ 20% increase in maximal growth rate [30] have been observed in experimental evolution. Thus  
527 we allow affinities  $1/K_{MR}$ ,  $1/K_{HR}$ , and  $1/K_{MB}$  to increase by 3-fold, 5-fold, and 5-fold respectively, and  
528 allow  $g_{Hmax}$  and  $g_{Mmax}$  to increase by 20%. These bounds also ensure that evolved H and M can coexist  
529 for  $f_P < 0.5$ , and that Resource is on average not depleted by  $T$  to avoid cells entering stationary phase.  
530 Although maximal growth rate and nutrient affinity can sometimes show trade-off (e.g. Ref. [28]), for  
531 simplicity we assume here that they are independent of each other. We hold metabolite consumption  
532 ( $c_{RM}$ ,  $c_{BM}$ ,  $c_{RH}$ ) constant because conversion of essential elements such as carbon and nitrogen into  
533 biomass is unlikely to evolve quickly and dramatically, especially when these elements are not in large  
534 excess ([67]). Similarly, we hold the scaling factors  $\tilde{r}_P$  and  $\tilde{r}_B$  constant, assuming that they do not  
535 change rapidly during evolution due to stoichiometric constraints of biochemical reactions. We hold  
536 death rates ( $\delta_M$ ,  $\delta_H$ ) constant because they are much smaller than growth rates in general and thus any  
537 changes are likely inconsequential.

### 538 **3 Choosing growth parameter ranges so that we can fix growth** 539 **parameters to upper bounds**

540 Improving individual growth (maximal growth rate and affinity for metabolites) does not always lead  
541 to improved community function (Figure S11). However, we have chosen H and M growth parameters  
542 so that improving them from their ancestral values up to upper bounds generally improves community  
543 function (see below). When Newborn communities are assembled from "growth-adapted" H and M with  
544 maximal growth parameters, two advantages are apparent.

545 First, after fixing growth parameters of H and M to their upper bounds, we can identify a locally  
546 maximal community function. Specifically, for a Newborn with total biomass  $BM(0) = 100$  and fixed  
547 Resource  $R$ , we can calculate  $P(T)$  under various  $f_P$  and  $\phi_M(0)$ . Since both numbers range between  
548 0 and 1, we calculate  $P(T, f_P = 0.01 \times i, \phi_M(0) = 0.01 \times j)$  for integers  $i$  and  $j$  between 1 and 99.  
549 There is a single maximum for  $P(T)$  when  $i = 41$  and  $j = 54$ . In other words, if M invests  $f_P^* = 0.41$  of

550 its potential growth to make Product and if the fraction of M biomass in Newborn  $\phi_M^*(0) = 0.54$ , then  
 551 maximal community function  $P^*(T)$  is achieved (Figure 5A; magenta dashed line in Figure 6).

552 Second, growth-adapted H and M are evolutionarily stable in the sense that deviations (reductions)  
 553 from upper bounds will reduce both individual fitness and community function, and are therefore disfa-  
 554 vored by natural selection and community selection.

555 Below, we present evidence that within our parameter ranges (Table 1), improving growth parameters  
 556 generally improves community function. When  $f_P$  is optimal for community function ( $f_P^* = 0.41$ ), if we  
 557 fix four of the five growth parameters to their upper bounds, then as the remaining growth parameter  
 558 improves, community function increases (magenta lines in top panels of Figure S16). Moreover, mutants  
 559 with a reduced growth parameter are out-competed by their growth-adapted counterparts (magenta lines  
 560 in bottom panels of Figure S16).

561 When  $f_P = f_{P, Mono}^* = 0.13$  (optimal for M-monoculture function in Figure 5B; the starting genotype  
 562 for most community selection trials in this paper), community function and individual fitness generally  
 563 increase as growth parameters improve (black dashed lines in Figure S16). However, when M's affinity  
 564 for Resource ( $1/K_{MR}$ ) is reduced from upper bound, fitness improves (black dashed line in Panel J,  
 565 Figure S16). Mathematically speaking, this is a consequence of the Mankad-Bungay model [25] (Figure  
 566 S5B). Let  $R_M = R/K_{MR}$  and  $B_M = B/K_{MB}$ . Then,

$$\begin{aligned} \frac{\partial g_M}{\partial K_{MR}} &= \frac{\partial g}{\partial R_M} \frac{\partial R_M}{\partial K_{MR}} = \frac{\partial \left[ g_{max} \frac{R_M B_M}{R_M + B_M} \left( \frac{1}{1+R_M} + \frac{1}{1+B_M} \right) \right]}{\partial R_M} \frac{\partial R_M}{\partial K_{MR}} = g_{max} \frac{-R_M}{K_{MR}} \left[ \frac{B_M (R_M + B_M) - R_M B_M}{(R_M + B_M)^2} \right] \\ &= g_{max} \frac{R_M B_M}{(R_M + B_M) K_{MR}} \left( \frac{R_M}{(1 + R_M)^2} - \frac{B_M}{R_M + B_M} \left( \frac{1}{1 + R_M} + \frac{1}{1 + B_M} \right) \right) \end{aligned}$$

567 If  $R_M \ll 1 \ll B_M$  (corresponding to limiting R and abundant B),

$$\frac{R_M}{(1 + R_M)^2} - \frac{B_M}{R_M + B_M} \left( \frac{1}{1 + R_M} + \frac{1}{1 + B_M} \right) \approx \frac{R_M}{(1 + R_M)^2} - \frac{1}{1 + R_M} = -\frac{1}{(1 + R_M)^2} \quad (15)$$

568 and thus  $\frac{\partial g_M}{\partial K_{MR}} < 0$ . This is the familiar case where growth rate increases as the Monod constant  
 569 decreases (i.e. affinity increases). However, if  $B_M \ll 1 \ll R_M$

$$\frac{R_M}{(1 + R_M)^2} - \frac{B_M}{R_M + B_M} \left( \frac{1}{1 + R_M} + \frac{1}{1 + B_M} \right) \approx \frac{1}{R_M} - \frac{B_M}{R_M} \left( \frac{1}{1 + B_M} \right) = \frac{1}{R_M(1 + B_M)} \quad (16)$$

570 and thus  $\frac{\partial g_M}{\partial K_{MR}} > 0$ . In this case, growth rate decreases as the Monod constant decreases (i.e. affinity  
 571 increases). In other words, decreased affinity for the abundant nutrient improves growth rate. Transporter  
 572 competition for membrane space [68] could lead to this result, since reduced affinity for abundant nutrient  
 573 may increase affinity for rare nutrient. At all  $f_P$ , R is abundant and B is limiting at the beginning of each  
 574 cycle (Eq. 16), and therefore M cells with lower affinity for R will grow faster than those with higher  
 575 affinity (Figure S17). At the end of each cycle, the opposite is true (Figure S17). As  $f_P$  decreases, M  
 576 has higher growth capacity, and thus the first stage of B limitation lasts longer. Consequently, M can  
 577 gain higher overall fitness by lowering affinity for R (Figure S17A).

578 Regardless, decreased M affinity for Resource ( $1/K_{MR}$ ) only leads to a very slight increase in M  
 579 fitness (Figure S16J) and a very slight decrease in  $P(T)$  (Figure S17B). Moreover, this only occurs at  
 580 low  $f_P$  at the beginning of community selection, and thus may be neglected. Indeed, if we start all growth  
 581 parameters at their upper bounds and  $f_P = 0.13$ , and perform community selection while allowing all

582 parameters to vary (Figure S18), then  $1/K_{MR}$  decreases somewhat, yet the dynamics of  $f_P$  is similar to  
583 when we only allow  $f_P$  to change (compare Figure S18D with Figure 6A). Indeed, allowing both  $f_P$  and  
584  $1/K_{MR}$  to evolve does not change our conclusions as shown in Figure S19.

## 585 4 Mutation rate and the distribution of mutation effects

586 Literature values of mutation rate and the distribution of mutation effects are highly variable. Below, we  
587 briefly review the literature and discuss rationales of our choices.

588 Our “mutation rate” refers to the rate of mutations that either enhance a phenotype (“enhancing  
589 mutations”) or diminish a phenotype (“diminishing mutations”). Enhancing mutations of maximal growth  
590 rate ( $g_{Hmax}$  and  $g_{Mmax}$ ) and of nutrient affinity ( $1/K_{HR}$ ,  $1/K_{MR}$ ,  $1/K_{MB}$ ) enhance the fitness of an  
591 individual (“beneficial mutations”). In contrast, enhancing mutations in  $f_p$  diminish the fitness of an  
592 individual (“deleterious mutations”). Among mutations, a fraction will be neutral in that they do not  
593 affect the phenotype of interest. For example, the vast majority of synonymous mutations are neutral  
594 [69]. A larger fraction of neutral mutations is equivalent to a lower rate of phenotype-altering mutations.  
595 However, experimentally, the fraction of neutral mutations is difficult to determine. Consider fitness as  
596 the phenotype of interest. Whether a mutation is neutral or not can vary as a function of effective  
597 population size, and selection condition. For example, at low population size due to genetic drift (i.e.  
598 changes in allele frequencies due to chance), a beneficial or deleterious mutation may not be selected  
599 for or selected against, and is thus neutral with respect to selection [70, 71]. Mutations in an antibiotic-  
600 degrading gene can be neutral under low antibiotic concentrations, but deleterious under high antibiotic  
601 concentrations [72].

602 Depending on the phenotype, the rate of phenotype-altering mutations is highly variable. Although  
603 mutations that cause qualitative phenotypic changes (e.g. drug resistance) occur at a rate of  $10^{-8} \sim 10^{-6}$   
604 per genome per generation in bacteria and yeast [73, 74], mutations affecting quantitative traits such as  
605 growth rate occur much more frequently. For example in yeast, mutations that increase growth rate by  
606  $\geq 2\%$  occur at a rate of  $\sim 10^{-4}$  per genome per generation (calculated from Figure 3 of Ref. [75]), and  
607 mutations that reduce growth rate occur at a rate of  $10^{-4} \sim 10^{-3}$  per genome per generation [33, 76].  
608 Moreover, mutation rate can be elevated by as much as 100-fold in hyper-mutators where DNA repair  
609 is dysfunctional [77, 78, 76]. Here for a mutable phenotype, we assume a high, but biologically feasible,  
610 rate of  $2 \times 10^{-3}$  phenotype-altering mutations per cell per generation to speed up computation. At this  
611 rate, an average community would sample  $\sim 20$  new mutations per phenotype during maturation. We  
612 have also tried 100-fold lower mutation rate. As expected, evolutionary dynamics slows down, but all of  
613 our conclusions still hold (Figure S26).

614 Among phenotype-altering mutations, tens of percent create null mutants, as illustrated by experimen-  
615 tal studies on protein, viruses, and yeast [31, 32, 33]. Thus, we assume that 50% of phenotype-altering  
616 mutations are null (i.e. zero maximal growth rate, zero affinity for metabolite, or zero  $f_P$ ). Among non-  
617 null mutations, the relative abundances of enhancing versus diminishing mutations are highly variable in  
618 different experiments. It can be impacted by effective population size. For example, with a large effective  
619 population size, the survival rate of beneficial mutations is 1000-fold lower due to clonal interference  
620 (competition between beneficial mutations) [79]. The relative abundance of enhancing versus diminishing  
621 mutations also strongly depends on the starting phenotype [31, 72, 70]. For example with ampicillin as  
622 a substrate, the TEM-1  $\beta$ -lactamase acts as a “perfect” enzyme. Consequently, mutations were either  
623 neutral or diminishing, and few enhanced enzyme activity [72]. In contrast with a novel substrate such  
624 as cefotaxime, the enzyme had undetectable activity, and diminishing mutations were not detected while  
625 2% of tested mutations were enhancing [72]. When modeling H-M communities, we assume that the

626 ancestral H and M have intermediate phenotypes that can be enhanced or diminished.

627 We base our distribution of mutation effects on experimental studies where a large number of en-  
 628 hancing and diminishing mutants have been quantified in an unbiased fashion. An example is a study  
 629 from the Dunham lab where the fitness effects of thousands of *S. cerevisiae* mutations were quantified  
 630 under various nutrient limitations [34]. Specifically for each nutrient limitation, the authors first mea-  
 631 sured  $\Delta s_{WT} = (w_{WT} - \bar{w}_{WT})/\bar{w}_{WT} = w_{WT}/\bar{w}_{WT} - 1$ , the deviation in relative fitness of thousands of  
 632 bar-coded wild-type control strains from the wild-type mean fitness. Due to experimental noise,  $\Delta s_{WT}$   
 633 is distributed with zero mean and non-zero variance. Then, the authors measured thousands of  $\Delta s_{MT}$ ,  
 634 each corresponding to the relative fitness change of a bar-coded mutant strain with respect to the mean  
 635 of wild-type fitness (i.e.  $\Delta s_{MT} = (w_{MT} - \bar{w}_{WT})/\bar{w}_{WT}$ ). From these two distributions, we derive  $\mu_{\Delta s}$ , the  
 636 probability density function (PDF) of relative fitness change caused by mutations  $\Delta s = \Delta s_{MT} - \Delta s_{WT}$   
 637 (see Figure S8 for interpreting PDF), in the following manner.

638 First, we calculate  $\mu_m(\Delta s_{MT})$ , discrete PDF of mutant strain relative fitness change, with bin width  
 639 0.04. In other words,  $\mu_m(\Delta s_{MT}) = \text{counts in the bin of } [\Delta s_{MT} - 0.02, \Delta s_{MT} + 0.02] / \text{total counts}/0.04$   
 640 where  $\Delta s_{MT}$  ranges from  $-0.6$  and  $0.6$  which is sufficient to cover the range of experimental outcome.  
 641 The Poissonian uncertainty of  $\mu_m$  is  $\delta\mu_m(\Delta s_{MT}) = \sqrt{\text{counts per bin}/\text{total counts}/0.04}$ . Repeating this  
 642 process for wild-type collection, we obtain PDF of wild-type strain relative fitness  $\mu_w(\Delta s_{WT})$ . Next,  
 643 from  $\mu_w(\Delta s_{WT})$  and  $\mu_m(\Delta s_{MT})$ , we derive  $\mu_{\Delta s}(\Delta s)$ , the PDF of  $\Delta s$  with bin width 0.04:

$$\mu_{\Delta s}(\Delta s = i \times 0.04) = 0.04 \times \sum_{j=-\infty}^{+\infty} \mu_w(j \times 0.04) \mu_m((i + j) \times 0.04). \quad (17)$$

644 assuming that  $\Delta s_{MT}$  and  $\Delta s_{WT}$  are independent from each other. Here,  $i$  is an integer from  $-15$  to  $15$ .  
 645 The uncertainty for  $\mu_{\Delta s}$  is calculated by propagation of error. That is, if  $f$  is a function of  $x_i$  ( $i = 1, 2,$   
 646  $\dots, n$ ), then  $s_f$ , the error of  $f$ , is  $s_f^2 = \sum \left( \frac{\partial f}{\partial x_i} s_{x_i} \right)^2$  where  $s_{x_i}$  is the error or uncertainty of  $x_i$ . Thus,

$$\delta\mu_{\Delta s}(i) = 0.04 \times \sqrt{\sum_j \left[ (\delta\mu_w(j) \mu_m(i + j))^2 + (\mu_w(j) \delta\mu_m(i + j))^2 \right]} \quad (18)$$

647 where  $\mu_w(j)$  is short-hand notation for  $\mu_w(\Delta s_{WT} = j \times 0.04)$  and so on. Our calculated  $\mu_{\Delta s}(\Delta s)$  with  
 648 error bar of  $\delta\mu_{\Delta s}$  is shown in Figure S8.

649 Our reanalysis demonstrates that distributions of mutation fitness effects  $\mu_{\Delta s}(\Delta s)$  are largely con-  
 650 served regardless of nutrient conditions and mutation types (Figure S8B). In all cases, the relative fitness  
 651 changes caused by beneficial (fitness-enhancing) and deleterious (fitness-diminishing) mutations can be  
 652 approximated by separate exponential distributions with different means  $s_+$  and  $s_-$ , respectively. After  
 653 normalization to have a total probability of 1, we have:

$$\mu_{\Delta s}(\Delta s) = \begin{cases} \frac{1}{s_+ + s_- (1 - \exp(-1/s_-))} \exp(-\Delta s/s_+) & \text{if } \Delta s \geq 0 \\ \frac{1}{s_+ + s_- (1 - \exp(-1/s_-))} \exp(\Delta s/s_-) & \text{if } -1 < \Delta s < 0 \end{cases} \quad (19)$$

654 We fit the Dunham lab haploid data (since microbes are often haploid) to Eq. 19, using  $\mu_{\Delta s}(i)/\delta\mu_{\Delta s}(i)$   
 655 as the weight for non-linear least squared regression (green lines in Figure S8B). We obtain  $s_+ =$   
 656  $0.050 \pm 0.002$  and  $s_- = 0.067 \pm 0.003$ .

657 Interestingly, exponential distribution described the fitness effects of deleterious mutations in an RNA  
 658 virus significantly well [31]. Based on extreme value theory, the fitness effects of beneficial mutations  
 659 are predicted to follow an exponential distribution [80, 81], which has gained experimental support from  
 660 bacterium and virus [82, 83, 84] (although see [85, 75] for counter examples). Evolutionary models  
 661 based on exponential distributions of fitness effects have shown good agreements with experimental data  
 662 [79, 86].



663 We have also simulated smaller average mutational effects based on measurements of spontaneous  
 664 or chemically-induced (instead of deletion) mutations. For example, the fitness effects of nonlethal  
 665 deleterious mutations in *S. cerevisiae* were mostly 1%~5% [33], and the mean selection coefficient of  
 666 beneficial mutations in *E. coli* was 1%~2% [82, 79]. Thus, as an alternative, we choose  $s_+ = 0.02$ ;  $s_- =$   
 667  $-0.02$ , and obtain similar conclusions (Figure S27).

## 668 5 Modeling epistasis on $f_P$

669 Epistasis, where the effect of a new mutation depends on prior mutations (“genetic background”), is  
 670 known to affect evolutionary dynamics. Epistatic effects have been quantified in various ways. Experi-  
 671 ments on viruses, bacteria, yeast, and proteins have demonstrated that for two mutations that are both  
 672 deleterious or random, viable double mutants experience epistatic effects that are nearly symmetrically  
 673 distributed around a value near zero [87, 88, 89, 90, 91]. In other words, a significant fraction of mutation  
 674 pairs show no epistasis, and a small fraction show positive or negative epistasis (i.e. a double mutant  
 675 displays a stronger or weaker phenotype than expected from additive effects of the two single mutants).  
 676 Epistasis between two beneficial mutations can vary from being predominantly negative [88] to being  
 677 symmetrically distributed around zero [89]. Furthermore, a beneficial mutation tends to confer a lower  
 678 beneficial effect if the background already has high fitness (“diminishing returns”) [92, 89, 93].

679 A mathematical model by Wisner et al. incorporates diminishing returns epistasis [86]. In this model,  
 680 beneficial mutations of advantage  $s$  in the ancestral background are exponentially distributed with prob-  
 681 ability density  $\alpha \exp(-\alpha s)$ , where  $1/\alpha > 0$  is the mean advantage. After a mutation with advantage  $s$   
 682 has occurred, the mean advantage of the next mutation would be reduced to  $1/[\alpha(1+gs)]$ , where  $g > 0$   
 683 is the “diminishing returns parameter”. Wisner et al. estimates  $g \approx 6$ . This model quantitatively explains  
 684 the fitness dynamics of evolving *E. coli* populations.

685 Based on the above experimental and theoretical literature, we model epistasis on  $f_P$  in the following  
 686 manner. Let the relative mutation effect on  $f_P$  be  $\Delta f_P = (f_{P,mut} - f_P) / f_P$  (note  $\Delta f_P \geq -1$ ). Then,  
 687  $\mu(\Delta f_P, f_P)$ , the probability density function of  $\Delta f_P$  at the current  $f_P$  value, is described by a form  
 688 similar to Eq. 19:

$$\mu(\Delta f_P, f_P) = \begin{cases} \frac{1}{s_+(f_P)+s_-(f_P)(1-\exp(-1/s_-(f_P)))} \exp(-\Delta f_P/s_+(f_P)) & \text{if } \Delta f_P \geq 0 \\ \frac{1}{s_+(f_P)+s_-(f_P)(1-\exp(-1/s_-(f_P)))} \exp(\Delta f_P/s_-(f_P)) & \text{if } -1 < \Delta f_P < 0 \end{cases} \quad (20)$$

689 Here,  $s_+(f_P)$  and  $s_-(f_P)$  are respectively the mean  $\Delta f_P$  for enhancing and diminishing mutations  
 690 at current  $f_P$ . We assign  $s_+(f_P) = s_{+init}/(1 + g \times (f_P/f_{P,init} - 1))$ , where  $f_{P,init}$  is the  $f_P$  of the  
 691 initial background in a community selection trial (generally  $f_{P,init} = f_{P, Mono}^* = 0.13$ ),  $s_{+init}$  is the mean  
 692 enhancing  $\Delta f_P$  occurring in the initial background, and  $0 < g < 1$  is the epistatic factor. Similarly,  
 693  $s_-(f_P) = s_{-init} \times (1 + g \times (f_P/f_{P,init} - 1))$  is the mean  $|\Delta f_P|$  for diminishing mutations at current  
 694  $f_P$ . In the initial background since  $f_P = f_{P,init}$ , we have  $s_+(f_P) = s_{+init}$  and  $s_-(f_P) = s_{-init}$  where  
 695  $s_{+init} = 0.050$  and  $s_{-init} = 0.067$  (Figure S8). For subsequent mutations, consistent with the diminishing  
 696 returns principle, if current  $f_P > f_{P,init}$ , then a new enhancing mutation becomes less likely and its mean  
 697 effect also becomes smaller, while a new diminishing mutation becomes more likely and its mean effect  
 698 also becomes bigger (ensured by  $g > 0$ ; Figure S9 right panel). Similarly, if current  $f_P < f_{P,init}$ ,  
 699 then a new enhancing mutation becomes more likely and its mean effect also becomes bigger, while a  
 700 diminishing mutation becomes less likely and its mean effect also becomes smaller (ensured by  $0 < g < 1$ ;  
 701 Figure S9 left panel). In summary, our model captures not only diminishing returns epistasis, but also  
 702 our understanding of mutational effects on protein stability [70].

## 6 Simulation code of community selection

Our simulations track the biomass and phenotypes of individual cells as well as the amounts of Resource, Byproduct, and Product in each community throughout community selection. Deterministic processes include cell biomass growth, cell division, and changes in chemical concentrations. Stochastic processes include cell death, mutation, and the partitioning of cells of a selected Adult community into Newborn communities. Briefly, a cell starts at a biomass of 1. Once cell biomass grows to the division threshold of 2, the cell divides into two equal halves. Thus, our simulations track continuous biomass increase (Figure S3) as well as discrete cell division events, capturing experimental observations of *E. coli* growth [26]. Cell death occurs stochastically during each time interval with a probability dictated by the death rate. Immediately after cell division, each new cell mutates with a probability equal to the mutation rate. A mutation changes one of the mutable phenotypes, with a probability of 0.5 of generating a null mutant (maximal growth rate, or affinity for a metabolite, or  $f_P=0$ ) and a probability of 0.5 of increasing or decreasing the phenotype by a few percent (4). During community maturation, Resource  $R$ , Byproduct  $B$ , and Product  $P$  change due to consumption and release. After maturation time  $T$ , the Adult community with the highest function is chosen for reproduction where H and M cells are randomly distributed into Newborns of the next cycle. Simulation code is adjusted according to how community reproduction is implemented (e.g. pipetting or cell sorting). After the top-functioning Adult is depleted, the second top-functioning Adult is used until a total of  $n_{tot}$  Newborns are generated. We present details of the code below.

The code starts with a total of  $n_{tot} = 100$  Newborn communities with identical configuration:

- each community has 100 total cells of biomass 1. Thus, total biomass  $BM(0) = 100$ .
- 40 cells are H. 60 cells are M with identical  $f_P$ . Thus, M biomass  $M(0) = 60$  and fraction of M biomass  $\phi_M(0) = 0.6$ .

In our community selection simulations, unless otherwise stated, we do not model mutations arising during pre-growth prior to inoculating Newborns of the first cycle. For example, non-producing M cells can arise as a single M cell grows into a monoculture. If each Newborn community's 60 M cells are inoculated from a distinct population expanded from a single non-null M cell, then at least a fraction of Newborns will be free of null mutants (Figure S32). Adults matured from these Newborns will have high community functions and be chosen to reproduce. Thus, starting from the second cycle, community selection would be similar whether or not we consider mutants arising during pre-growth.

In the beginning, a random number is used to seed the random number generator for each Newborn community, and this number is saved so that the sequence of random numbers used below can be exactly repeated for data analysis. The initial amount of Resource is 1 unit of  $\tilde{R}(0)$ , the initial Byproduct is  $B(0) = 0$ . and the initial Product  $P(0) = 0$ . The cycle time is divided into time steps of  $\Delta\tau = 0.05$ .

Resource  $R(t)$  and Byproduct  $B(t)$  during time interval  $[\tau, \tau + \Delta\tau]$  are calculated by solving the following equations (similar to Eqs. 9-10) within  $[\tau, \tau + \Delta\tau]$  using the initial condition  $R(\tau)$  and  $B(\tau)$  via the ode23s solver in Matlab:

$$\frac{dR}{dt} = -c_{RM}g_M(R, B)M(\tau) - c_{RH}g_H(R)H(\tau) \quad (21)$$

$$\frac{dB}{dt} = g_H(R)H(\tau) - c_{BM}g_M(R, B)M(\tau) \quad (22)$$

where  $M(\tau)$  and  $H(\tau)$  are the biomass of M and H at time  $\tau$  (treated as constants during time interval  $[\tau, \tau + \Delta\tau]$ ), respectively. The solutions from Eq. 21 and 22 are used in the integrals below.

745 Suppose that H and M are rod-shaped organisms with a fixed diameter. Thus, the biomass of an H  
 746 cell at time  $\tau$  can be written as the length variable  $L_H(\tau)$ . The continuous growth of  $L_H$  during  $\tau$  and  
 747  $\tau + \Delta\tau$  can be described as

$$\frac{dL_H}{dt} = g_H(R)L_H$$

749 thus  $L_H(\tau + \Delta\tau)$  is

$$\ln \frac{L_H(\tau + \Delta\tau)}{L_H(\tau)} = \int_{\tau}^{\tau + \Delta\tau} g_H(R)dt$$

751 and

$$L_H(\tau + \Delta\tau) = L_H(\tau) \exp \left( \int_{\tau}^{\tau + \Delta\tau} g_H(R)dt \right). \quad (23)$$

753 Similarly, let the length of an M cell be  $L_M(\tau)$ . The continuous growth of M can be described as

$$\frac{dL_M}{dt} = (1 - f_P)g_M(R, B)L_M.$$

756 Thus for an M cell, its length  $L_M(\tau + \Delta\tau)$  is

$$L_M(\tau + \Delta\tau) = L_M(\tau) \exp \left( \int_{\tau}^{\tau + \Delta\tau} (1 - f_P)g_M(R, B)dt \right) \quad (24)$$

759 From Eq. 7 and 8, within  $\Delta\tau$ ,

$$\begin{aligned} \frac{dP}{dt} &= f_P g_M(R, B)M \\ &\sim \frac{f_P}{1 - f_P} \frac{dM}{dt} \end{aligned}$$

760 and we get

$$P(\tau + \Delta\tau) = P(\tau) + \frac{f_P}{1 - f_P} (M(\tau + \Delta\tau) - M(\tau))$$

762 where  $M(\tau + \Delta\tau) = \sum L_M(\tau + \Delta\tau)$  is the sum of the lengths of all M cells at  $\tau + \Delta\tau$ .

763 At the end of each  $\Delta\tau$ , each H and M cell has a probability of  $\delta_H \Delta\tau$  and  $\delta_M \Delta\tau$  to die, respectively.  
 764 This is simulated by assigning a random number between  $[0, 1]$  for each cell and those receive a random  
 765 number less than  $\delta_H \Delta\tau$  or  $\delta_M \Delta\tau$  get eliminated. For surviving cells, if a cell's length  $\geq 2$ , this cell will  
 766 divide into two cells with half the original length.

767 After division, each cell has a probability of  $P_{mut}$  to acquire a mutation that changes each of its  
 768 mutable phenotype (Methods, Section 4). As an example, let's consider mutations in  $f_P$ . If a mutation  
 769 occurs, then  $f_P$  will be multiplied by  $(1 + \Delta f_P)$ , where  $\Delta f_P$  is determined as below.

770 First, a uniform random number  $u_1$  between 0 and 1 is generated. If  $u_1 \leq 0.5$ ,  $\Delta f_P = -1$ , which  
 771 represents 50% chance of a null mutation ( $f_P = 0$ ). If  $0.5 < u_1 \leq 1$ ,  $\Delta f_P$  follows the distribution  
 772 defined by Eq. 20 with  $s_+(f_P) = 0.05$  for  $f_P$ -enhancing mutations and  $s_-(f_P) = 0.067$  for  $f_P$ -  
 773 diminishing mutations when epistasis is not considered (Methods, Section 4). In the simulation,  $\Delta f_P$

774 is generated via inverse transform sampling. Specifically,  $C(\Delta f_P)$ , the cumulative distribution function  
 775 (CDF) of  $\Delta f_P$ , can be found by integrating Eq. 19 from -1 to  $\Delta f_P$ :

$$\begin{aligned}
 C(\Delta f_P) &= \int_{-1}^{\Delta f_P} \mu_{\Delta s}(x) dx \\
 &= \begin{cases} \frac{s_-}{s_+ + s_- (1 - e^{-1/s_-})} (\exp(\Delta f_P/s_-) - \exp(-1/s_-)) & \text{if } \Delta f_P \leq 0 \\ 1 - \frac{s_+}{s_+ + s_- (1 - e^{-1/s_-})} \exp(-\Delta f_P/s_+) & \text{if } \Delta f_P \geq 0 \end{cases} \quad (25)
 \end{aligned}$$

776 The two parts of Eq. 25 overlap at  $C(\Delta f_P = 0) = s_- (1 - e^{-1/s_-}) / [s_+ + s_- (1 - e^{-1/s_-})]$ .

777 In order to generate  $\Delta f_P$  satisfying the distribution in Eq. 19, a uniform random number  $u_2$  between  
 778 0 and 1 is generated and we set  $C(\Delta f_P) = u_2$ . Inverting Eq. 25 yields

$$\Delta f_P = \begin{cases} s_- \ln \left( u_2 (s_+ + s_- (1 - e^{-1/s_-})) / s_- + e^{-1/s_-} \right) & u_2 \leq \frac{s_- (1 - e^{-1/s_-})}{s_+ + s_- (1 - e^{-1/s_-})} \\ -s_+ \ln \left( (1 - u_2) (s_+ + s_- (1 - e^{-1/s_-})) / s_+ \right) & u_2 > \frac{s_- (1 - e^{-1/s_-})}{s_+ + s_- (1 - e^{-1/s_-})} \end{cases} \quad (26)$$

780 When epistasis is considered,  $s_+(f_P) = s_{+init} / (1 + g \times (f_P/f_{P,init} - 1))$  and  $s_-(f_P) = s_{-init} \times$   
 781  $(1 + g \times (f_P/f_{P,init} - 1))$  are used in Eq. 26 to calculate  $\Delta f_P$  for each cell with different current  $f_P$   
 782 (Methods Section 5).  
 783

784 If a mutation increases or decreases the phenotypic parameter beyond its bound (Table 1), the  
 785 phenotypic parameter is set to the bound value.

786 The above growth/death/division/mutation cycle is repeated from time 0 to  $T$ . Note that since the  
 787 size of each M and H cell can be larger than 1, the integer numbers of M and H cells,  $I_M$  and  $I_H$ , are  
 788 generally smaller than biomass  $M$  and  $H$ , respectively. At the end of  $T$ , Adult communities are sorted  
 789 according to their  $P(T)$  values. The Adult community with the highest  $P(T)$  (or a randomly-chosen  
 790 Adult in control simulations) is selected for reproduction.

791 For community reproduction, we save the current random number generator state to be used to  
 792 generate random numbers for partitioning the Adult. We partition Adult into Newborns of  $\sim BM_{target}$   
 793 while allowing total biomass (total cell number) and  $\phi_M(0)$  to fluctuate, such as occurring during  
 794 pipetting. Specifically, the fold by which this Adult will be diluted is  $n_D = \lfloor (M(T) + H(T)) / BM_{target} \rfloor$   
 795 where  $BM_{target} = 100$  is the pre-set target for Newborn total biomass, and  $\lfloor x \rfloor$  is the floor function that  
 796 generates the largest integer that is smaller than  $x$ .  $I_H + I_M$  random integers between 1 and  $n_D$  are  
 797 uniformly generated so that each M and H cell is assigned a random integer between 1 and  $n_D$ . All  
 798 cells assigned with the same random integer belong to the same Newborn. This generates  $n_D$  newborn  
 799 communities. This partition regimen can be experimentally implemented by pipetting  $1/n_D$  volume of  
 800 an Adult community into a new well. If  $n_D$  is less than  $n_{tot}$  (the total number of communities under  
 801 selection), all  $n_D$  newborn communities are kept. Then, we partition the Adult with the next highest  
 802 function (or a random community in control simulations) to obtain an additional batch of  $n_D$  Newborns  
 803 until we obtain  $n_{tot}$  Newborns. The next cycle then begins.

804 To fix  $BM(0)$  to  $BM_{target}$  and  $\phi_M(0)$  to  $\phi_M(T)$  of the parent Adult, the code randomly picks M  
 805 cells from the selected Adult until the total biomass of M comes closest to  $BM_{target} \phi_M(T)$  without  
 806 exceeding it. H cells are sorted similarly. Because each M and H cells has a length between 1 and 2,  
 807 the biomass of M can vary between  $BM_{target} \phi_M(T) - 2$  and  $BM_{target} \phi_M(T)$  and the biomass of H can  
 808 vary between  $BM_{target} (1 - \phi_M(T)) - 2$  and  $BM_{target} (1 - \phi_M(T))$ . Variations in  $BM(0)$  and  $\phi_M(0)$  are  
 809 sufficiently small so that community selection improves  $\bar{f}_P(T)$  (Figure 6 G and H). We have also per-  
 810 formed simulations where the total number of cells is set to  $\lfloor BM_{target} / 1.5 \rfloor$  with  $\lfloor BM_{target} \phi_M(T) / 1.5 \rfloor$   
 811 M cells and  $\lfloor BM_{target} (1 - \phi_M(T)) / 1.5 \rfloor$  H cells where  $\phi_M(T) = I_M(T) / (I_M(T) + I_H(T))$  is calculated

812 from the numbers instead of biomass of M and H cells. We obtain the same conclusion (Figure S25,  
813 right panels).

814 To fix Newborn total biomass  $BM(0)$  to the target total biomass  $BM_{target}$  while allowing  $\phi_M(0)$   
815 to fluctuate (Figure 6 C and D), total biomass  $BM(0)$  is counted so that  $BM(0)$  comes closest to  
816  $BM_{target}$  without exceeding it (otherwise,  $P(T)$  may exceed the theoretical maximum). For example,  
817 suppose that a certain number of M and H cells have been sorted into a Newborn so that the total  
818 biomass is 98.6. If the next cell, either M or H, has a biomass of 1.3, this cell goes into the community  
819 so that the total biomass is  $98.6 + 1.3 = 99.9$ . However, if a cell of mass 1.6 happens to be picked, this  
820 cell doesn't go into this community so that this Newborn has a total biomass of 98.6 and the cell of  
821 mass 1.6 goes to the next Newborn. Thus, each Newborn may not have exactly the biomass of  $BM_{target}$   
822 , but rather between  $BM_{target} - 2$  and  $BM_{target}$ . Experimentally, total biomass can be determined from  
823 the optical density, or from the total fluorescence if cells are fluorescently labeled ([35]). To fix Newborn  
824 total cell number (instead of total biomass), the code sorts a total of  $\lfloor BM_{target}/1.5 \rfloor$  cells into each  
825 Newborn, assuming that the average biomass of an M or H cell is 1.5. We obtain the same conclusion,  
826 as shown in Figure S25.

827 To fix  $\phi_M(0)$  to  $\phi_M(T)$  of the selected Adult community from the previous cycle while allowing  
828  $BM(0)$  to fluctuate (Figure 6 E and F), the code first calculates dilution fold  $n_D$  in the same fashion  
829 as mentioned above.  $I_M(T)$  random integers between  $[1, n_D]$  are then generated for each M cell.  
830 All M cells assigned the same random integer belong to the same Newborn community. The code  
831 then randomly dispenses H cells into each Newborn until the total biomass of H comes closest to  
832  $M(0)(1 - \phi_M(T))/\phi_M(T)$  without exceeding it. Again, because each M and H has a biomass (or  
833 length) between 1 and 2,  $\phi_M(0)$  of each Newborn community may not be exactly  $\phi_M(T)$  of the selected  
834 Adult community. We have also performed simulations where the ratio of M and H cell numbers in  
835 the Newborn community,  $I_M(0)/I_H(0)$ , is set to  $I_M(T)/I_H(T)$  of the Adult community, and obtain the  
836 same conclusion (Figure S25 center panels).

## 837 7 Problems associated with alternative definitions of commu- 838 nity function and alternative means of reproducing an Adult

839  
840 We describe problems associated with two alternative definitions of community function. Let's consider  
841 a simpler case where groups of Manufacturers are selected for high  $P(T)$ , and cell death is negligible.  
842 We have

$$\frac{dM}{dt} = (1 - f_P)g_M M$$

$$\frac{dP}{dt} = f_P g_M M$$

845 where biomass growth rate  $g_M$  is a function of  $B$  and  $R$ . Thus,

$$\frac{dM}{(1 - f_P)dt} = \frac{dP}{f_P dt}$$

846 and we have

$$P(T) = \frac{f_P}{1 - f_P} (M(T) - M(0)) \approx \frac{f_P}{1 - f_P} M(T)$$

847 if  $M(T) \gg M(0)$  (true if  $T$  is long enough for cells to double at least three or four times).

848 If we define community function as  $P(T)/M(T) \approx \frac{f_P}{1-f_P}$  (total Product normalized against  $M$   
849 biomass in Adult community), then higher  $\frac{f_P}{1-f_P}$  or higher  $f_P$  always leads to higher community function.  
850 Higher  $f_P$  in turn leads to  $M$  extinction (Figure 1).

851 If the community function is instead defined as  $P(T)/M(0)$ , then

$$\frac{P(T)}{M(0)} \approx \frac{f_P}{1-f_P} \frac{M(T)}{M(0)} = \frac{f_P}{1-f_P} \exp\left((1-f_P) \int_T g_M dt\right) \quad (27)$$

852 From Eq. 27, at a fixed  $f_P$ ,  $\frac{P(T)}{M(0)}$  increases as  $\int_T g_M dt$  increases.  $\int_T g_M dt$  increases as  $\phi_M(0)$  decreases,  
853 since the larger fraction of Helper, the faster the accumulation of Byproduct and the larger  $\int_T g_M dt$   
854 (Figure S24B). Thus, we end up selecting communities with small  $\phi_M(0)$  (Figure S6). This means that  
855 Manufactures could get lost during community reproduction, and community selection then fails.

856 If Resource is unlimited, then it will be problematic to reproduce an Adult by diluting it by a fixed-  
857 fold to Newborns. This is because with unlimited Resource, there is no competition between H and M.  
858 According to Eq. 27,  $P(T)$  increases linearly with  $M(0)$ .  $P(T)$  also increases with  $H(0)$ , since higher  
859  $H(0)$  leads to higher Byproduct and consequently higher  $\int_T g_M dt$  in the exponent. Thus each cycle,  
860 communities with larger  $BM(0)$  (instead of higher  $f_P$ ) will get selected.

## 861 **8 $f_P^*$ is smaller for M group than for H-M community**

862 For groups or communities with a certain  $\int_T g_M dt$ , we can calculate  $f_P$  optimal for community function  
863 from Eq. 27 by setting

$$\frac{dP(T)}{df_P} = M(0) \frac{d}{df_P} \left[ \frac{f_P}{1-f_P} \exp\left((1-f_P) \int_T g_M dt\right) \right] = 0$$

864 We have

$$\frac{1}{(1-f_P)^2} \exp\left((1-f_P) \int_T g_M dt\right) - \frac{f_P}{1-f_P} \int_T g_M dt \exp\left((1-f_P) \int_T g_M dt\right) = 0$$

865 or

$$1 / \int_T g_M dt = f_P(1-f_P).$$

866 If  $\int_T g_M dt \gg 1$ ,  $f_P$  is very small, then the optimal  $f_P$  for  $P(T)$  is

$$f_P^* \approx \left( \int_T g_M dt \right)^{-1} \quad (28)$$

867 M grows faster in monoculture than in community because B is supplied in excess in monoculture while  
868 in community, H-supplied Byproduct is initially limiting. Thus,  $\int_T g_M dt$  is larger in monoculture than in  
869 community. According to Eq. 28,  $f_P^* = 1 / \int_T g_M dt$  is smaller for monoculture than for community.

## 870 **9 Stochastic fluctuations during community reproduction**

871  $BM(0)$  fluctuates in a Poissonian fashion with a standard deviation of  $\sqrt{E[BM(0)]}$ , where “E” means  
872 the expected value.

$M(0)$  and  $H(0)$  fluctuate independently with a standard deviation of  $\sqrt{E[M(0)]} = \sqrt{BM_{target}\phi_M(T)}$  and  $\sqrt{E[H(0)]} = \sqrt{BM_{target}(1 - \phi_M(T))}$ , respectively. Therefore,  $M(0)/H(0)$  fluctuates with a variance of

$$\begin{aligned}\text{Var}[M(0)/H(0)] &= \left(\frac{E[M(0)]}{E[H(0)]}\right)^2 \left[ \frac{\text{Var}[M(0)]}{(E[M(0)])^2} - 2\frac{\text{Cov}[M(0), H(0)]}{E[M(0)]E[H(0)]} + \frac{\text{Var}[H(0)]}{(E[H(0)])^2} \right] \\ &= \left(\frac{\phi_M(T)}{(1 - \phi_M(T))}\right)^2 \left[ \frac{1}{BM_{target}\phi_M(T)} + \frac{1}{BM_{target}(1 - \phi_M(T))} \right]\end{aligned}$$

873 where “Cov” means covariance and “Var” means variance, and  $\phi_M(T)$  is the fraction of M biomass in  
874 the Adult community from which Newborns are generated.

## 875 10 Mutualistic H-M community

876 In the mutualistic H-M community, Byproduct inhibits the growth of H. According to [94], the growth  
877 rate of *E. coli* decreases exponentially as the exogenously added acetate concentration increases. Thus,  
878 we only need to modify the growth of H by a factor of  $\exp(-B/B_0)$  where  $B$  is the concentration of  
879 Byproduct and  $B_0$  is the concentration of Byproduct at which H's growth rate is reduced by  $e^{-1} \sim 0.37$ :

$$\frac{dH}{dt} = \exp\left(-\frac{B}{B_0}\right) \frac{g_{Hmax}R}{R + K_{HR}} H - \delta_H H$$

880 The larger  $B_0$ , the less inhibitory effect Byproduct has on H and when  $B_0 \rightarrow +\infty$  Byproduct does not  
881 inhibit the growth of H. For simulations in Figure S30,  $B_0 = 2K_{MB}$ .

## 882 Acknowledgment

883 We thank the following for discussions: Lin Chao (UCSD), Maitreya Dunham (UW Seattle), Corina  
884 Tarnita (Princeton), Harmit Malik (Fred Hutch), and Alvaro Sanchez (Yale). Some of these discussions  
885 took place at the 2017 “Systems Biology and Molecular Economy of Microbial Communities” workshop  
886 at the International Centre for Theoretical Physics, Trieste, Italy and at the 2018 “Physical Principles  
887 Governing the Organization of Microbial Communities” workshop at the Aspen Center for Physics,  
888 Colorado, USA. We thank Alex Yuan, Chichun Chen, Bill Hazelton, Samuel Hart, David Skelding, Doug  
889 Jackson, and Kirill Korolev for feedback on the manuscript. This research was supported by the High  
890 Performance Computing Shared Resource of the Fred Hutch (P30 CA015704).

## Supplementary Figures

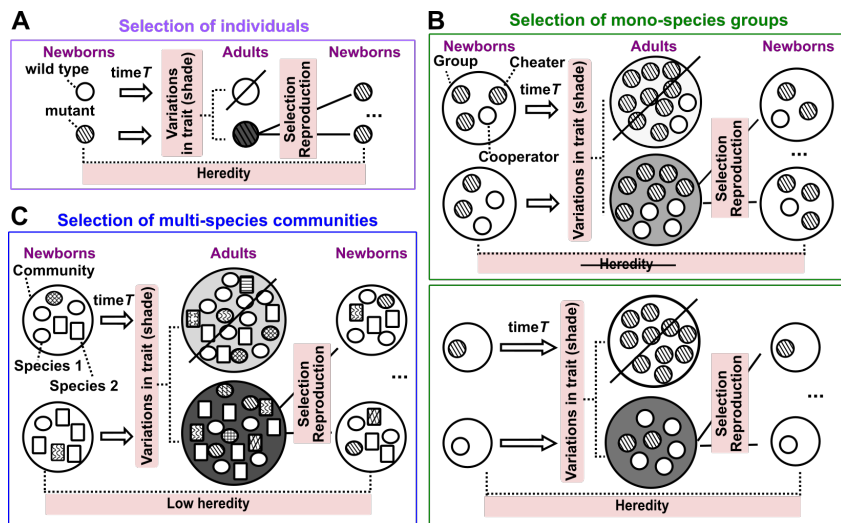

**Figure S1: Artificial selection is more challenging for multi-species communities than for individuals or mono-species groups.** Artificial selection can be applied to any population of entities [95]. An entity can be an individual (**A**), a mono-species group (**B**), or a multi-species community (**C**). Unlike natural selection which selects for fastest-growing cells, artificial selection generally selects for traits that are costly to individuals. In each selection cycle, a population of “Newborn” entities grow for maturation time  $T$  to become “Adults”. Adults expressing a higher level of the trait of interest (darker shade) are selected to reproduce. An individual reproduces by making copies of itself, while an Adult group or community can reproduce by randomly splitting into multiple Newborns of the next selection cycle. Successful artificial selection requires that i) entities display trait variations; ii) trait variations can be selected to result in differential entity survival and reproduction; and iii) entity trait is sufficiently heritable from one selection cycle to the next [96]. In all three types of selection, entity variations can be introduced by mutations and recombinations in individuals. However, heredity can be low in community selection. (**A**) Artificial selection of individuals has been successful [97, 98, 99], since a trait is largely heritable so long as mutation and recombination are sufficiently rare. (**B, C**) In group and community selection, if  $T$  is small so that newly-arising genotypes cannot rise to high frequencies within a selection cycle, then Adult trait is mostly determined by Newborn *composition* (the biomass of each genotype in each member species). Then, *variation* can be defined as the dissimilarity in Newborn composition within a selection cycle, and *heredity* as the similarity of Newborn composition from one cycle to the next for Newborns connected through lineage (tubes with red outlines in Figure 3). (**B**) Artificial selection of mono-species groups has been successful [43, 45, 13]. Suppose cooperators but not cheaters pay a fitness cost to generate a product (shade). Artificial selection for groups producing high total product favors cooperator-dominated groups, although within a group, cheaters grow faster than cooperators. At a large Newborn population size (**top**), all Newborns will harbor similar fractions of cheaters, and thus inter-group variation will be small. During maturation, cheater frequency will increase, thereby diminishing heredity. In contrast, when Newborn groups are initiated at a small size such as one individual (**bottom**), a Newborn group will comprise either a cooperator or a cheater, thereby ensuring variation. Furthermore, even if cheaters were to arise during maturation, a fraction of Newborns of the next cycle will by chance inherit a cooperator, thereby ensuring some level of heredity. Thus, group selection can work when Newborn size is small. (**C**) Artificial selection of multi-species communities may be hindered by insufficient heredity. During maturation, the relative abundance of genotypes and species can rapidly change due to ecological interactions and evolution, which compromises heredity. During community reproduction, stochastic fluctuations in Newborn composition further reduce heredity.



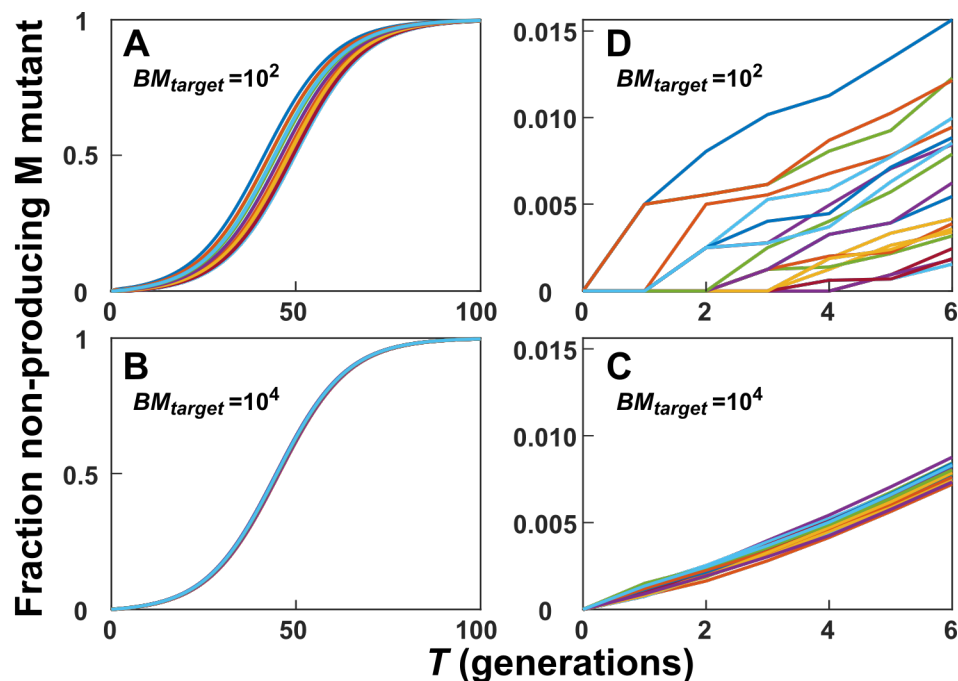

Figure S2: **Large Newborn size or long maturation time allows non-producers to accumulate and reduces inter-community variation.** From target total biomass of  $10^2$  or  $10^4$  wild-type cells, M population expands and mutates during a maturation time  $T$  that lasts 100 or 6 generations. Immediately following cell division, wild-type daughter cells mutate to non-producers with a probability of  $10^{-3}$ . Wild-type and mutant cells follow exponential growth. The growth rate of wild-type cells is 0.87 that of mutants. The fraction of biomass made up by mutants at each wild-type doubling is shown. Note different scales. At  $10^2$  total biomass, a small fraction mutation (e.g. 0.005) means that some communities will remain free of non-producers at the end of  $T$ .

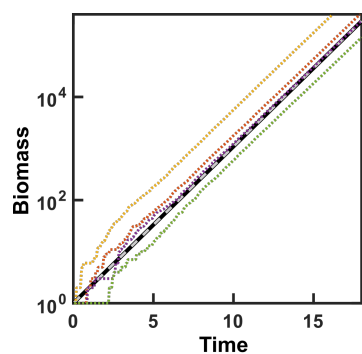

Figure S3: **A comparison of different growth models.** We model exponential biomass growth in excess metabolites. Thick black line: analytical solution with biomass growth rate (0.7/time unit). Grey dashed line: simulation assuming that biomass increases exponentially at 0.7/time unit and that cell division occurs upon reaching a biomass threshold, an assumption used in our model. Color dotted lines: simulations assuming that cell birth occurs at a probability equal to the birth rate multiplied with the length of simulation time step ( $\Delta\tau = 0.05$  time unit). When a cell birth occurs, biomass increases discretely by 1, resulting in step-wise increase in color dotted lines at early time.

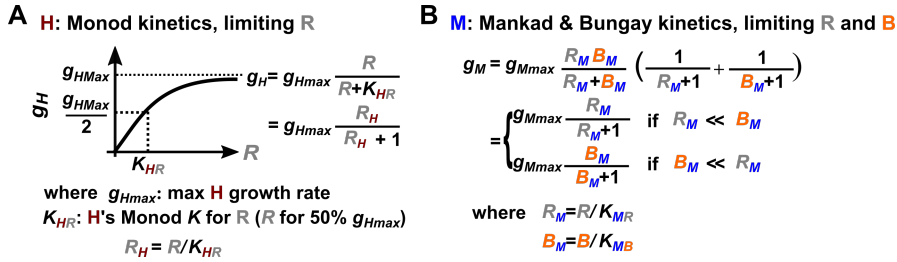

Figure S4: **Growth models of H and M.** (A) H growth follows Monod kinetics, reaching half maximal growth rate when  $R = K_{HR}$ . (B) M growth follows dual-substrate Mankad and Bungay kinetics. When Resource R is in great excess ( $R_M \gg B_M$ ) or Byproduct B is in great excess ( $B_M \gg R_M$ ), we recover mono-substrate Monod kinetics (A).

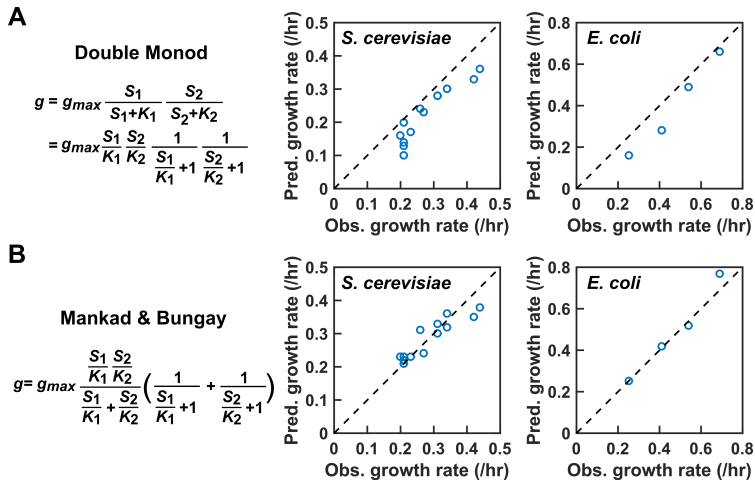

Figure S5: **A comparison of dual-substrate models.** Suppose that cell growth rate depends on each of the two substrates  $S_1$  and  $S_2$  in a Monod-like, saturable fashion. When  $S_2$  is in excess, the  $S_1$  at which half maximal growth rate is achieved is  $K_1$ . When  $S_1$  is in excess, the  $S_2$  at which half maximal growth rate is achieved is  $K_2$ . (A) In the “Double Monod” model, growth rate depends on the two limiting substrates in a multiplicative fashion. In the model proposed by Mankad and Bungay (B), growth rate takes a different form. In both models, when one substrate is in excess, growth rate depends on the other substrate in a Monod-fashion. However, when  $\frac{S_1}{K_1} = \frac{S_2}{K_2} = 1$ , the growth rate is predicted to be  $g_{max}/2$  by Mankad & Bungay model, and  $g_{max}/4$  by the Double Monod model. Mankad and Bungay model outperforms the Double Monod model in describing experimental data of *S. cerevisiae* and *E. coli* growing on low glucose and low nitrogen. The figures are plotted using data from Ref. [25].

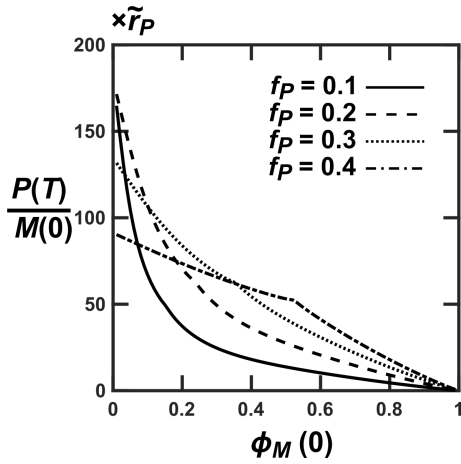

Figure S6: **Problems of defining community function as  $P(T)/M(0)$ .** Over the range of  $f_P$  where M and H can coexist,  $P(T)/M(0)$  increases as  $\phi_M(0)$  decreases. Thus, M can go extinct.

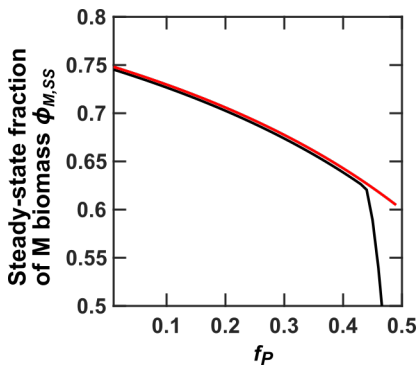

Figure S7: Comparison between the steady-state  $\phi_{M,SS}$  calculated from Eqs. 6-10 (black curve) and from Eq. 14 (red line).

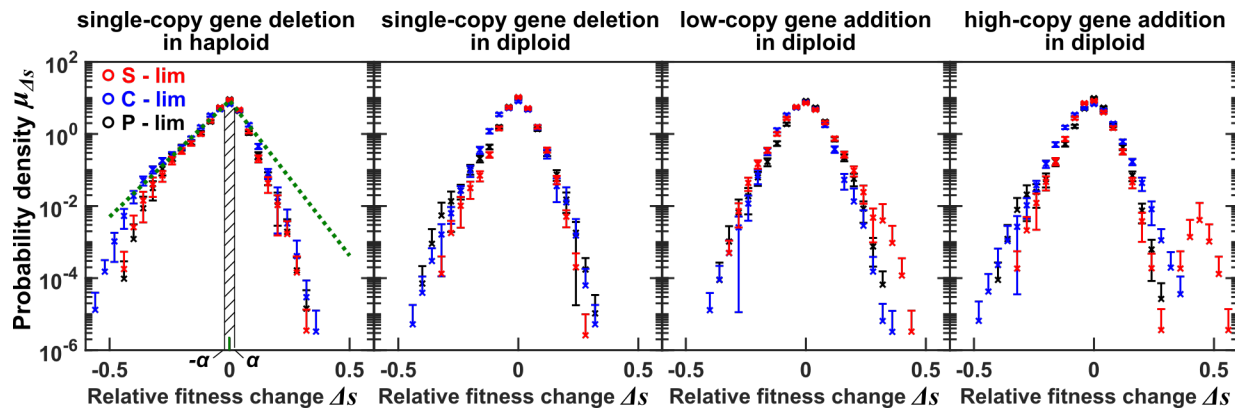

Figure S8: **Probability density functions of changes in relative fitness due to mutations** ( $\mu_{\Delta s}(\Delta s)$ ). We derived  $\mu_{\Delta s}(\Delta s)$  from the Dunham lab data [34] where bar-coded mutant strains were competed under sulfate-limitation (red), carbon-limitation (blue), or phosphate-limitation (black). Error bars represent uncertainty  $\delta\mu_{\Delta s}$  (the lower error bar is omitted if the lower estimate is negative). In the leftmost panel, green lines show non-linear least squared fitting of data to Eq. 19 using all three sets of data. Note that data with larger uncertainty are given less weight, and thus deviate more from the fitting lines. For an exponentially-distributed probability density function  $p(x) = \exp(-x/r)/r$  where  $x, r > 0$ , the average of  $x$  is  $r$ . When plotted on a semi-log scale, we get a straight line with slope  $1/r$ , and inverting this gets us the average effect  $r$ . From the green line on the right side, we obtain the average effect of enhancing mutations  $s_+ = 0.050 \pm 0.002$ , and from the green line on the left side, we obtain the average effect of diminishing mutations  $s_- = 0.067 \pm 0.003$ . The probability of a mutation altering a phenotype by  $\pm\alpha$  is the shaded area.

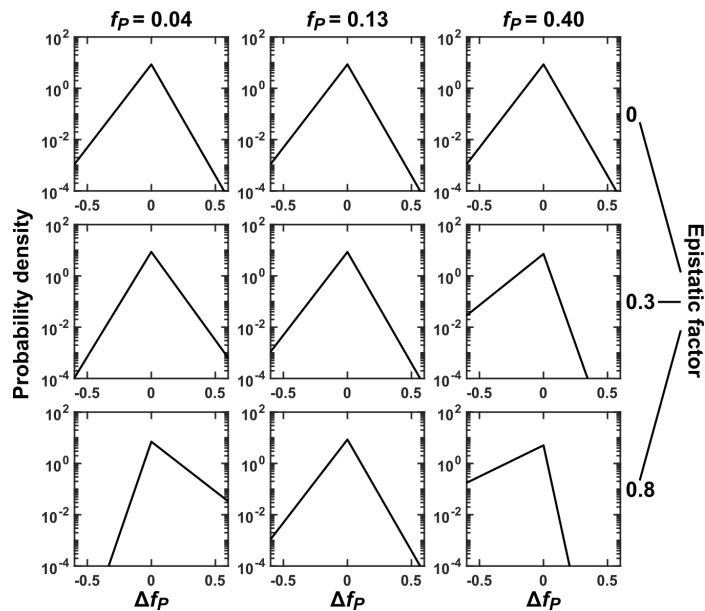

Figure S9: **Mutation effects under epistasis.** Distribution of mutation effects at different current  $f_P$  values (marked on top) are plotted. (Top) When there is no epistasis, distribution of mutational effects on  $f_P$  ( $\Delta f_P$ ) are identical regardless of current  $f_P$ . (Middle and Bottom) With epistasis (see Methods Section 5 for definition of epistasis factor), mutational effects on  $f_P$  depend on the current value of  $f_P$ . If current  $f_P$  is low (left), enhancing mutations are more likely to occur (the area to the right of  $\Delta f_P = 0$  becomes bigger) and their mean mutational effect becomes larger (mean= $1/\text{slope}$  becomes larger due to smaller slope), while diminishing mutations are less likely to occur and their mean mutational effect is smaller. If current  $f_P$  is high (right), the opposite is true.

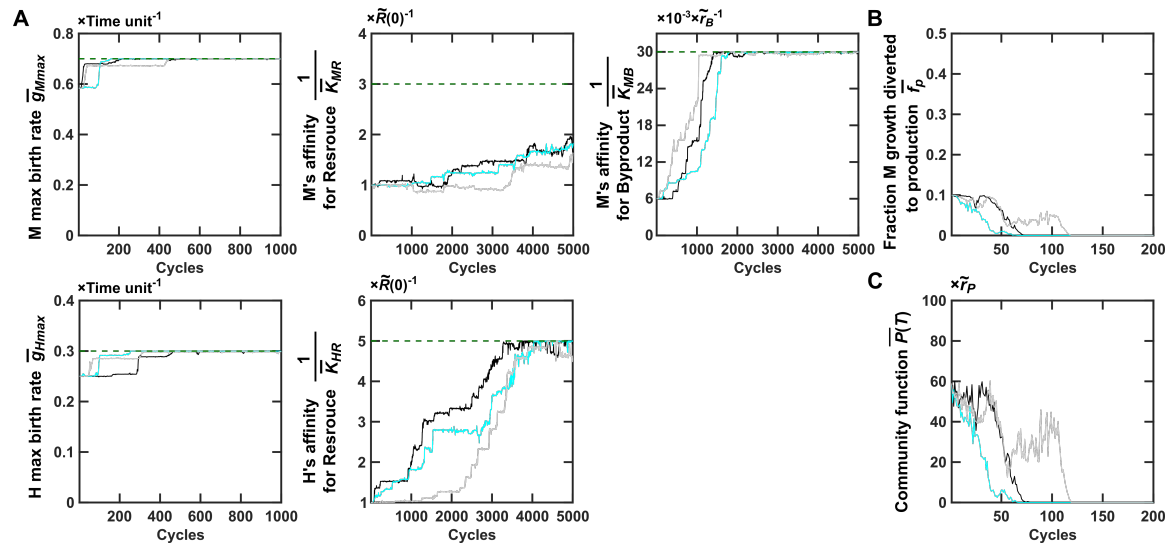

Figure S10: **Community function declines to zero in the absence of community selection.** Without community selection, natural selection favors fast growers with improved maximal growth rates and improved affinities for nutrients (A), and zero  $f_P$  (B). Consequently,  $P(T)$  decreases to zero (C). Maximal growth rates of H and M ( $\bar{g}_{Hmax}$  and  $\bar{g}_{Mmax}$ ), H's affinity for Resource  $1/\bar{K}_{HR}$ , and M's affinity for Byproduct  $1/\bar{K}_{MB}$  rapidly improve to their respective upper bounds, while M's affinity for Resource  $1/\bar{K}_{MR}$  improves more slowly. This is consistent with M's growth being more limited by Byproduct. Green dashed lines: upper bounds of phenotypes; Magenta dashed lines:  $f_P$  optimal for community function and maximal  $P(T)$  when all five growth parameters are fixed at their upper bounds and  $\phi_M(0)$  is also optimal for  $P(T)$ . Black, cyan, and gray curves show three independent simulations.  $\bar{P}(T)$  is averaged across selected Adults.  $\bar{g}_{Mmax}$ ,  $\bar{g}_{Hmax}$ , and  $\bar{f}_P$  are obtained by averaging within each selected Adult and then averaging across selected Adults.  $\bar{K}_{SpeciesMetabolite}$  are averaged within each selected Adult, then averaged across selected Adults, and finally inverted to represent average affinity. Note different  $x$  axis scales.

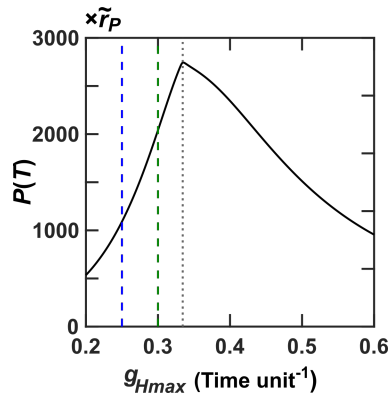

Figure S11: **Improving Helper  $g_{Hmax}$  does not necessarily improve community function.** We have chosen the ancestral (blue dashed line) and the biological upper bound (green dashed line) of  $g_{Hmax}$  such that improving  $g_{Hmax}$  improves community function. But suppose we have chosen ancestral  $g_{Hmax}$  at the grey dotted line, then higher  $g_{Hmax}$  would lower community function. The black solid curve is obtained by numerically integrating Eqs. 6-10 at different  $g_{Hmax}$  values where  $f_P$  is set to 0.4 and all growth parameters except for  $g_{Hmax}$  are set to their respective upper bounds.  $BM(0)$  is 100, and  $\phi_M(0)$  is 0.7 (close to steady-state value).

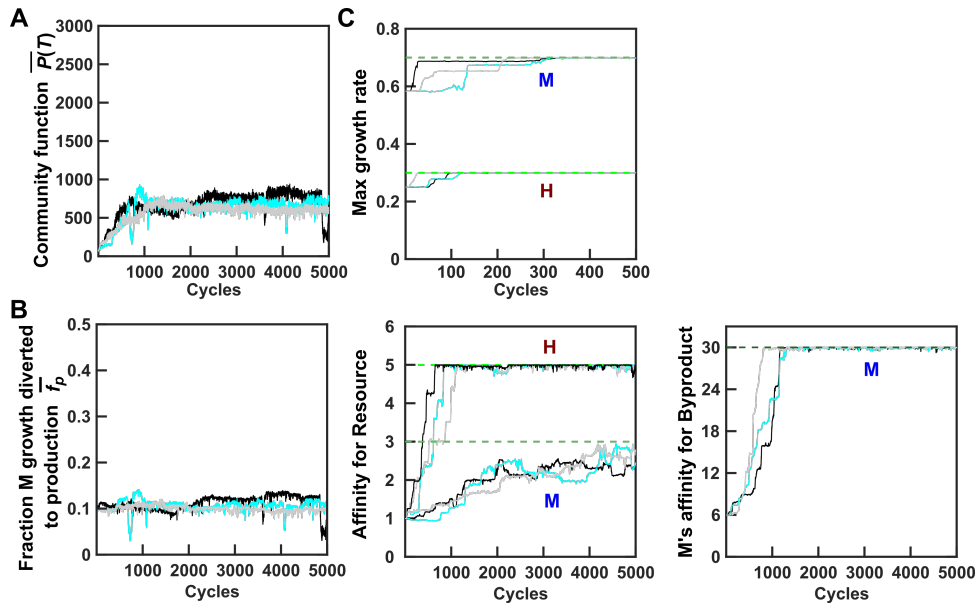

Figure S12: **Improved individual growth can promote community function.** Community function  $P(T)$  increases upon community selection (A). Since  $f_P$  remains unchanged (B), this increase in  $P(T)$  must be due to improved individual growth (C). Black, cyan, and gray curves show three independent simulation trials. Green dashed lines: upper bounds of the five growth parameters. The maximal growth rates ( $\bar{g}_{Mmax}$  and  $\bar{g}_{Hmax}$ ) have the unit of 1/time. Affinity for Resource ( $1/K_{MR}$ ,  $1/K_{HR}$ ) has the unit of  $1/\bar{R}(0)$ , where  $\bar{R}(0)$  is the initial amount of Resource in Newborn. Affinity for Byproduct ( $1/K_{MB}$ ) has the unit of  $1/\tilde{r}_B$ , where  $\tilde{r}_B$  is the amount of Byproduct released per H biomass produced. Product P has the unit of  $\tilde{r}_P$ , the amount of Product released at the cost of one M biomass. More details can be found in Table 1.  $\bar{P}(T)$  is averaged across selected Adults.  $\bar{g}_{Mmax}$ ,  $\bar{g}_{Hmax}$ , and  $\bar{f}_P$  are obtained by averaging within each selected Adult and then averaging across selected Adults.  $\bar{K}_{SpeciesMetabolite}$  are averaged within each selected Adult, then averaged across selected Adults, and finally inverted to represent average affinity.

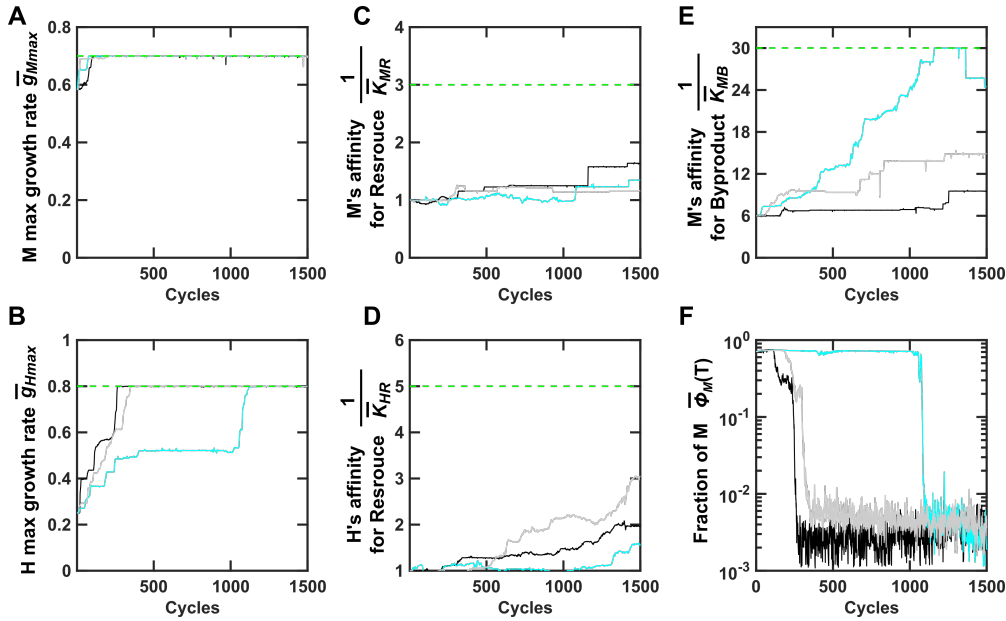

Figure S13: **Improving individual growth can impair community function.** (A-E) During community selection, growth parameters improved. Since the upper bound for  $\bar{g}_{Hmax}$  ( $\bar{g}_{Hmax}^* = 0.8$ ) is larger than that of  $\bar{g}_{Mmax}$  ( $\bar{g}_{Mmax}^* = 0.7$ ), natural selection eventually improved  $\bar{g}_{Hmax} > \bar{g}_{Mmax}$ . This would ordinarily lead to extinction of M. However, community selection managed to maintain M at a very low level (F). Black, cyan, and gray curves show three independent simulation trials. Green dashed lines: upper bounds of the five growth parameters. The maximal growth rates ( $\bar{g}_{Mmax}$  and  $\bar{g}_{Hmax}$ ) have the unit of 1/time. Affinity for Resource ( $1/\bar{K}_{MR}$ ,  $1/\bar{K}_{HR}$ ) has the unit of  $1/\bar{R}(0)$ , where  $\bar{R}(0)$  is the initial amount of Resource in Newborn. Affinity for Byproduct ( $1/\bar{K}_{MB}$ ) has the unit of  $10^{-3}/\bar{r}_B$ , where  $\bar{r}_B$  is the amount of Byproduct released per H biomass produced. Product P has the unit of  $\bar{r}_P$ , the amount of Product released at the cost of one M biomass.  $\bar{P}(T)$  is averaged across selected Adults.  $\bar{g}_{Mmax}$ ,  $\bar{g}_{Hmax}$ , and  $\bar{f}_P$  are obtained by averaging within each selected Adult and then averaging across selected Adults.  $\bar{K}_{SpeciesMetabolite}$  are averaged within each selected Adult, then averaged across selected Adults, and finally inverted to represent average affinity.



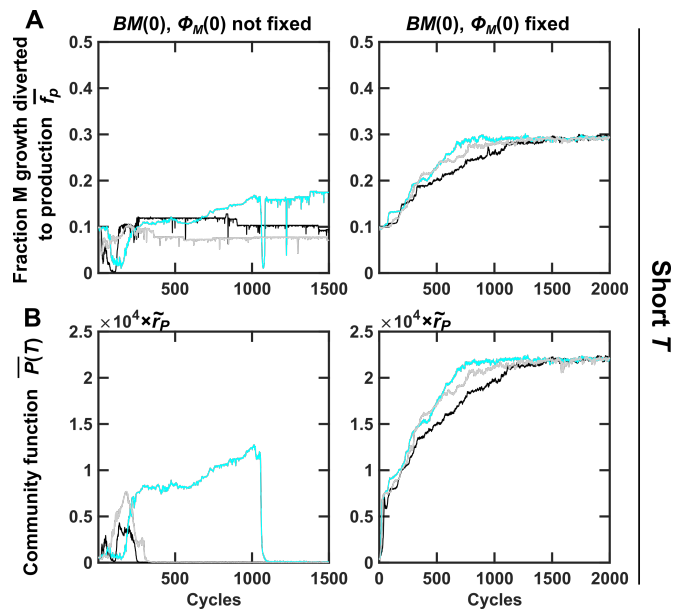

Figure S14: **Reducing non-heritable variations improves community function even when improved growth parameters impair community function.** Similar to Figure S13, the upper bound for  $g_{Hmax}$  ( $g_{Hmax}^* = 0.8$ ) is larger than that of  $g_{Mmax}$  ( $g_{Mmax}^* = 0.7$ ). When both  $BM(0)$  and  $\phi_M(0)$  were allowed to fluctuate stochastically, community function declined to very low levels due to low abundance of M (Figure S13F). Note that M did not go extinct because communities without any M would not be chosen to reproduce. When both  $BM(0)$  and  $\phi_M(0)$  were fixed, both  $\bar{f}_P$  and  $\bar{P}(T)$  improved over cycles. Here, Resource supplied to Newborn communities could support  $10^5$  total biomass to accommodate faster growth rate.

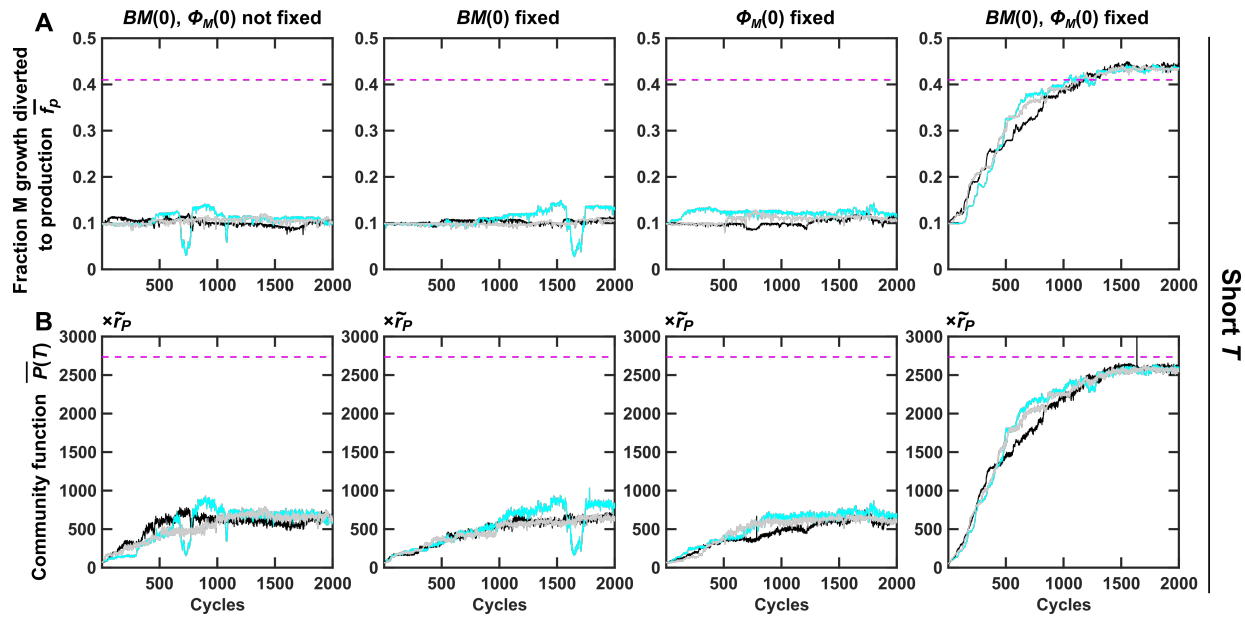

Figure S15: **Community selection succeeds when controlling the right experimental variables even if growth parameters are allowed to be modified by mutations.** Dynamics of (A)  $\bar{f}_P(T)$  and (B)  $\bar{P}(T)$  of selected communities when the maturation time  $T = 17$ ,  $g_{Hmax}^* = 0.3$  and  $g_{Mmax}^* = 0.7$ . All other simulation parameters are in Table 1. Compared to simulations whose results are presented in Figure 6, simulations for this figure allowed growth parameters of each M and H cells, and  $f_P$  of each M cell, to vary. The legends are the same as Figure 6.

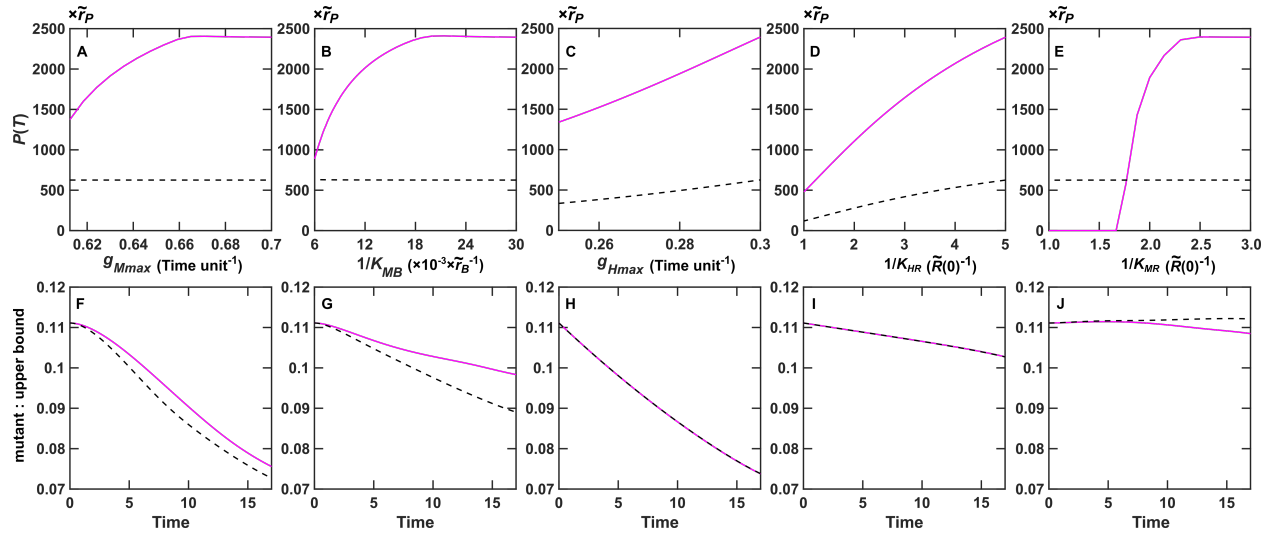

**Figure S16: Improving maximal growth rates and nutrient affinities generally, but do not always, improve individual fitness and community function.** In all figures, solid and dashed lines respectively represent dynamics when  $f_P = f_P^* = 0.41$  (optimal for community function if all growth parameters are fixed at their upper bounds and  $\phi_M(0) = 0.54$ ; Figure 5A) and  $f_P = f_{P, Mono}^* = 0.13$  (optimal for M monoculture production when Byproduct is in excess; Figure 5B). (A-D) Community function increases as the indicated growth parameter increases (while all other growth parameters are fixed at upper bounds). For example, In (A), all growth parameters except for  $g_{Mmax}$  are at their upper bounds. For each  $g_{Mmax}$ , the steady-state  $\phi_{M,SS}$  is calculated using equations in Methods Section 1. This steady-state  $\phi_{M,SS}$  is then used to calculate  $P(T)$ . (F-I) respectively show that mutant individuals with the indicated growth parameter 10% lower than the upper bound have lower fitness. For example in (F), a Newborn community has 70 M and 30 H. 90% of M have upper bound  $g_{Mmax} = 0.7$  (“upper bound”). 10% of M have  $g_{Mmax} = 0.63$ , 10% less than the upper bound (“mutant”). Other growth parameters are all at upper bounds. The ratio between mutant and upper bound drops over maturation time, indicating that M cells with mutant (lower) maximal growth rate have lower fitness. (E, J) When  $f_P = 0.13$  (black dashed line) but not when  $f_P = 0.41$  (magenta line), increasing M’s affinity for Resource ( $1/K_{MR}$ ) slightly decreases individual fitness, but this has only a slight effect on  $P(T)$ .

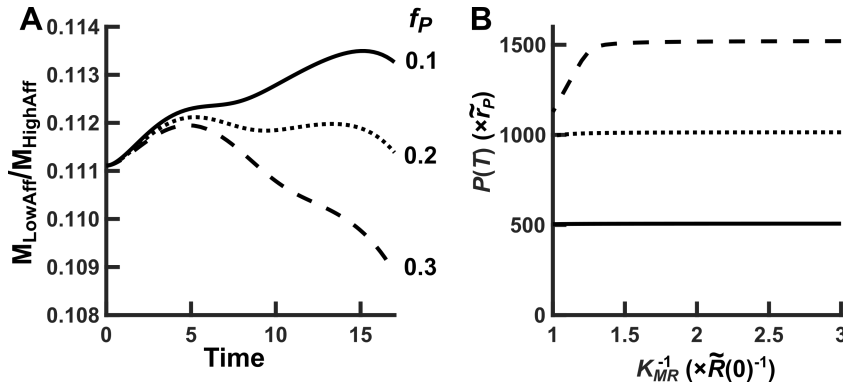

Figure S17: **At low  $f_P$ , M's lower affinity for Resource can increase its growth rate.** (A) The ratio between  $M_{LowAff}$  with low affinity for R ( $K_{MR}^{-1} = 2.5\tilde{R}(0)^{-1}$ ) and  $M_{HighAff}$  with high affinity for R ( $K_{MR}^{-1} = 3\tilde{R}(0)^{-1}$ ) when their  $f_P$  is equal to 0.1 (solid line), 0.2 (dotted line) and 0.3 (dashed line) are plotted over one maturation cycle. (B)  $P(T)$  improves over increasing affinity  $K_{MR}^{-1}$  when  $f_P$  is 0.1 (solid line), 0.2 (dotted line) and 0.3 (dashed line). The dependence of  $P(T)$  on  $K_{MR}^{-1}$  is rather weak for low  $f_P$ . For example, when  $K_{MR}^{-1}$  increases from 1 to 3,  $P(T)$  increases by only 2% and 0.6% for  $f_P = 0.2$  and  $f_P = 0.1$ , respectively.

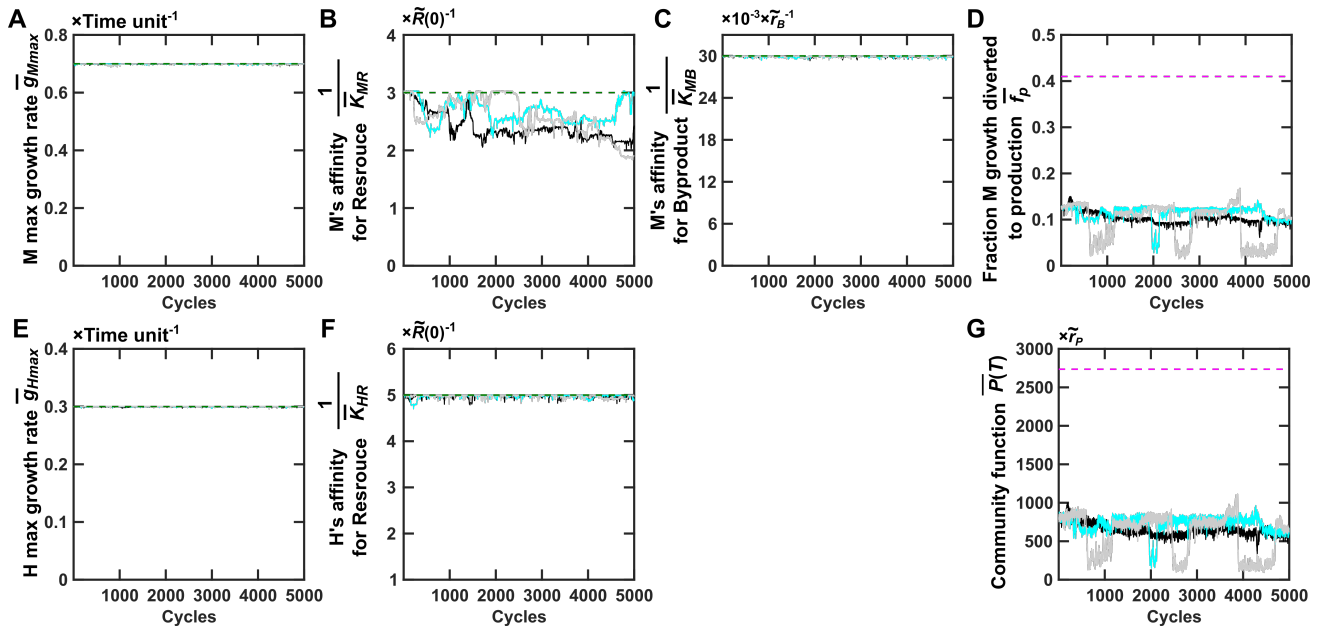

Figure S18: **Selection dynamics of communities of mono-adapted H and M when allowing all parameters to vary.** We start all growth parameters at their upper bounds and  $f_P = f_{P, Mono}^* = 0.13$  (Figure 5B), and perform community selection while allowing all growth parameters and  $f_P$  to vary. M's affinity for R  $1/\bar{K}_{MR}$  decreases slightly because at low  $f_P = 0.13$ , M with a lower affinity for R (lower  $1/\bar{K}_{MR}$ ) slightly improves individual fitness while slightly decreasing community function (Figure S17). Other growth parameters ( $\bar{g}_{Mmax}$ ,  $\bar{g}_{Hmax}$ ,  $1/\bar{K}_{MB}$  and  $1/\bar{K}_{HR}$ ) remain mostly constant during community selection because mutants with lower-than-maximal values are selected against by natural selection and by community selection (Figure S16). Other legend details can be found in Figure S10.

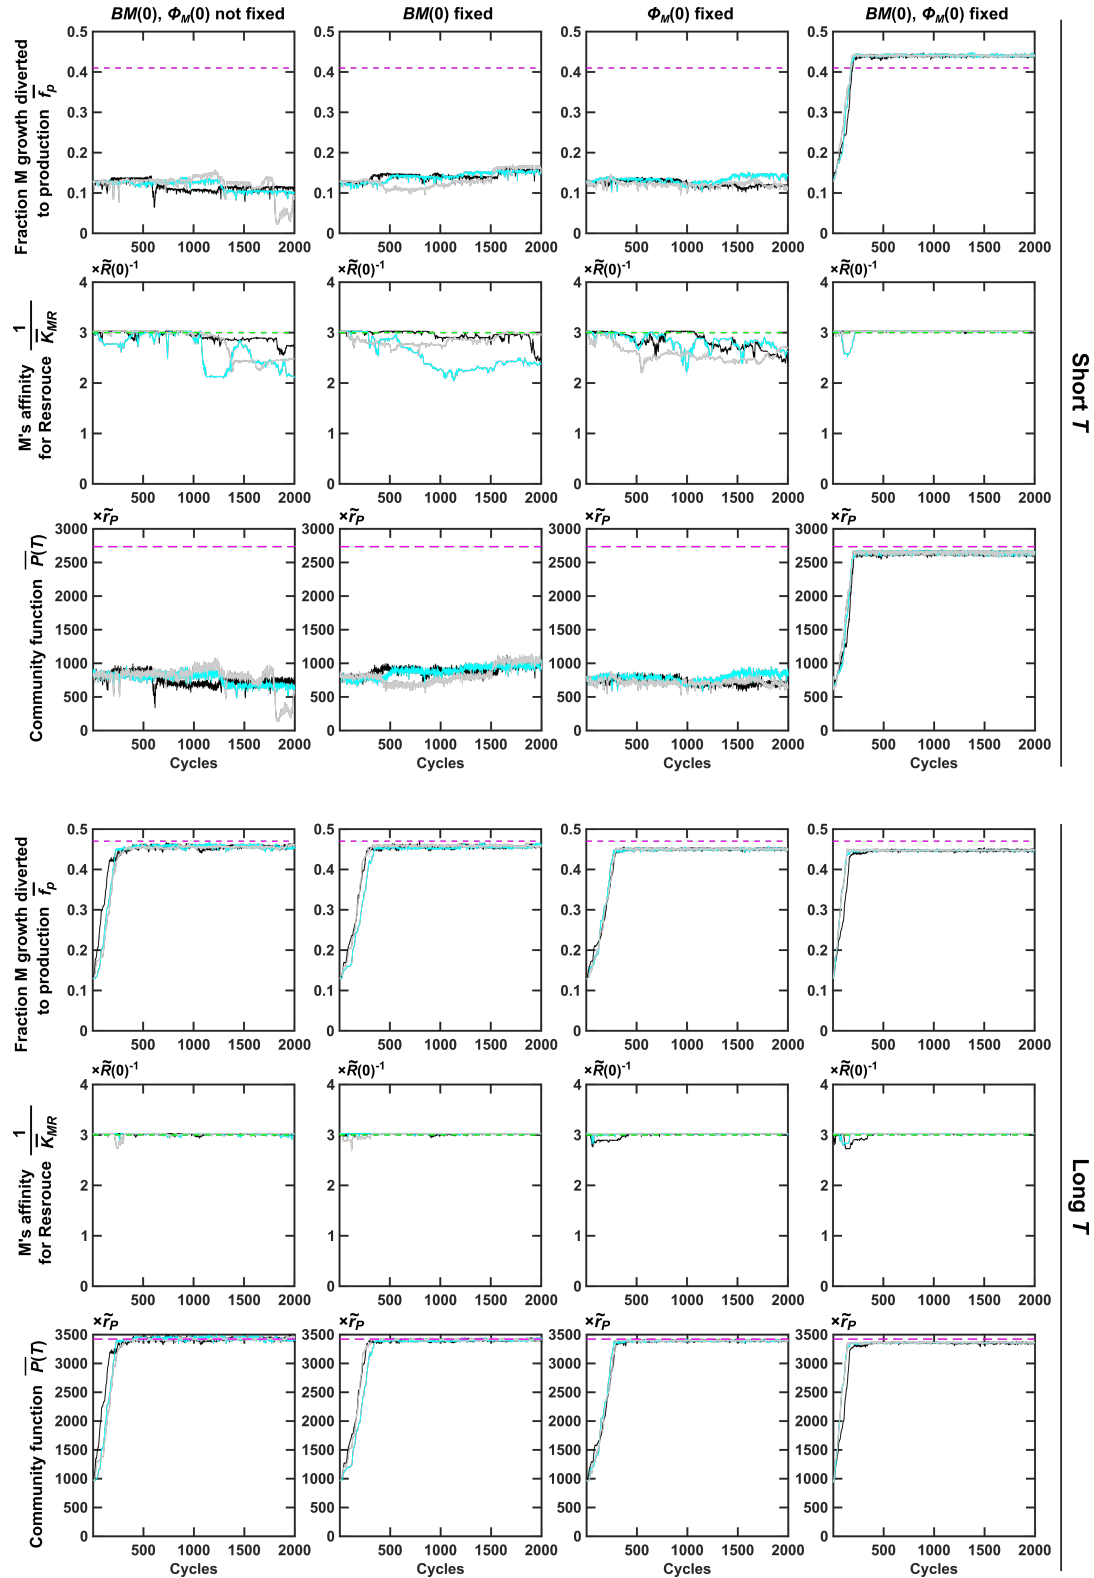

Figure S19: **Evolution dynamics of selected Adult communities when both  $f_P$  and  $K_{MR}$  are allowed to mutate.** The dynamics are similar to when only  $f_P$  is allowed to vary (Figure 6). Other legend details can be found in Figure S10.

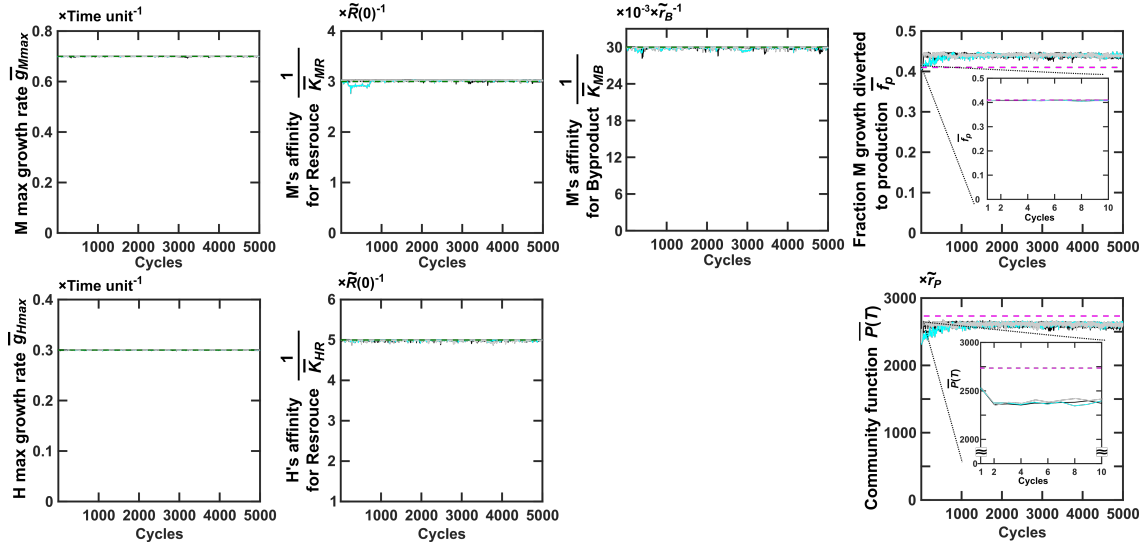

Figure S20: **Local optimality of community function  $P^*(T)$ .** We start each Newborn community with total biomass  $BM(0)=100$ , all five growth parameters at their upper bounds, and  $f_P^* = 0.41$  and  $\phi_M^*(0) = 0.54$  to achieve  $P^*(T)$ . We then allow all five growth parameters and  $f_P$  to mutate while applying community selection. To ensure effective community selection (Figure 6),  $BM(0)$  is fixed to 100, and  $\phi_M(0)$  is fixed to  $\phi_M(T)$  of the previous cycle during community reproduction. We find that all five growth parameters remain at their respective evolutionary upper bounds. At the end of the first cycle (Cycle = 1 in insets), even though  $\bar{f}_P$  has not changed,  $\bar{P}(T)$  has already declined from the original magenta dashed line. This is because species interactions have driven  $\phi_M(0)$  from the optimal  $\phi_M^*(0)$  ( $=0.54$ ) to near the steady state value ( $\phi_M=0.73$ , compare with  $\phi_{M,SS}$  represented by the green dashed line in Figure 1C bottom panel). Later, over hundreds of cycles,  $\bar{f}_P$  gradually increases, which increases  $\bar{P}(T)$ . However,  $\bar{P}(T)$  is still below maximal. This is because species composition gravitates toward steady state  $\phi_{M,SS}$  which deviates from the optimal  $\phi_M^*(0)$  ([60]). Other legend details can be found in Figure S10.

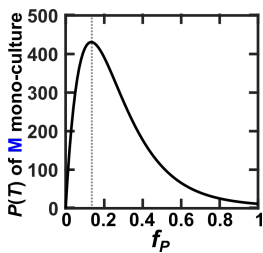

Figure S21: **Optimal  $f_P$  for accumulation of Product in an M monoculture is lower than that for an H-M community.** Suppose that a Newborn M group starts with a single Manufacturer (biomass 1) supplied with excess Byproduct and the same amount of Resource as in a Newborn H-M community. Then, maximal group function is achieved at a lower  $f_P = f_{P, Mono}^* = 0.13$  ("mono-adapted", dashed line). Here, the growth parameters of M and H are all fixed at their upper bounds and  $P(T)$  has the unit of  $\tilde{r}_P$ .

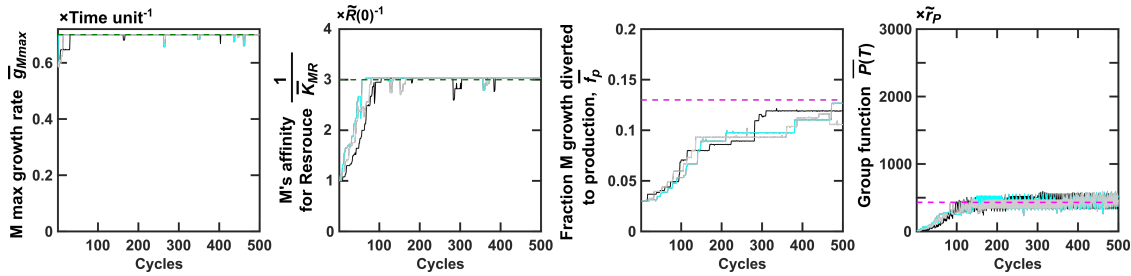

Figure S22: **Selection dynamics of M mono-species groups.** Phenotypes averaged over selected groups are plotted. Because Byproduct is in excess,  $K_{MB}$  terms are no longer relevant in equations (Figure S5,  $R_M \ll B_M$ ). Upper bounds of  $\bar{g}_{Mmax}$  and  $1/K_{MR}$  are marked with green dashed lines. Magenta lines mark maximal  $\bar{f}_P$  and  $P(T)$  when  $\bar{g}_{Mmax}$  and  $1/K_{MR}$  are fixed at their upper bounds and when Byproduct is in excess.

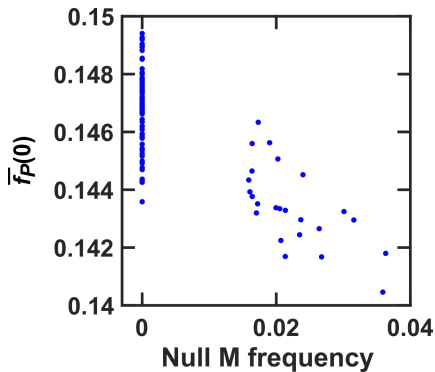

Figure S23: **The correlation between  $\bar{f}_P(0)$  and the frequency of null M in a Newborn community.** As Newborns randomly sample M cells from the parent Adult community, their average  $\bar{f}_P(0)$  partially correlates with the frequency of null M cells ( $f_P = 0$ ).

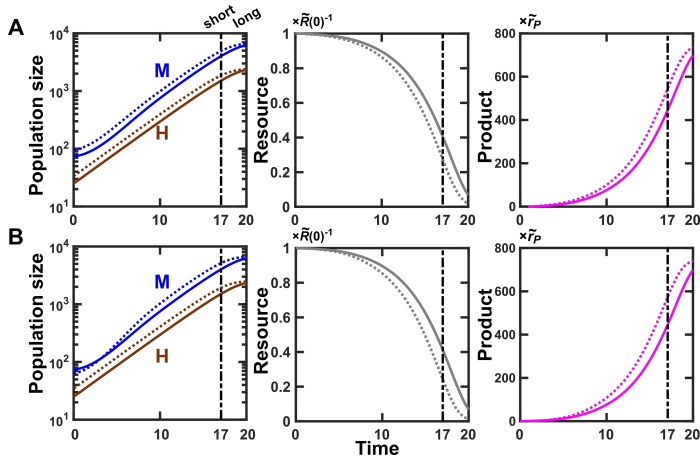

Figure S24: **Variations in community function can arise from non-heritable variations in Newborn compositions.** An average Newborn community (solid lines) has a total biomass of 100 with 75% M. (A) A “lucky” Newborn community (dotted lines), by stochastic fluctuations, has a total biomass of 130 with 75% M. Even though the two communities share identical  $f_P = 0.1$ , the Newborn with 130 total biomass has its M growing to a larger size (left), depleting more Resource (middle), and making more Product (right) by the end of short  $T (=17)$ . (B) A “lucky” Newborn community (dotted lines), by stochastic fluctuations, has 100 total biomass with 65% M. Even though the two communities share identical  $f_P = 0.1$ , the Newborn with lower  $\phi_M(0)$  (dotted) has its M enjoying a shorter growth lag and growing to a larger size (left), depleting more Resource (middle), and making more Product (right) by the end of short  $T (=17)$ . In both cases, the difference between lucky (dotted) and average (solid) communities is diminished at longer  $T$  ( $T = 20$ ) compared to shorter  $T$  ( $T = 17$ , dash dot line).



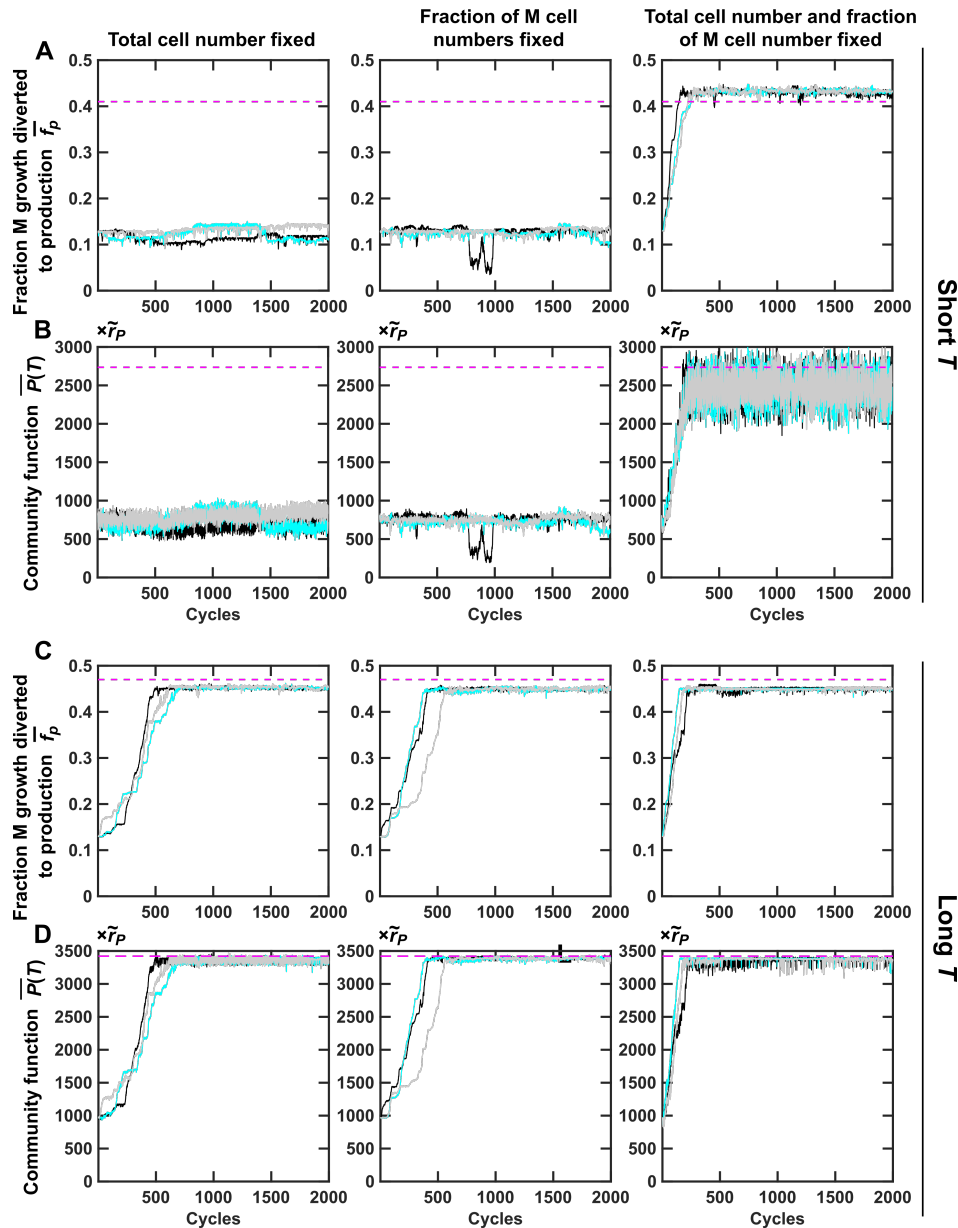

Figure S25: **Fixing H and M cell numbers (instead of biomass) during community reproduction allows short- $T$  selection regimen to improve community function.** For left panels, the total cell number is fixed to  $\lfloor N_0/1.5 \rfloor$  where  $\lfloor x \rfloor$  means the largest integer without exceeding  $x$ . For center panels, the ratio between M and H cell numbers are fixed to  $I_M(T)/I_H(T)$ , where  $I_M(T)$  and  $I_H(T)$  are the number of M and H cells in the selected Adult community, respectively. For right panels, the total cell numbers are fixed to  $\lfloor N_0/1.5 \rfloor$  and the ratio between M and H cell numbers are fixed to  $I_M(T)/I_H(T)$ . See Methods Section 6 for details of simulating community reproduction. Other legend details can be found in Figure 6.

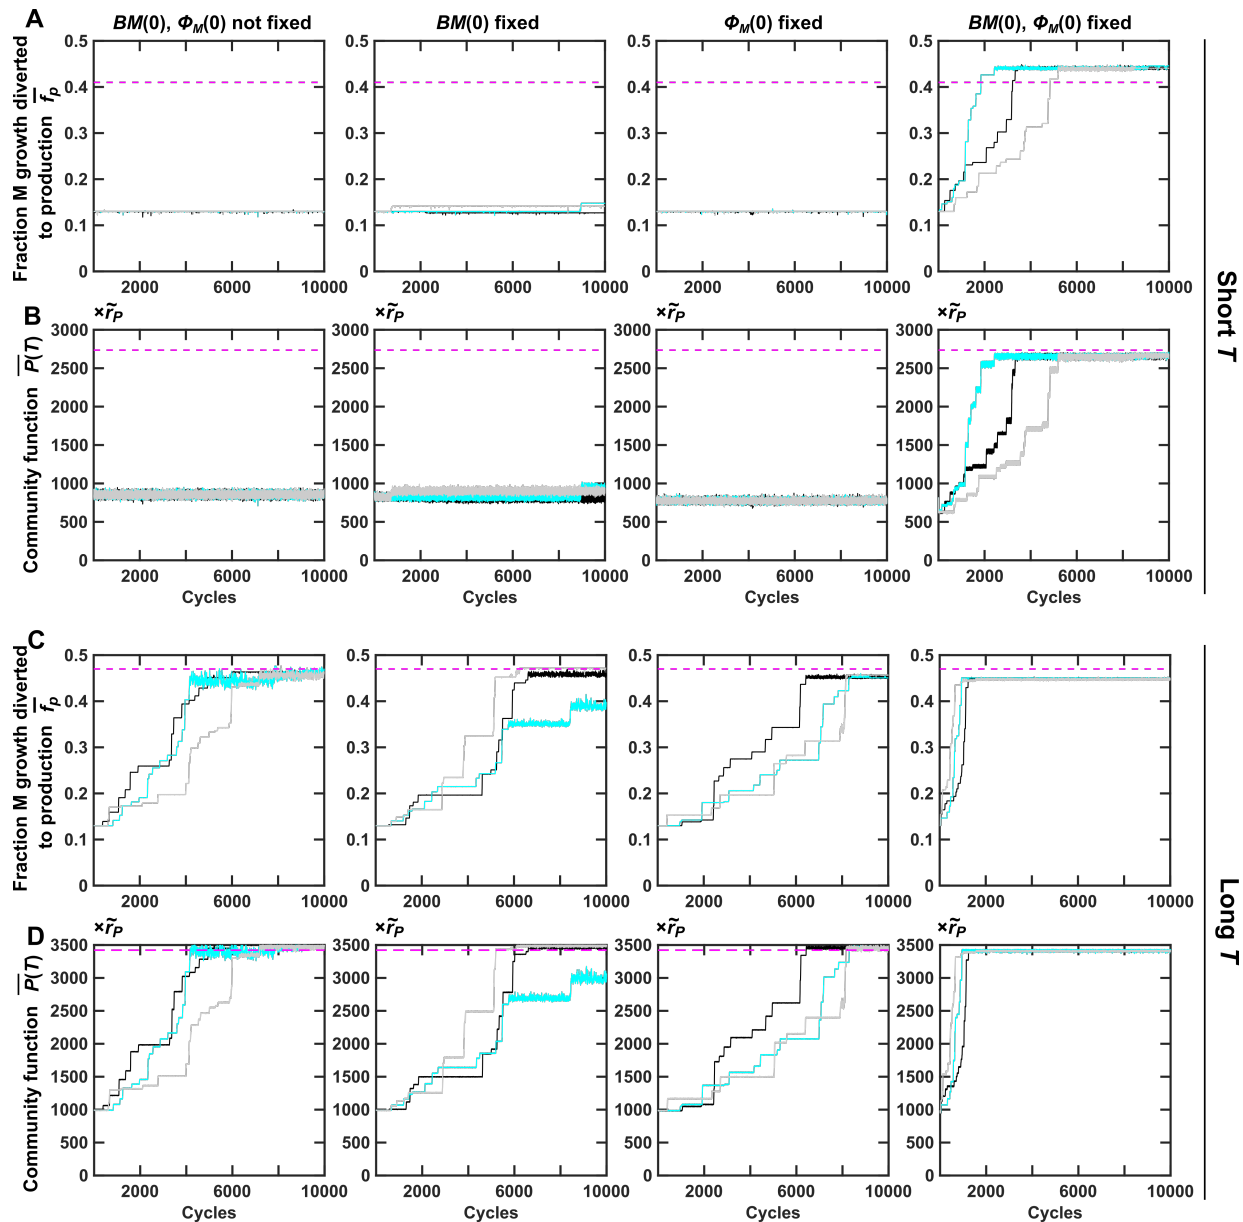

Figure S26: **Evolution dynamics of selected Adult communities at a mutation rate of  $2 \times 10^{-5}$  per cell per generation.** (A, B) At short maturation time ( $T = 17$ , Resource is not exhausted in an average community), fixing both  $BM(0)$  and  $\phi_M(0)$  is required for community function to improve. (C, D) At long maturation time ( $T = 20$ , Resource is nearly exhausted in an average community), community function improves without needing to fix  $BM(0)$  or  $\phi_M(0)$ . When both are fixed, community function improves even faster. At this mutation rate, because the population size of a community never exceeds  $10^4$ , a mutation occurs on average every 5 cycles, resulting in step-wise improvement in both  $\bar{f}_P(T)$  and  $\bar{P}(T)$ . Other legend details can be found in Figure 6.

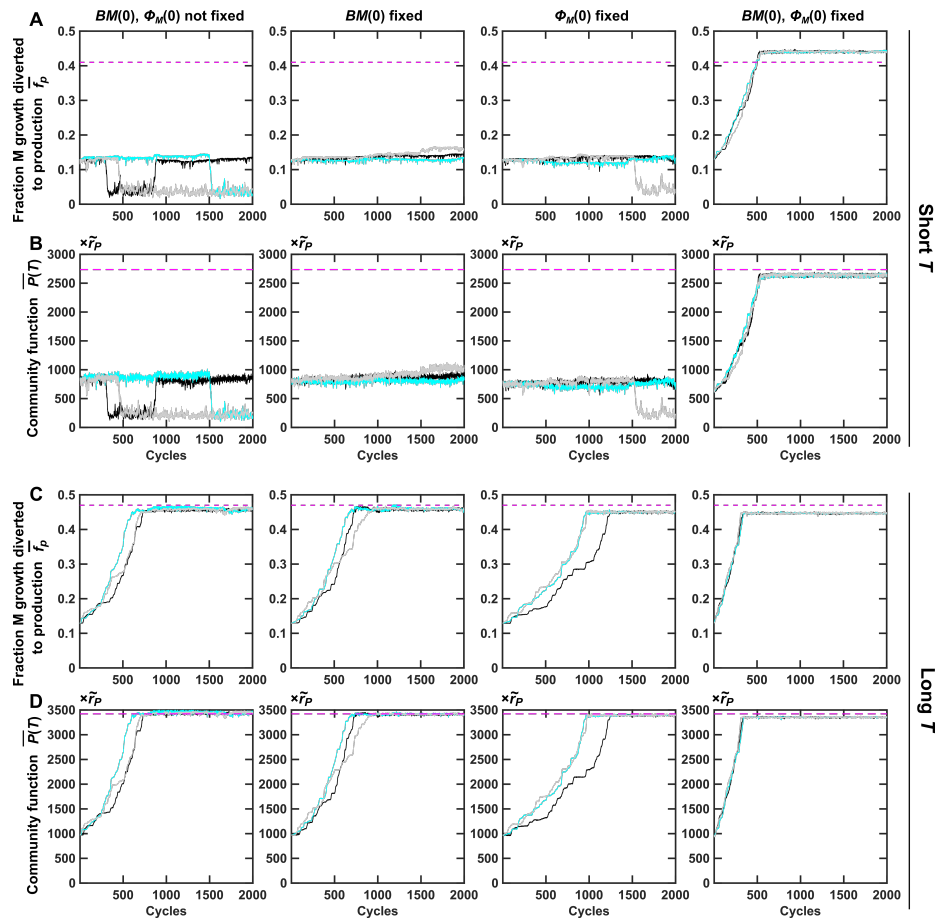

Figure S27: **Evolutionary dynamics of selected Adult communities under a different distribution of mutation effects.** Here, the distribution of mutation effects is specified by Eq. 19 where  $s_+ = s_- = 0.02$  are constants. Other legend details can be found in Figure 6.

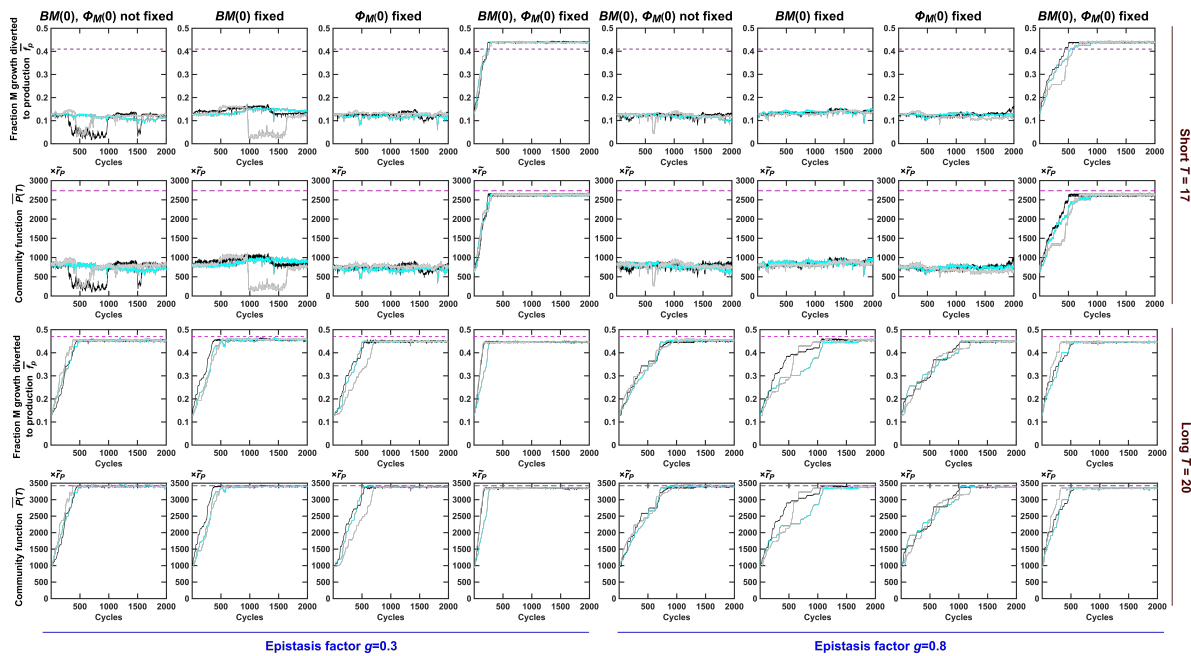

Figure S28: **Evolutionary dynamics of selected Adults when epistasis is considered.** When we incorporate different epistasis strengths (epistasis factor of 0.3 and 0.8), we obtain essentially the same conclusions as when epistasis is not considered (Figure 6). Other legend details can be found in Figure 6.

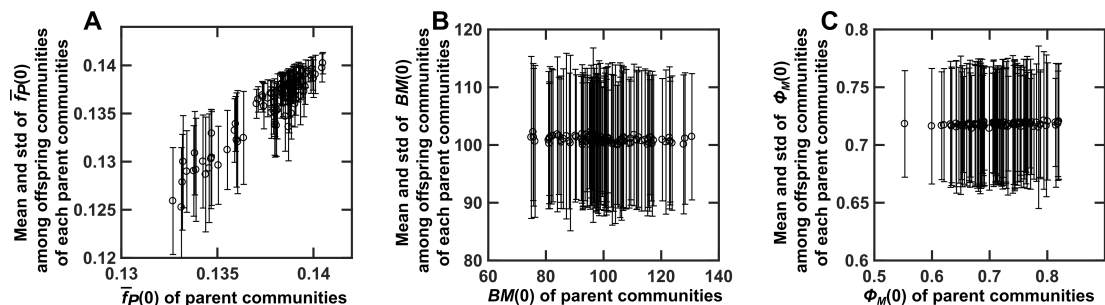

Figure S29: **Correlation of the three determinants of the community function between parent communities and offspring communities.** The scatter plots show the correlation between the offspring communities' determinants and their parent community's determinants. For example, the abscissa of each point in (A) indicates  $\bar{f}_P(0)$  of a parent community; the ordinate and error bar of each point in (A) indicate the mean and standard deviation of  $\bar{f}_P(0)$  among the offspring communities formed out of the parent community. 100 communities from the 100th cycle of one of the simulations shown in Figure 6A and B are analyzed to generate this plot.

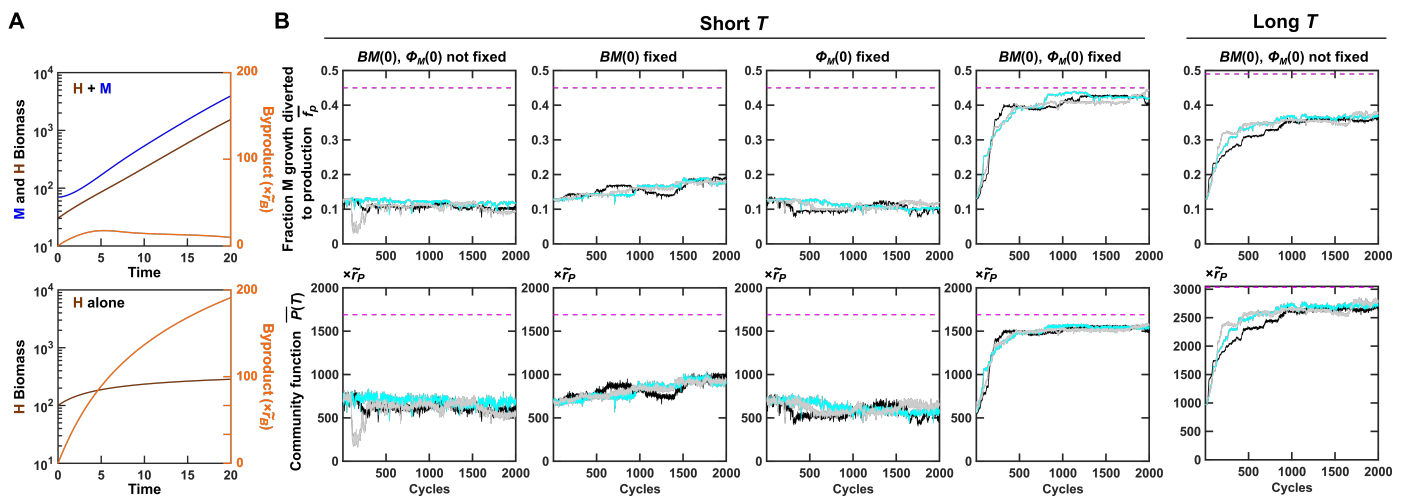

Figure S30: **Selection dynamics of mutualistic H-M communities.** In the mutualistic H-M community, H generates Byproduct which is essential for M but inhibitory to H. **(A)** H can grow to a high density in the presence of M (top) but not in the absence of M (bottom). **(B)** Similar to the commensal H-M community, selection works when non-heritable variations in  $P(T)$  are suppressed either via fixing both  $BM(0)$  and  $\phi_M(0)$  at short  $T$  ( $=17$ ) or via extending  $T$  ( $=20$ ). Other legend details can be found in Figure 6.

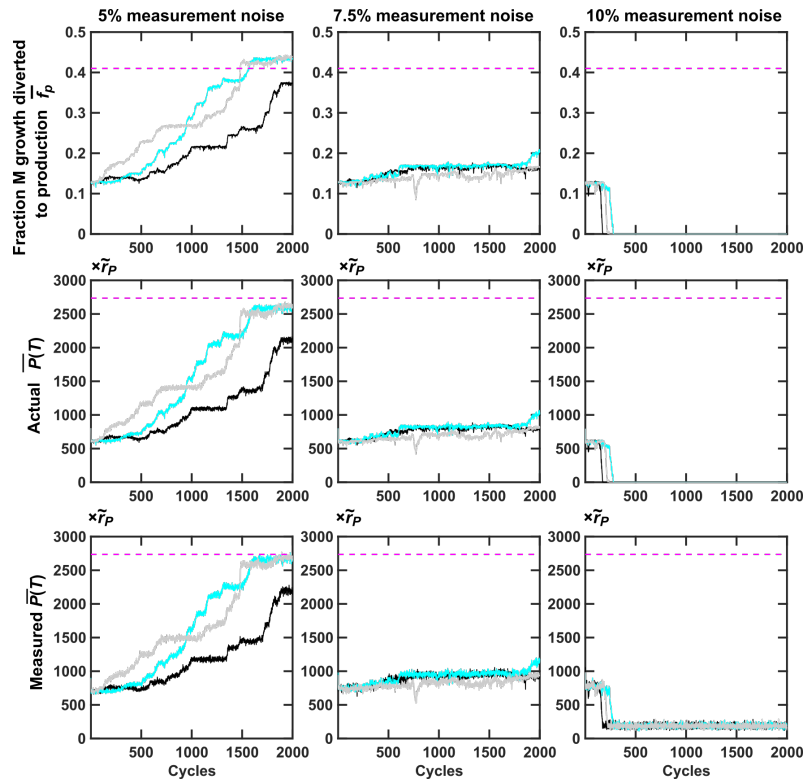

Figure S31: **Selection dynamics in the presence of measurement uncertainty in  $P(T)$ .** Evolution of  $\bar{f}_P(T)$  and  $\bar{P}(T)$  when Adult communities are chosen to reproduce based on “measured  $P(T)$ ” - the sum of actual  $P(T)$  and an “uncertainty term” randomly drawn from a normal distribution with zero mean. The amplitude of the noise is characterized by the standard deviation of the normal distribution. In the left, center, and right panels, the noise terms were drawn from normal distributions with standard deviations of 5%, 7.5%, and 10% of the ancestral  $P(T)$ , respectively. The middle and lower panels show the average actual  $P(T)$  and the average measured  $P(T)$ , respectively.

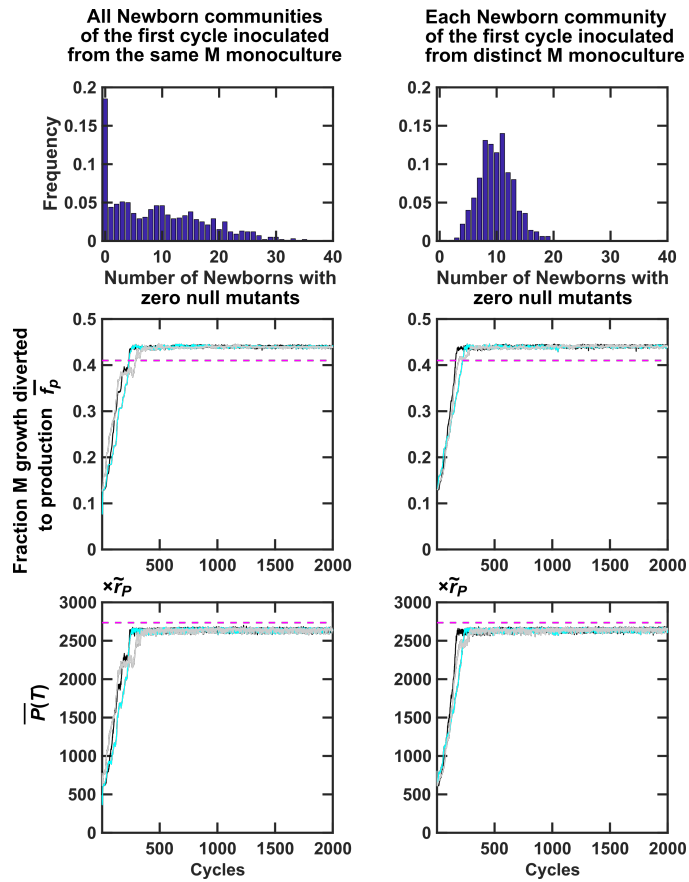

Figure S32: **Different ways of inoculating the Newborn communities of the first cycle had limited impact on selection dynamics.** (Top Panel) The number of communities initially free of non-producer M mutants depends on whether each Newborn community from the first cycle is inoculated from a distinct M monoculture. Each Newborn community for the first selection cycle was then inoculated with 60 M cells, either from the same M monoculture (**Left panel**), or from distinct M monocultures (**Right panel**). This pre-growth process is repeated 100 times, and the frequency of total numbers of Newborn communities out of 100 without non-producers is plotted. Selection dynamics are almost the same when the Newborn communities from the first cycle are inoculated by (**Left panel**) the same M monoculture or by (**Right panel**) distinct monocultures. Here we assumed that each monoculture grew from a single non-null M cell. This M cell went through  $\sim 23$  doublings and therefore multiplied into  $\sim 10^7$  cells. Every time a non-null M cell divides the mother and daughter cells can independently mutate and become a null M cell with  $f_P = 0$  at a fixed probability of  $10^{-3}$ . Assuming that all non-null M cells have identical  $f_P = 0.13$ , non-null M cells grow at a rate 87% of that of a null cell. As a result, after  $\sim 23$  doublings, the M monocultures have on average  $\sim 3\%$  null mutants.

## References

- 892
- 893 [1] Trevor D. Lawley, Simon Clare, Alan W. Walker, Mark D. Stares, Thomas R. Connor, Claire Raisen,  
894 David Goulding, Roland Rad, Fernanda Schreiber, Cordelia Brandt, Laura J. Deakin, Derek J.  
895 Pickard, Sylvia H. Duncan, Harry J. Flint, Taane G. Clark, Julian Parkhill, and Gordon Dougan.  
896 Targeted restoration of the intestinal microbiota with a simple, defined bacteriotherapy resolves  
897 relapsing *Clostridium difficile* disease in mice. *PLoS pathogens*, 8(10):e1002995, 2012.
- 898 [2] Stefanie Widder, Rosalind J. Allen, Thomas Pfeiffer, Thomas P. Curtis, Carsten Wiuf, William T.  
899 Sloan, Otto X. Cordero, Sam P. Brown, Babak Momeni, Wenying Shou, Helen Kettle, Harry J.  
900 Flint, Andreas F. Haas, Béatrice Laroche, Jan-Ulrich Kreft, Paul B. Rainey, Shiri Freilich, Stefan  
901 Schuster, Kim Milferstedt, Jan R. van der Meer, Tobias Großkopf, Jef Huisman, Andrew Free,  
902 Cristian Picioreanu, Christopher Quince, Isaac Klapper, Simon Labarthe, Barth F. Smets, Harris  
903 Wang, Isaac Newton Institute Fellows, and Orkun S. Soyer. Challenges in microbial ecology: building  
904 predictive understanding of community function and dynamics. *The ISME Journal*, March 2016.  
905 00001.
- 906 [3] Stephen R. Lindemann, Hans C. Bernstein, Hyun-Seob Song, Jim K. Fredrickson, Matthew W.  
907 Fields, Wenying Shou, David R. Johnson, and Alexander S. Beliaev. Engineering microbial consortia  
908 for controllable outputs. *The ISME Journal*, 10(9):2077–2084, September 2016.
- 909 [4] Jian Zhou, Qian Ma, Hong Yi, Lili Wang, Hao Song, and Ying-Jin Yuan. Metabolome profiling  
910 reveals metabolic cooperation between *Bacillus megaterium* and *Ketogulonicigenium vulgare* during  
911 induced swarm motility. *Applied and Environmental Microbiology*, 77(19):7023–7030, October 2011.  
912 00038.
- 913 [5] R. E. Wheatley. The consequences of volatile organic compound mediated bacterial and fungal  
914 interactions. *Antonie van Leeuwenhoek*, 81(1-4):357–364, December 2002. 00123.
- 915 [6] Kwang-sun Kim, Soohyun Lee, and Choong-Min Ryu. Interspecific bacterial sensing through air-  
916 borne signals modulates locomotion and drug resistance. *Nature Communications*, 4:1809, 2013.
- 917 [7] Matthew F Traxler, Jeramie D Watrous, Theodore Alexandrov, Pieter C Dorrestein, and Roberto  
918 Kolter. Interspecies interactions stimulate diversification of the *Streptomyces coelicolor* secreted  
919 metabolome. *mBio*, 4(4), 2013.
- 920 [8] William Swenson, David Sloan Wilson, and Roberta Elias. Artificial ecosystem selection. *Proceedings*  
921 *of the National Academy of Sciences*, 97:9110–9114, 2000.
- 922 [9] W. Swenson, J. Arendt, and D.S. Wilson. Artificial selection of microbial ecosystems for 3-  
923 chloroaniline biodegradation. *Environ Microbiol*, 2(5):564–71, October 2000.
- 924 [10] Hywel T. P. Williams and Timothy M. Lenton. Artificial selection of simulated microbial ecosystems.  
925 *Proceedings of the National Academy of Sciences*, 104(21):8918–8923, May 2007. 00036.
- 926 [11] Kevin Panke-Buisse, Angela C Poole, Julia K Goodrich, Ruth E Ley, and Jenny Kao-Kniffin. Selection  
927 on soil microbiomes reveals reproducible impacts on plant function. *The ISME journal*, 9(4):980,  
928 2015.
- 929 [12] Ulrich G Mueller, Thomas Juenger, Melissa Kardish, Alexis Carlson, Kathleen Burns, Chad Smith,  
930 and David De Marais. Artificial microbiome-selection to engineer microbiomes that confer salt-  
931 tolerance to plants. *bioRxiv*, page 081521, 2016.



- 932 [13] Charles J Goodnight. The influence of environmental variation on group and individual selection in  
933 a cress. *Evolution*, 39(3):545–558, 1985.
- 934 [14] Mitch D Day, Daniel Beck, and James A Foster. Microbial communities as experimental units.  
935 *Bioscience*, 61(5):398–406, 2011.
- 936 [15] U. G. Mueller and J. L. Sachs. Engineering Microbiomes to Improve Plant and Animal Health.  
937 *Trends in Microbiology*, 23(10):606–617, October 2015.
- 938 [16] Haoran Zhang, Brian Pereira, Zhengjun Li, and Gregory Stephanopoulos. Engineering escherichia  
939 coli coculture systems for the production of biochemical products. *Proceedings of the National  
940 Academy of Sciences*, page 201506781, 2015.
- 941 [17] Burton Simon, Jeffrey A Fletcher, and Michael Doebeli. Hamilton’s rule in multi-level selection  
942 models. *Journal of theoretical biology*, 299:55–63, 2012.
- 943 [18] James A Damore and Jeff Gore. Understanding microbial cooperation. *Journal of theoretical biology*,  
944 299:31–41, 2012.
- 945 [19] Babak Momeni, Li Xie, and Wenying Shou. Lotka-volterra pairwise modeling fails to capture diverse  
946 pairwise microbial interactions. *Elife*, 6, 2017.
- 947 [20] Jeremy J. Minty, Marc E. Singer, Scott A. Scholz, Chang-Hoon Bae, Jung-Ho Ahn, Clifton E.  
948 Foster, James C. Liao, and Xiaoxia Nina Lin. Design and characterization of synthetic fungal-  
949 bacterial consortia for direct production of isobutanol from cellulosic biomass. *Proceedings of the  
950 National Academy of Sciences*, 110(36):14592–14597, September 2013. 00024 PMID: 23959872.
- 951 [21] Kang Zhou, Kangjian Qiao, Steven Edgar, and Gregory Stephanopoulos. Distributing a metabolic  
952 pathway among a microbial consortium enhances production of natural products. *Nature biotech-  
953 nology*, 2015.
- 954 [22] Hyun-Dong Shin, Shara McClendon, Trinh Vo, and Rachel R. Chen. Escherichia coli Binary Culture  
955 Engineered for Direct Fermentation of Hemicellulose to a Biofuel. *Applied and Environmental  
956 Microbiology*, 76(24):8150–8159, December 2010. 00000.
- 957 [23] Wenying Shou, Sri Ram, and Jose M. G. Vilar. Synthetic cooperation in engineered yeast pop-  
958 ulations. *Proceedings of the National Academy of Sciences of the United States of America*,  
959 104(6):1877–1882, February 2007. 00137.
- 960 [24] Babak Momeni, Kristen A Brileya, Matthew W Fields, and Wenying Shou. Strong inter-population  
961 cooperation leads to partner intermixing in microbial communities. *eLife*, 2, January 2013.
- 962 [25] T Mankad and HR Bungay. Model for microbial growth with more than one limiting nutrient.  
963 *Journal of biotechnology*, 7(2):161–166, 1988.
- 964 [26] Sattar Taheri-Araghi, Serena Bradde, John T. Sauls, Norbert S. Hill, Petra Anne Levin, Johan  
965 Paulsson, Massimo Vergassola, and Suckjoon Jun. Cell-Size Control and Homeostasis in Bacteria.  
966 *Current Biology*, 25(3):385–391, February 2015.
- 967 [27] Richard E Lenski and Michael Travisano. Dynamics of adaptation and diversification: a 10,000-  
968 generation experiment with bacterial populations. *Proceedings of the National Academy of Sciences*,  
969 91(15):6808–6814, 1994.

- 970 [28] Adam James Waite and Wenying Shou. Adaptation to a new environment allows cooperators to  
971 purge cheaters stochastically. *Proceedings of the National Academy of Sciences*, 109(47):19079–  
972 19086, 2012.
- 973 [29] Paul B Rainey and Katrina Rainey. Evolution of cooperation and conflict in experimental bacterial  
974 populations. *Nature*, 425(6953):72, 2003.
- 975 [30] Rafael U Ibarra, Jeremy S Edwards, and Bernhard O Palsson. *Escherichia coli* k-12 undergoes  
976 adaptive evolution to achieve in silico predicted optimal growth. *Nature*, 420(6912):186, 2002.
- 977 [31] Rafael Sanjuán, Andrés Moya, and Santiago F Elena. The distribution of fitness effects caused by  
978 single-nucleotide substitutions in an rna virus. *Proceedings of the National Academy of Sciences of  
979 the United States of America*, 101(22):8396–8401, 2004.
- 980 [32] Karen S Sarkisyan, Dmitry A Bolotin, Margarita V Meer, Dinara R Usmanova, Alexander S Mishin,  
981 George V Sharonov, Dmitry N Ivankov, Nina G Bozhanova, Mikhail S Baranov, Onuralp Soylemez,  
982 et al. Local fitness landscape of the green fluorescent protein. *Nature*, 533(7603):397–401, 2016.
- 983 [33] Dominika M Wloch, Krzysztof Szafraniec, Rhona H Borts, and Ryszard Korona. Direct estimate  
984 of the mutation rate and the distribution of fitness effects in the yeast *saccharomyces cerevisiae*.  
985 *Genetics*, 159(2):441–452, 2001.
- 986 [34] Celia Payen, Anna B Sunshine, Giang T Ong, Jamie L Pogachar, Wei Zhao, and Maitreya J Dunham.  
987 High-throughput identification of adaptive mutations in experimentally evolved yeast populations.  
988 *PLoS genetics*, 12(10):e1006339, 2016.
- 989 [35] Samuel Frederick Mock Hart, David Skelding, Adam J Waite, Justin Burton, Li Xie, and Wenying  
990 Shou. Microscopy quantification of microbial birth and death dynamics. *bioRxiv*, page 324269,  
991 2018.
- 992 [36] Kristina L Hillesland and David A Stahl. Rapid evolution of stability and productivity at the origin  
993 of a microbial mutualism. *Proceedings of the National Academy of Sciences*, 107(5):2124–2129,  
994 2010.
- 995 [37] Herwig Bachmann, Martin Fischlechner, Iraes Rabbers, Nakul Barfa, Filipe Branco dos Santos,  
996 Douwe Molenaar, and Bas Teusink. Availability of public goods shapes the evolution of competing  
997 metabolic strategies. *Proceedings of the National Academy of Sciences of the United States of  
998 America*, 110(35):14302–14307, August 2013.
- 999 [38] W. D. Hamilton. The genetical evolution of social behaviour I and II. *Journal of Theoretical Biology*,  
1000 7(1):1–52, July 1964.
- 1001 [39] John Maynard Smith. Group Selection and Kin Selection. *Nature*, 201(4924):1145–1147, March  
1002 1964.
- 1003 [40] Sewall Wright. Tempo and Mode in Evolution: A Critical Review. *Ecology*, 26(4):415–419, 1945.
- 1004 [41] George R. Price. Selection and Covariance. *Nature*, 227(5257):520–521, August 1970. 01240.
- 1005 [42] Michael J. Wade. A Critical Review of the Models of Group Selection. *The Quarterly Review of  
1006 Biology*, 53(2):101–114, June 1978. ArticleType: research-article / Full publication date: Jun.,  
1007 1978 / Copyright © 1978 The University of Chicago Press.

- 1008 [43] William M Muir. Group selection for adaptation to multiple-hen cages: selection program and direct  
1009 responses. *Poultry Science*, 75(4):447–458, 1996.
- 1010 [44] David C. Queller and Joan E. Strassmann. Kin Selection and Social Insects. *BioScience*, 48(3):165–  
1011 175, March 1998.
- 1012 [45] Michael J Wade. An experimental study of kin selection. *Evolution*, pages 844–855, 1980.
- 1013 [46] Arne Traulsen and Martin A. Nowak. Evolution of cooperation by multilevel selection. *Proceedings  
1014 of the National Academy of Sciences*, 103(29):10952–10955, July 2006.
- 1015 [47] L. Lehmann, L. Keller, S. West, and D. Roze. Group selection and kin selection: Two concepts but  
1016 one process. *Proc Natl Acad Sci USA*, 104(16):6736–6739, April 2007.
- 1017 [48] Benjamin Kerr. Theoretical and experimental approaches to the evolution of altruism and the  
1018 levels of selection. *Experimental Evolution: Concepts, Methods, and Applications of Selection  
1019 Experiments*, pages 585–630, 2009. 00006.
- 1020 [49] Herwig Bachmann, Frank J Bruggeman, Douwe Molenaar, Filipe Branco dos Santos, and Bas  
1021 Teusink. Public goods and metabolic strategies. *Current Opinion in Microbiology*, 31:109–115,  
1022 June 2016. 00000.
- 1023 [50] Katrin Hammerschmidt, Caroline J. Rose, Benjamin Kerr, and Paul B. Rainey. Life cycles, fitness  
1024 decoupling and the evolution of multicellularity. *Nature*, 515(7525):75–79, November 2014.
- 1025 [51] Martin A. Nowak. Five Rules for the Evolution of Cooperation. *Science*, 314(5805):1560–1563,  
1026 December 2006.
- 1027 [52] C. J. Goodnight and L. Stevens. Experimental studies of group selection: what do they tell us  
1028 about group selection in nature? *The American Naturalist*, 150 Suppl 1:S59–79, July 1997.
- 1029 [53] D. S. Wilson. A theory of group selection. *Proceedings of the National Academy of Sciences*,  
1030 72(1):143–146, January 1975.
- 1031 [54] Michael E Gilpin. *Group selection in predator-prey communities*, volume 9. Princeton University  
1032 Press, 1975.
- 1033 [55] J. Maynard Smith. Group Selection. *The Quarterly Review of Biology*, 51(2):277–283, June 1976.
- 1034 [56] Michael Doebeli, Yaroslav Ispolatov, and Burt Simon. Towards a mechanistic foundation of evolu-  
1035 tionary theory. *eLife*, 6:e23804, February 2017.
- 1036 [57] L. Chao and B.R. Levin. Structured habitats and the evolution of anticompetitor toxins in bacteria.  
1037 *Proc Natl Acad Sci U S A*, 78(10):6324–8, October 1981.
- 1038 [58] John S Chuang, Olivier Rivoire, and Stanislas Leibler. Simpson’s paradox in a synthetic microbial  
1039 system. *Science (New York, N.Y.)*, 323(5911):272–275, January 2009.
- 1040 [59] George R Price. Extension of covariance selection mathematics. *Annals of human genetics*,  
1041 35(4):485–490, 1972.
- 1042 [60] Li Xie and Wenying Shou. Community function landscape and steady state species composition  
1043 shape the eco-evolutionary dynamics of artificial community selection. *bioRxiv*, page 264697, 2018.

- 1044 [61] John L Spudich and Daniel E Koshland Jr. Non-genetic individuality: chance in the single cell.  
1045 *Nature*, 262(5568):467, 1976.
- 1046 [62] Stephen T Chisholm, Gitta Coaker, Brad Day, and Brian J Staskawicz. Host-microbe interactions:  
1047 shaping the evolution of the plant immune response. *Cell*, 124(4):803–814, 2006.
- 1048 [63] Ruth E Ley, Micah Hamady, Catherine Lozupone, Peter J Turnbaugh, Rob Roy Ramey, J Stephen  
1049 Bircher, Michael L Schlegel, Tammy A Tucker, Mark D Schrenzel, Rob Knight, et al. Evolution of  
1050 mammals and their gut microbes. *Science*, 320(5883):1647–1651, 2008.
- 1051 [64] Kevin R Foster, Jonas Schluter, Katharine Z Coyte, and Seth Rakoff-Nahoum. The evolution of the  
1052 host microbiome as an ecosystem on a leash. *Nature*, 548(7665):43, 2017.
- 1053 [65] Luc De Vuyst, Raf Callewaert, and Kurt Crabbé. Primary metabolite kinetics of bacteriocin biosyn-  
1054 thesis by *Lactobacillus amylovorus* and evidence for stimulation of bacteriocin production under  
1055 unfavourable growth conditions. *Microbiology*, 142(4):817–827, 1996.
- 1056 [66] Melanie JI Müller, Beverly I Neugeboren, David R Nelson, and Andrew W Murray. Genetic drift  
1057 opposes mutualism during spatial population expansion. *Proceedings of the National Academy of  
1058 Sciences*, 111(3):1037–1042, 2014.
- 1059 [67] Thomas Egli. *Nutrition, microbial*. Oxford: Elsevier Academic Press, 2009.
- 1060 [68] Kai Zhuang, Goutham N Vemuri, and Radhakrishnan Mahadevan. Economics of membrane occu-  
1061 pancy and respiro-fermentation. *Molecular systems biology*, 7(1):500, 2011.
- 1062 [69] Joan B Peris, Paulina Davis, José M Cuevas, Miguel R Nebot, and Rafael Sanjuán. Distribution of  
1063 fitness effects caused by single-nucleotide substitutions in bacteriophage f1. *Genetics*, 185(2):603–  
1064 609, 2010.
- 1065 [70] Adrian WR Serohijos and Eugene I Shakhnovich. Merging molecular mechanism and evolution:  
1066 theory and computation at the interface of biophysics and evolutionary population genetics. *Current  
1067 opinion in structural biology*, 26:84–91, 2014.
- 1068 [71] Adam Eyre-Walker and Peter D Keightley. The distribution of fitness effects of new mutations.  
1069 *Nature reviews. Genetics*, 8(8):610, 2007.
- 1070 [72] Michael A Stiffler, Doeke R Hekstra, and Rama Ranganathan. Evolvability as a function of purifying  
1071 selection in *tem-1*  $\beta$ -lactamase. *Cell*, 160(5):882–892, 2015.
- 1072 [73] John W Drake. A constant rate of spontaneous mutation in dna-based microbes. *Proceedings of  
1073 the National Academy of Sciences*, 88(16):7160–7164, 1991.
- 1074 [74] Gregory I. Lang and Andrew W. Murray. Estimating the Per-Base-Pair Mutation Rate in the Yeast  
1075 *Saccharomyces cerevisiae*. *Genetics*, 178(1):67–82, January 2008.
- 1076 [75] Sasha F Levy, Jamie R Blundell, Sandeep Venkataram, Dmitri A Petrov, Daniel S Fisher, and  
1077 Gavin Sherlock. Quantitative evolutionary dynamics using high-resolution lineage tracking. *Nature*,  
1078 519(7542):181, 2015.
- 1079 [76] Clifford Zeyl and J Arjan GM DeVisser. Estimates of the rate and distribution of fitness effects of  
1080 spontaneous mutation in *saccharomyces cerevisiae*. *Genetics*, 157(1):53–61, 2001.

- 1081 [77] Jeffrey E Barrick, Dong Su Yu, Sung Ho Yoon, Haeyoung Jeong, Tae Kwang Oh, Dominique  
1082 Schneider, Richard E Lenski, and Jihyun F Kim. Genome evolution and adaptation in a long-term  
1083 experiment with *escherichia coli*. *Nature*, 461(7268):1243, 2009.
- 1084 [78] Toon Swings, Bram Van den Bergh, Sander Wuyts, Eline Oeyen, Karin Voordeckers, Kevin J  
1085 Verstrepen, Maarten Fauvart, Natalie Verstraeten, and Jan Michiels. Adaptive tuning of mutation  
1086 rates allows fast response to lethal stress in *escherichia coli*. *eLife*, 6(22939), 2017.
- 1087 [79] Lília Perfeito, Lisete Fernandes, Catarina Mota, and Isabel Gordo. Adaptive mutations in bacteria:  
1088 high rate and small effects. *Science*, 317(5839):813–815, 2007.
- 1089 [80] John H Gillespie. Molecular evolution over the mutational landscape. *Evolution*, 38(5):1116–1129,  
1090 1984.
- 1091 [81] H Allen Orr. The distribution of fitness effects among beneficial mutations. *Genetics*, 163(4):1519–  
1092 1526, 2003.
- 1093 [82] Marianne Imhof and Christian Schlötterer. Fitness effects of advantageous mutations in evolving  
1094 *escherichia coli* populations. *Proceedings of the National Academy of Sciences*, 98(3):1113–1117,  
1095 2001.
- 1096 [83] Rees Kassen and Thomas Bataillon. Distribution of fitness effects among beneficial mutations before  
1097 selection in experimental populations of bacteria. *Nature genetics*, 38(4):484, 2006.
- 1098 [84] Darin R Rokyta, Paul Joyce, S Brian Caudle, and Holly A Wichman. An empirical test of the  
1099 mutational landscape model of adaptation using a single-stranded dna virus. *Nature genetics*,  
1100 37(4):441, 2005.
- 1101 [85] Darin R Rokyta, Craig J Beisel, Paul Joyce, Martin T Ferris, Christina L Burch, and Holly A  
1102 Wichman. Beneficial fitness effects are not exponential for two viruses. *Journal of molecular  
1103 evolution*, 67(4):368, 2008.
- 1104 [86] Michael J Wisser, Noah Ribeck, and Richard E Lenski. Long-term dynamics of adaptation in asexual  
1105 populations. *Science*, 342(6164):1364–1367, 2013.
- 1106 [87] Lukasz Jasnos and Ryszard Korona. Epistatic buffering of fitness loss in yeast double deletion strains.  
1107 *Nature genetics*, 39(4):550, 2007.
- 1108 [88] Rafael Sanjuán, Andrés Moya, and Santiago F Elena. The contribution of epistasis to the architecture  
1109 of fitness in an rna virus. *Proceedings of the National Academy of Sciences of the United States of  
1110 America*, 101(43):15376–15379, 2004.
- 1111 [89] Aisha I Khan, Duy M Dinh, Dominique Schneider, Richard E Lenski, and Tim F Cooper. Negative  
1112 epistasis between beneficial mutations in an evolving bacterial population. *Science*, 332(6034):1193–  
1113 1196, 2011.
- 1114 [90] Santiago F Elena and Richard E Lenski. Test of synergistic interactions among deleterious mutations  
1115 in bacteria. *Nature*, 390(6658):395, 1997.
- 1116 [91] Carlos L Araya, Douglas M Fowler, Wentao Chen, Ike Muniez, Jeffery W Kelly, and Stanley Fields.  
1117 A fundamental protein property, thermodynamic stability, revealed solely from large-scale measure-  
1118 ments of protein function. *Proceedings of the National Academy of Sciences*, 109(42):16858–16863,  
1119 2012.

- 1120 [92] Hsin-Hung Chou, Hsuan-Chao Chiu, Nigel F Delaney, Daniel Segrè, and Christopher J Marx.  
1121 Diminishing returns epistasis among beneficial mutations decelerates adaptation. *Science*,  
1122 332(6034):1190–1192, 2011.
- 1123 [93] Sergey Kryazhimskiy, Daniel P Rice, Elizabeth R Jerison, and Michael M Desai. Global epistasis  
1124 makes adaptation predictable despite sequence-level stochasticity. *Science*, 344(6191):1519–1522,  
1125 2014.
- 1126 [94] G. W. Luli and W. R. Strohl. Comparison of growth, acetate production, and acetate inhibition of  
1127 *Escherichia coli* strains in batch and fed-batch fermentations. *Applied and Environmental Microbi-*  
1128 *ology*, 56(4):1004–1011, April 1990.
- 1129 [95] Wenying Shou. Acknowledging selection at sub-organismal levels resolves controversy on pro-  
1130 cooperation mechanisms. *eLife*, page e10106, December 2015.
- 1131 [96] R C Lewontin. The Units of Selection. *Annual Review of Ecology and Systematics*, 1(1):1–18,  
1132 1970.
- 1133 [97] A. Cramer, E. A. Whitehorn, E. Tate, and W. P. Stemmer. Improved green fluorescent protein by  
1134 molecular evolution using DNA shuffling. *Nature Biotechnology*, 14(3):315–319, March 1996.
- 1135 [98] Manfred T. Reetz and José Daniel Carballeira. Iterative saturation mutagenesis (ISM) for rapid  
1136 directed evolution of functional enzymes. *Nature Protocols*, 2(4):891–903, April 2007.
- 1137 [99] Eric T. Boder, Katarina S. Midelfort, and K. Dane Wittrup. Directed evolution of antibody fragments  
1138 with monovalent femtomolar antigen-binding affinity. *Proceedings of the National Academy of*  
1139 *Sciences*, 97(20):10701–10705, September 2000.
